# Supplementary material for: Regio- and chemoselective Csp3–H arylation of benzylamines by single electron transfer/hydrogen atom transfer synergistic catalysis
Source: PubMed Central journal article supplement (PMC6244453; doi:10.1039/c8sc02965b), 2018-09-12

## Electronic Supplementary Information

### **Regio- and chemoselective Csp<sup>3</sup>-H arylation of benzylamines by single electron transfer/hydrogen atom transfer synergistic catalysis**

Takafumi Ide, Joshua P. Barham, Masashi Fujita, Yuji Kawato, Hiromichi Egami, and

Yoshitaka Hamashima\*

*School of Pharmaceutical Sciences, University of Shizuoka, 52-1 Yada, Suruga-ku, Shizuoka  
422-8526, Japan*

hamashima@u-shizuoka-ken.ac.jp

#### **Table of Contents**

1. General information
2. Preparation of amine substrates
3. C-H arylation with Ir complex under photo-irradiation
4. Cyclic voltammetry
5. Screening of the reaction conditions for benzylic C-H arylation
6. Benzylic C-H arylation under SET-HAT synergistic catalysis
7. Limitation regarding electron-deficient aromatic compounds
8. References
9. NMR spectra

## 1. General information

<sup>1</sup>H NMR spectra were measured on a JEOL JNM-ECA-500 spectrometer at 500 MHz. <sup>13</sup>C NMR spectra were recorded on a JEOL JNM-ECA-500 spectrometer at 125 MHz. Chemical shifts were reported in parts per million (ppm) downfield from TMS (= 0) or CDCl<sub>3</sub> for <sup>1</sup>H NMR. For <sup>13</sup>C NMR, chemical shifts were reported in the scale relative to CDCl<sub>3</sub>. Infrared spectra were measured on a SHIMADZU IRPrestige-21 and only diagnostic absorptions are listed below. ESI-MS data were taken on a Thermo SCIENTIFIC ACCELA Exactive liquid chromatography–mass spectrometer (LC–MS). Column chromatography was performed with silica gel N-60 (40-100 μm) purchased from Kanto Chemical Co., Inc. TLC analysis was performed on Silica gel 60 F254-coated glass plates (Merck). Visualization was accomplished by means of ultraviolet (UV) irradiation at 254 nm or by spraying 12-molybdo(VI)phosphoric acid ethanol solution as a developing agent. GPC purification was conducted on a Shimadzu recycling preparative HPLC system [LC-20AR; column, YMC-GPC T-2000; chloroform]. Blue light irradiation was performed with a RelyOn LED lamp (3 W, λ = 425 nm).

Dehydrated *N,N*-dimethylacetamide (DMA), *N,N*-dimethylformamide (DMF), acetonitrile (CH<sub>3</sub>CN), acetone and tetrahydrofuran (THF) were purchased from Kanto Chemical Co. Dehydrated dichloromethane (CH<sub>2</sub>Cl<sub>2</sub>) and diethyl ether (Et<sub>2</sub>O) were purchased from Wako Pure Chemical Industries, Ltd. Photoredox catalysts were purchased from Sigma-Aldrich. Benzylamine substrates were prepared according to the literatures.<sup>1-3</sup> Thiobenzoic acid was purchased from Tokyo Chemical Industry Co., Ltd. (TCI). Other reagents were purified by usual methods.

## 2. Preparation of amine substrates

### 2.1. Synthesis of (4-((dimethylamino)methyl)phenyl)methanol (**1ad**)

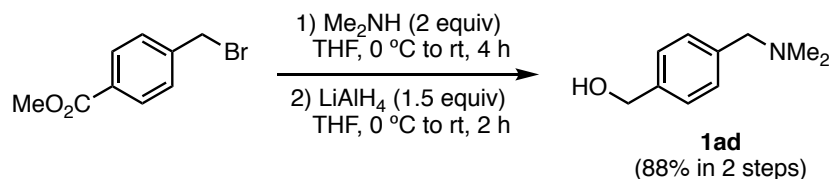

To a solution of methyl 4-(bromomethyl)benzoate (2.0 g, 8.7 mmol) in THF (50 mL) was added  $\text{Me}_2\text{NH}$  (2 M in THF, 8.7 mL, 17.4 mmol) at 0 °C. The reaction mixture was stirred for 4 h at ambient temperature, and then  $\text{H}_2\text{O}$  was added to the mixture. The organic material was extracted with EtOAc (15 mL  $\times$  2). The combined organic layers were washed with brine and dried over  $\text{MgSO}_4$ . After filtration, the filtrate was concentrated *in vacuo* and the crude mixture was used without further purification in the next step.

To a solution of  $\text{LiAlH}_4$  (495 mg, 13.1 mmol) in THF (30 mL) was added a solution of the crude mixture in THF (10 mL) at 0 °C. The resultant mixture was stirred for 2 h. The reaction was quenched with  $\text{H}_2\text{O}$  (0.5 mL), and 1 N NaOH aq. (0.5 mL) and  $\text{H}_2\text{O}$  (1.5 mL) were carefully added to the mixture. After filtration, the filtrate was concentrated *in vacuo* and the residue was purified by column chromatography on silica gel (*n*-hexane/EtOAc = 5/1) to provide **1ad** (1.27 g, 88% yield in 2 steps) as a colorless oil.

**1ad**:  $^1\text{H}$  NMR (500 MHz,  $\text{CDCl}_3$ ):  $\delta$  = 7.33 (d,  $J$  = 8.0 Hz, 2H), 7.30 (d,  $J$  = 8.0 Hz, 2H), 4.69 (s, 2H), 3.42 (s, 2H), 2.23 (s, 6H);  $^{13}\text{C}$  NMR (125 MHz,  $\text{CDCl}_3$ ):  $\delta$  = 140.3, 137.1, 129.3, 126.8, 64.5, 63.8, 45.0; HRMS (ESI $^+$ ): Calcd. for  $[\text{C}_{10}\text{H}_{15}\text{NO}+\text{H}]^+$ :  $m/z$  = 166.1226, Found: 166.1225.

### 2.2. Synthesis of *N*-benzyl-4-((dimethylamino)methyl)aniline (**1ae**)

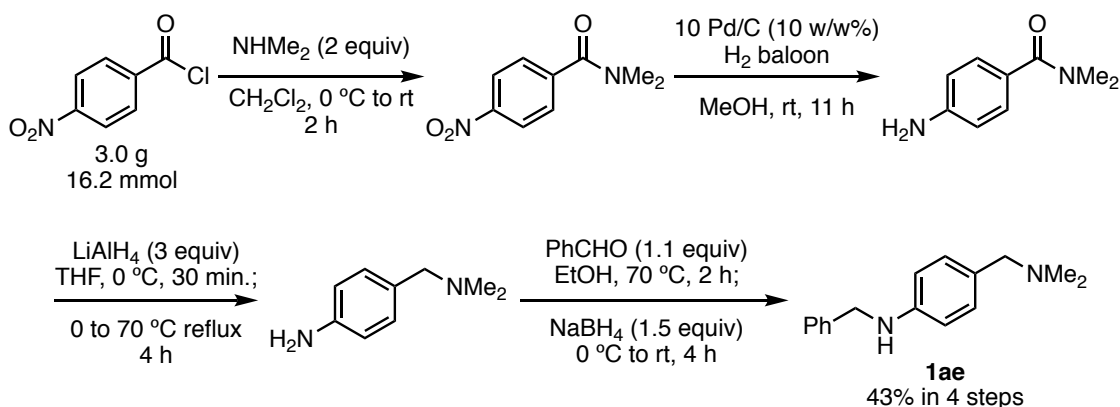

To a solution of 4-nitrobenzoyl chloride (3.0 g, 16.2 mmol) in  $\text{CH}_2\text{Cl}_2$  (50 mL) was added  $\text{Me}_2\text{NH}$  (2 M in THF, 16.2 mL, 32.4 mmol) at 0 °C. The reaction mixture was stirred for 2 h at ambient temperature and concentrated *in vacuo*. The residue was diluted with EtOAc (30 mL) and was washed with  $\text{H}_2\text{O}$  and brine. The combined organic layers were dried over  $\text{MgSO}_4$ . After filtration, the filtrate was concentrated *in vacuo* and the crude mixture (2.81 g) was used without further purification in the next step.

A round-bottom flask (100 mL) equipped with a Teflon septum and a magnetic stir bar was charged with the above crude mixture (2.81 g) and 10% Pd/C (281 mg, 10 w/w%). The flask was purged with a stream of argon and MeOH (30 mL) was added to the flask via a syringe. The reaction mixture was degassed and the flask was backfilled with hydrogen. After being stirred for 18 h, the mixture was filtered through a pad of Celite. The filtrate was concentrated *in vacuo* and the crude mixture (2.37 g) was used without further purification in the next step.

To a solution of LiAlH<sub>4</sub> (1.64 g, 43.3 mmol) in THF (60 mL) was added a solution of the crude mixture in THF (50 mL) at 0 °C. The reaction mixture was stirred for 3 h and was quenched with H<sub>2</sub>O (1.6 mL) at 0 °C, followed by the addition of 1 N NaOH aq. (1.6 mL), and H<sub>2</sub>O (4.8 mL). After filtration through a pad of Celite, the filtrate was concentrated *in vacuo* and the residue (2.00 g) was used without further purification in the next step.

To a solution of the crude product in EtOH (30 mL) was added benzaldehyde (1.69 g, 16.0 mmol) at ambient temperature. The reaction mixture was stirred for 2 h at 70 °C, and then the reaction mixture was cooled to 0 °C. Subsequently, NaBH<sub>4</sub> (754 mg, 20 mmol) was added to the reaction mixture. After stirring for 4 h at ambient temperature, H<sub>2</sub>O (50 mL) was added to the mixture at 0 °C. The mixture was evaporated to remove EtOH. The organic material was extracted with Et<sub>2</sub>O (40 mL × 3) and the organic layers were dried over MgSO<sub>4</sub>. After filtration, the filtrate was concentrated *in vacuo* and the residue was purified by column chromatography on silica gel (CH<sub>2</sub>Cl<sub>2</sub>/MeOH = 4/1) to provide **1ae** (1.68 g, 6.99 mmol, 43% in 4 steps) as a colorless oil.

**1ae**: <sup>1</sup>H NMR (500 MHz, CDCl<sub>3</sub>): δ = 7.38-7.33 (m, 4H), 7.29-7.26 (m, 1H), 7.10 (d, *J* = 8.3 Hz, 2H), 6.60 (d, *J* = 8.3 Hz, 2H), 4.32 (d, *J* = 5.2 Hz, 2H), 4.00 (brs, 1H), 3.32 (s, 2H), 2.22 (s, 6H); <sup>13</sup>C NMR (125 MHz, CDCl<sub>3</sub>): δ = 147.2, 139.3, 130.2, 128.5, 127.4, 127.2, 127.0, 112.5, 63.7, 48.2, 44.9; HRMS (ESI<sup>+</sup>): Calcd. for [C<sub>16</sub>H<sub>20</sub>N<sub>2</sub>+H]<sup>+</sup>: *m/z* = 241.1699, Found: 241.1695.

### 2.3. 2-((1-Benzylpiperidin-4-yl)methyl)-5,6-dimethoxy-2,3-dihydro-1H-inden-1-one (**1ag**)

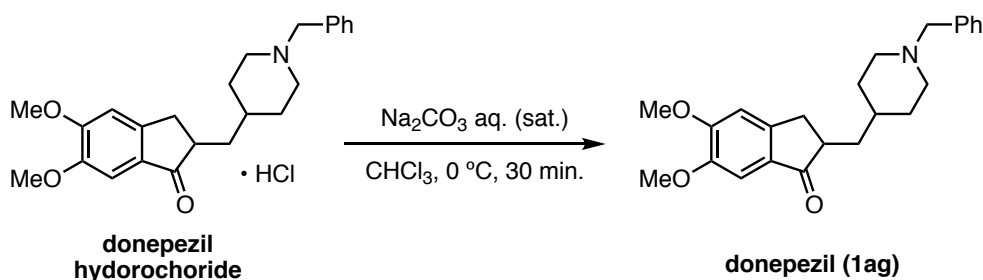

To a suspension of donepezile hydrochloride (1.0 g, 2.4 mmol) in CHCl<sub>3</sub> (200 mL) was added aqueous saturated Na<sub>2</sub>CO<sub>3</sub> (60 mL) at 0 °C. After stirring for 30 min at ambient temperature, the organic material was extracted with CHCl<sub>3</sub> (60 mL × 2). The combined organic layers were washed with brine and dried over MgSO<sub>4</sub>. After filtration, the filtrate was concentrated *in vacuo* to provide donepezil (**1ag**) (100%, 910 mg, 2.4 mmol) as a white solid.

<sup>1</sup>H NMR (500 MHz, CDCl<sub>3</sub>): δ = 7.32-7.30 (m, 4H), 7.26-7.23 (m, 1H), 7.17 (s, 1H), 6.85 (s, 1H), 3.96 (s, 3H), 3.91 (s, 3H), 3.51 (s, 2H), 3.23 (dd, *J* = 8.0, 17.8 Hz, 1H), 2.92-2.88 (m, 2H), 2.72-2.68 (m, 2H), 2.00-1.89 (m, 3H), 1.75-1.65 (m, 2H), 1.53-1.46 (m, 1H), 1.41-1.29

(m, 3H);  $^{13}\text{C}$  NMR (125 MHz,  $\text{CDCl}_3$ ):  $\delta$  = 207.8, 155.4, 149.4, 148.7, 138.5, 129.3, 129.2, 128.1, 126.8, 107.3, 104.3, 63.4, 56.2, 56.1, 53.8, 53.8, 45.4, 38.7, 34.5, 33.3, 33.0, 31.8; HRMS ( $\text{ESI}^+$ ): Calcd. for  $[\text{C}_{24}\text{H}_{29}\text{NO}_3+\text{H}]^+$ :  $m/z$  = 380.2220, Found: 380.2221.

#### 2.4. Methyl (*S*)-(+)-2-(2-chlorophenyl)-2-(6,7-dihydro-4*H*-thieno[3,2-*c*]pyridin-5-yl)-acetate (**1ah**)

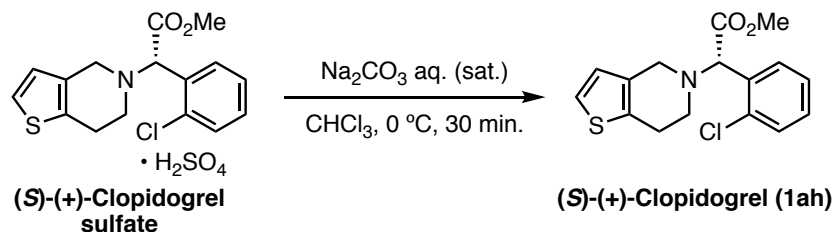

According to the above procedure (section 2.3.), (*S*)-(+)-clopidogrel sulfate (1.0 g, 2.4 mmol) was treated with aqueous saturated  $\text{Na}_2\text{CO}_3$  to afford **1ah** (92%, 720 mg, 2.2 mmol) as a colorless oil.

$^1\text{H}$  NMR (500 MHz,  $\text{CDCl}_3$ ):  $\delta$  = 7.70 (dd,  $J$  = 2.0, 7.2 Hz, 1H), 7.41 (dd,  $J$  = 1.7, 7.5 Hz, 1H), 7.31-7.26 (m, 2H), 7.06 (d,  $J$  = 5.2 Hz, 1H), 6.67 (d,  $J$  = 5.2 Hz, 1H), 4.92 (s, 1H), 3.76 (d,  $J$  = 14.3 Hz, 1H), 3.73 (s, 3H), 3.63 (d,  $J$  = 14.3 Hz, 1H), 2.88 (brs, 4H);  $^{13}\text{C}$  NMR (125 MHz,  $\text{CDCl}_3$ ):  $\delta$  = 171.2, 134.6, 133.7, 133.2, 133.1, 129.9, 129.7, 129.3, 127.1, 125.1, 122.7, 67.8, 50.6, 48.2, 25.4; HRMS ( $\text{ESI}^+$ ): Calcd. for  $[\text{C}_{23}\text{H}_{19}\text{ClN}_2\text{O}_2\text{S}+\text{H}]^+$ :  $m/z$  = 322.0663, Found: 322.0671.

### 3. C–H arylation with Ir complex under photo-irradiation

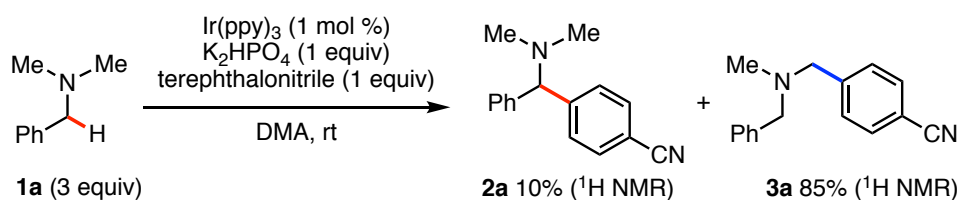

#### 3.1. Experimental procedure

An oven-dried 5 mL Schlenk flask equipped with a Teflon septum and a magnetic stir bar was charged with Ir(ppy)<sub>3</sub> (tris[2-phenylpyridinato-C<sup>2</sup>,N]iridium(III), 1.3 mg, 1.0 mol %), terephthalonitrile (25.6 mg, 0.2 mmol, 1.0 equiv) and K<sub>2</sub>HPO<sub>4</sub> (34.8 mg, 1.0 mmol, 1.0 equiv). The flask was purged with a stream of argon, and DMA (1.0 mL) and *N,N*-dimethylbenzylamine (0.6 mmol, 3.0 equiv) were added to the flask. The reaction mixture was then degassed with a Freeze-Pump-Thaw cycling (3 cycles) and the flask was backfilled with argon. Then, the flask was sealed with a screw cap and was placed on a stirrer (approximately 2 cm away from a 3 W blue LED (425 nm)). After being stirred for 12 h at room temperature, the reaction mixture was diluted with Et<sub>2</sub>O (5 mL) and the organic solution was washed with H<sub>2</sub>O and brine. The organic layer was dried over MgSO<sub>4</sub>. After filtration, the filtrate was concentrated *in vacuo* and the residue was purified by column chromatography on silica gel (*n*-hexane/EtOAc = 20/1) to give **2a** (3.3 mg, 7%) as a colorless solid and **3a** (38.8 mg, 82%) as a colorless oil.

##### 3.2.1. 1-(4-Cyanophenyl)-*N,N*-dimethyl-1-phenyl-methanamine (**2a**)

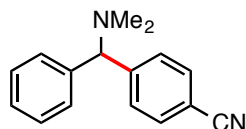

Colorless solid; 3.3 mg, 7% isolated yield; <sup>1</sup>H NMR (500 MHz, CDCl<sub>3</sub>): δ = 7.57 (s, 4H), 7.36 (d, *J* = 7.5 Hz, 2H), 7.30-7.27 (m, 2 H), 7.23-7.19 (m, 1H), 4.12 (s, 1H), 2.18 (s, 6H); <sup>13</sup>C NMR (125 MHz, CDCl<sub>3</sub>): δ = 149.1, 141.8, 132.4, 128.7, 128.3, 127.7, 127.5, 118.9, 110.6, 77.5, 44.5; IR (neat): 2820, 2774, 2226, 1607, 1491, 1452, 1016, 885, 729, 698 cm<sup>-1</sup>; HRMS (ESI<sup>+</sup>): Calcd. for [C<sub>16</sub>H<sub>16</sub>N<sub>2</sub>+H]<sup>+</sup>: *m/z* = 237.1386, Found: 237.1384.

##### 3.2.2. 4-((Benzyl(methyl)amino)methyl)benzonitrile (**3a**)

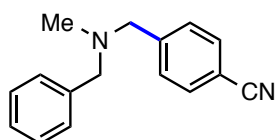

Colorless oil; 38.8 mg, 82% isolated yield; <sup>1</sup>H NMR (500 MHz, CDCl<sub>3</sub>): δ = 7.61 (d, *J* = 8.3 Hz, 2H), 7.48 (d, *J* = 8.3 Hz, 2H), 7.37-7.32 (m, 4 H), 7.28-7.24 (m, 1H), 3.55 (s, 2H), 3.54 (s, 2H), 2.18 (s, 3H); <sup>13</sup>C NMR (125 MHz, CDCl<sub>3</sub>): δ = 145.3, 138.8, 132.1, 129.3, 128.8, 128.3, 127.2, 119.0, 110.7, 62.0, 61.2, 42.3; IR (neat): 2789, 2226, 1607, 1495, 1452, 1366, 1018, 814, 737, 696 cm<sup>-1</sup>; HRMS (ESI<sup>+</sup>): Calcd. for [C<sub>16</sub>H<sub>16</sub>N<sub>2</sub>+H]<sup>+</sup>: *m/z* = 237.1386, Found: 237.1383.

## 4. Cyclic voltammetry

### 4.1. General experimental for cyclic voltammetry

Ferrocene was purified by recrystallisation twice from *n*-hexane prior to use. *n*-Bu<sub>4</sub>NPF<sub>6</sub> was used as supplied commercially from Aldrich. Unless otherwise stated, all solutions were prepared at 10.0 mM concentration (in 0.1 M *n*-Bu<sub>4</sub>NPF<sub>6</sub>/MeCN or DMA as solvent) using anhydrous CH<sub>3</sub>CN or DMA. Unless otherwise stated, a default scan rate of 100 mV s<sup>-1</sup> was used and potentials are given relative to the saturated calomel electrode (*vs.* SCE). Peak heights are given in amps (A). Ferrocene was used as an external standard, measured both before and after running any series of analytes, to ensure consistency. Measurements performed *vs.* Ag/AgCl were converted to *vs.* SCE by subtracting 45 mV. The anodic-cathodic peak separation for ferrocene  $\Delta E^p$  obtained was 117 mV (compared to 59 mV/n for an ideal one-electron transfer), indicating a high degree of reversibility (and so rapid kinetics) for the electron transfer process. For reductions, the sample was first degassed by Ar bubbling for 5 min. Cyclic voltammetry was conducted using a three-electrode setup consisting of a platinum wire working electrode (*d* = 1.60 mm) and platinum gauge counter electrode. The reference electrode was a Ag/AgCl electrode (containing 3.0 M NaCl saturated with AgCl). Electrochemical measurements were carried out in a 20 mL cell (SCV-3 Voltammetry cell) using BAS ALS660E potentiostat.

### 4.2. Results

The ferrocene peak height (*ca.* 7.0 × 10<sup>-5</sup> A) corresponds to a one-electron oxidation. All oxidations of analytes gave a similar peak height (*ca.* 3.5 × 10<sup>-5</sup> A to 7.0 × 10<sup>-5</sup> A) to ferrocene, corresponding to a one-electron oxidation (except Ir(ppy)<sub>3</sub> which was analyzed at 1.0 mM concentration and was not fully soluble at that concentration). No peaks were observed for electrochemical reductions of the substrates chosen.

#### 4.2.1. Results in CH<sub>3</sub>CN

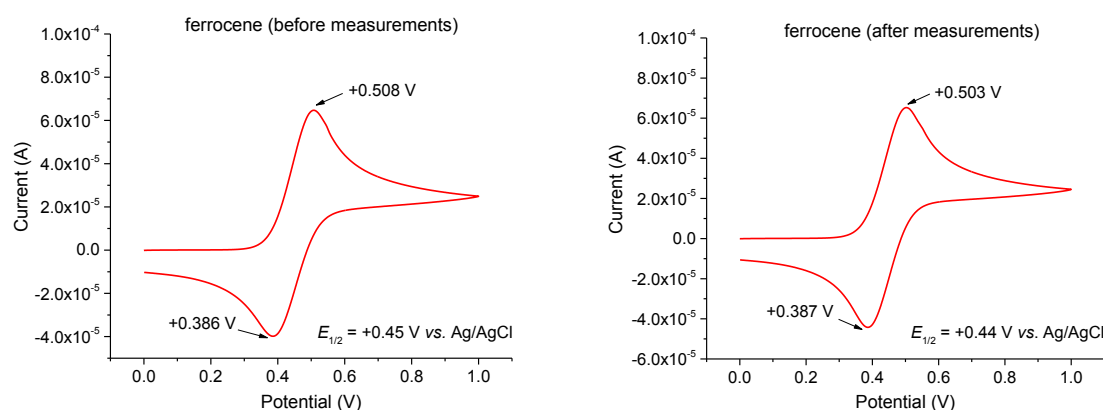

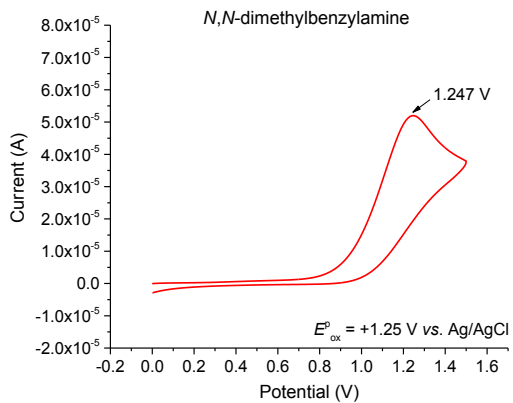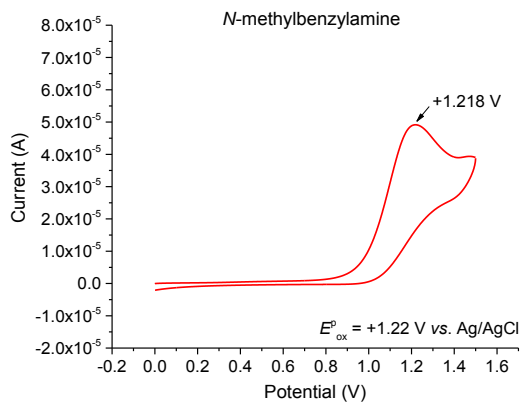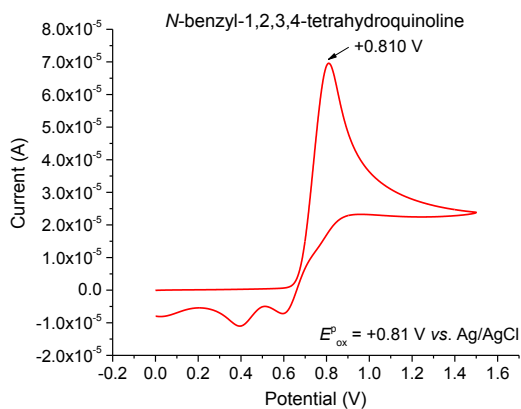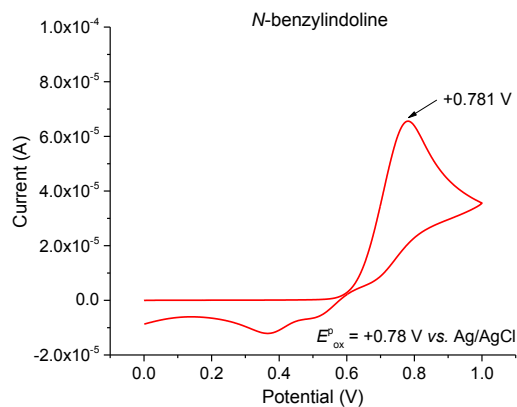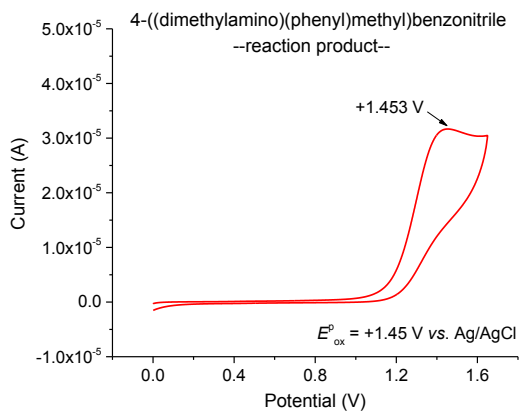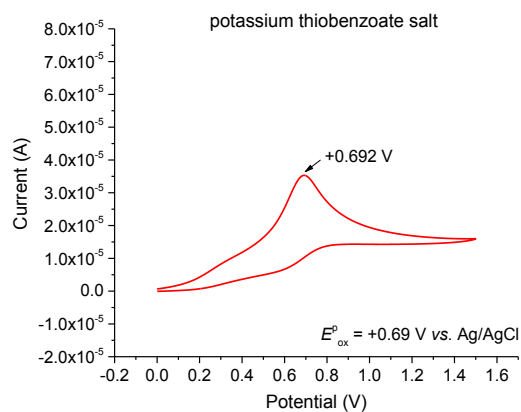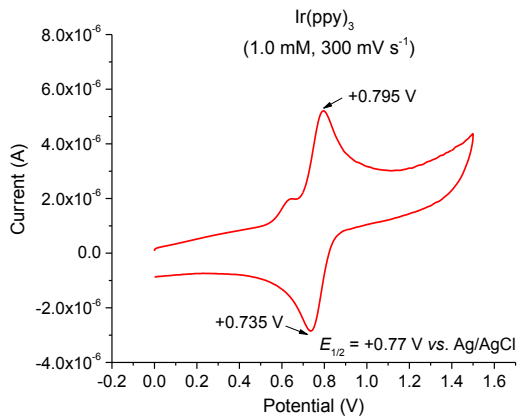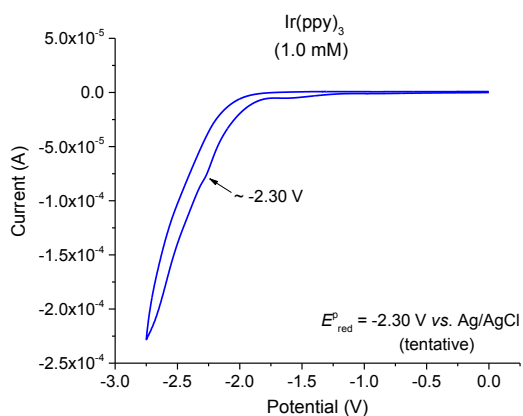



All CV data in CH<sub>3</sub>CN are summarised in Table S1 (these data have been converted from vs. Ag/AgCl as shown in Section 4.2.1. to vs. SCE in Table S1). Where possible, the data in the literature are shown for comparison (and calibrated to vs. SCE by using ferrocene, if necessary and if reported in the literature study). The reported redox potentials are quoted vs. SCE and are in good agreement with measured values herein. As far as possible, the redox potentials quoted have been obtained using the identical CV conditions (298 K, 0.1 M *n*-Bu<sub>4</sub>NPF<sub>6</sub> in CH<sub>3</sub>CN), but variations occur in some cases. Readers are referred to the literature referenced in Table S1 for details.

**Table S1:** Comparison of measured potentials in CH<sub>3</sub>CN with those in the literature .

| Entry | Redox active species                                  | $E$ (V vs. SCE) <sup>a</sup>                                                           | Literature $E_{1/2}$ (V vs. SCE)       |
|-------|-------------------------------------------------------|----------------------------------------------------------------------------------------|----------------------------------------|
| 1     | Ferrocene                                             | $E_{1/2} = +0.40$<br>( $E_{\text{ox}}^{\text{p}} = +0.46$ ) <sup>b</sup>               | +0.40 <sup>4</sup>                     |
| 2     | Ir(ppy) <sub>3</sub> (reduction to Ir <sup>II</sup> ) | $E_{1/2} = -2.29$<br>( $E_{\text{red}}^{\text{p1}} = \text{ca. } -2.35$ ) <sup>c</sup> | -2.19 <sup>5</sup>                     |
| 3     | Ir(ppy) <sub>3</sub> (oxidation to Ir <sup>IV</sup> ) | $E_{1/2} = +0.73$<br>( $E_{\text{ox}}^{\text{p}} = +0.79$ ) <sup>d</sup>               | +0.77 <sup>5</sup>                     |
| 4     | <i>N,N</i> -dimethylbenzylamine                       | $E_{\text{ox}}^{\text{p}} = +1.17$ <sup>e</sup>                                        | +0.92, <sup>6</sup> +1.01 <sup>7</sup> |
| 5     | <i>N</i> -methylbenzylamine                           | $E_{\text{ox}}^{\text{p}} = +1.17$                                                     | ca. +1.20 <sup>8</sup>                 |
| 6     | <i>N</i> -benzylindoline                              | $E_{\text{ox}}^{\text{p}} = +0.74$                                                     | -                                      |
| 7     | <i>N</i> -benzyl-1,2,3,4-tetrahydroquinoline          | $E_{\text{ox}}^{\text{p}} = +0.77$                                                     | -                                      |
| 8     | Reaction product from <i>N,N</i> -dimethylbenzylamine | $E_{\text{ox}}^{\text{p}} = +1.41$                                                     | -                                      |
| 9     | Potassium thiobenzoate salt                           | $E_{\text{ox}}^{\text{p}} = +0.65$                                                     | -                                      |

<sup>a</sup>Values are calibrated to ferrocene as an external standard, run before and after a set of analytes to ensure consistency. All values are in CH<sub>3</sub>CN vs. SCE. Where possible, both half potentials  $E_{1/2}$  and peak potentials  $E_{\text{p}}$  are given. All samples were measured vs. Ag/AgCl and were converted to vs. SCE by subtracting 45 mV. <sup>b</sup>Average of 6 measurements. <sup>c</sup>Since only the  $E_{\text{red}}^{\text{p}}$  could be observed in the CV measurement of the ground state, the value was converted to vs. SCE and then  $E_{1/2}$  was estimated by addition of 60 mV (the difference in potentials between  $E_{\text{ox}}^{\text{p}}$  and  $E_{1/2}$  for ferrocene) to  $E_{\text{red}}^{\text{p}}$ . <sup>d</sup>Calibrated by using ferrocene analyzed at 300 mV s<sup>-1</sup> and ferrocene analysed at 100 mV s<sup>-1</sup> to give values comparable at 100 mV s<sup>-1</sup>. <sup>e</sup>Average of 2 measurements.

## 4.2.2. Results in DMA

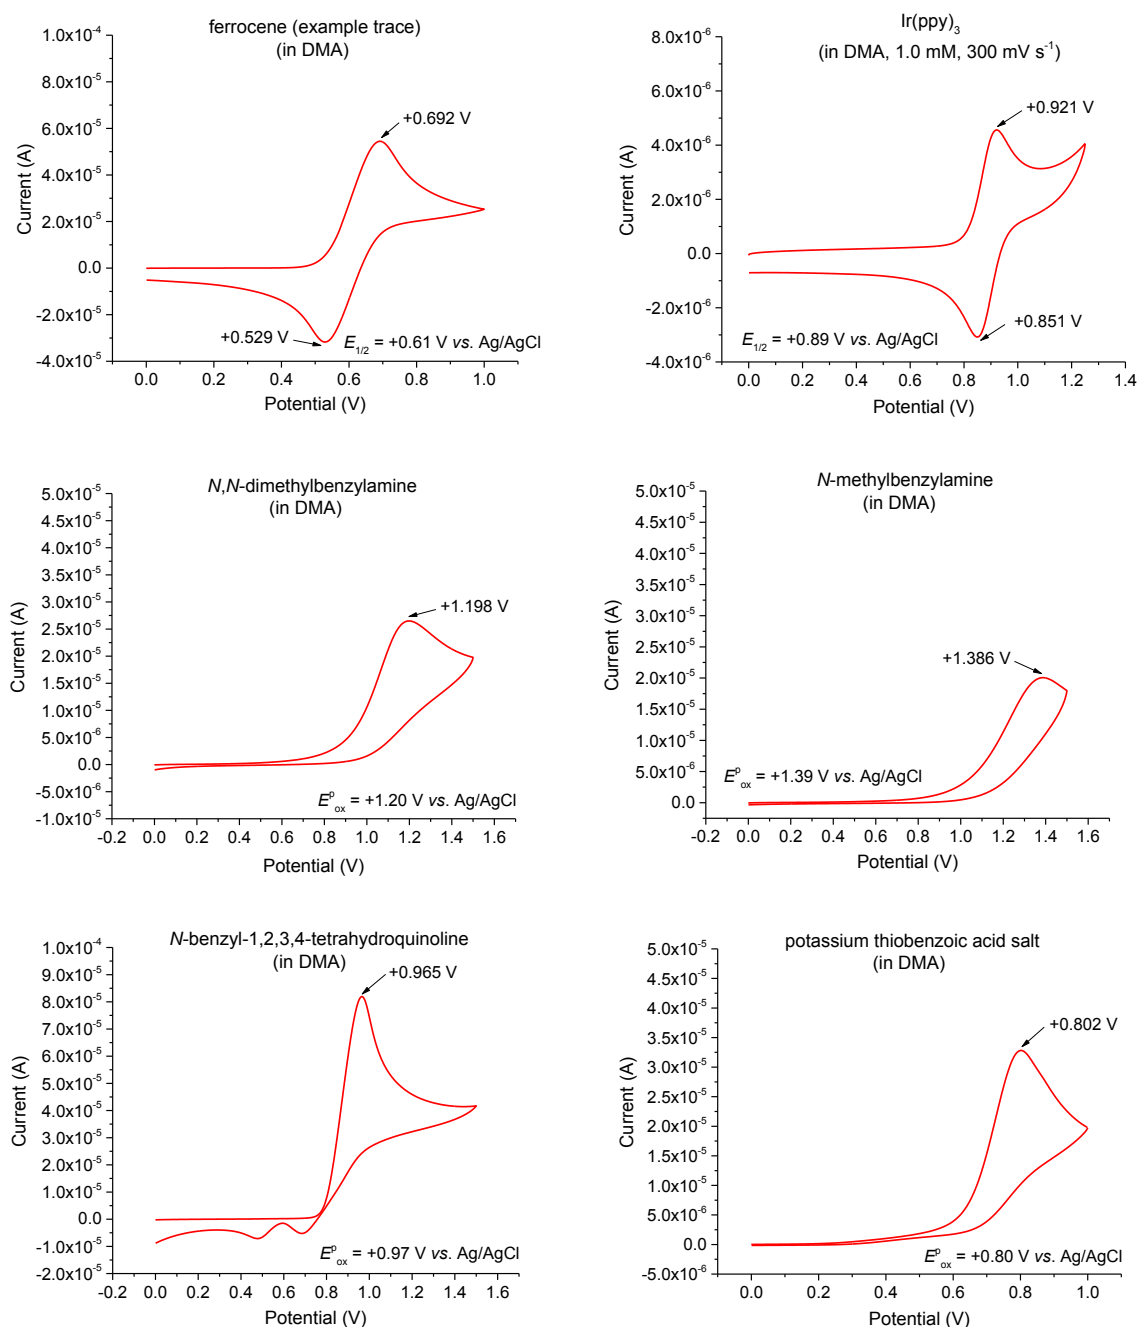

All CV data in DMA are summarised in Table S2. Where possible, the data in the literature are shown for comparison (and calibrated to vs. SCE by using ferrocene, if necessary and if reported in the literature study). The reported redox potentials are quoted vs. SCE. As far as possible, literature redox potentials quoted have been obtained using the identical CV conditions (298 K, 0.1 M *n*-Bu<sub>4</sub>NPF<sub>6</sub> in DMA), but variations occur in some cases. Readers are referred to the literature referenced in Table S2 for details.

**Table S2:** Comparison of measured potentials in DMA with those in the literature.

| Entry | Redox active species                                  | $E_{1/2}$ (V vs. SCE) <sup>a</sup>                        | Literature $E_{1/2}$ (V vs. SCE) |
|-------|-------------------------------------------------------|-----------------------------------------------------------|----------------------------------|
| 1     | Ferrocene                                             | +0.53 ( $E_{\text{ox}}^{\text{p}} = +0.65$ ) <sup>b</sup> | +0.55 <sup>9</sup>               |
| 2     | Ir(ppy) <sub>3</sub> (oxidation to Ir <sup>IV</sup> ) | +0.84 ( $E_{\text{ox}}^{\text{p}} = +0.92$ ) <sup>c</sup> | -                                |
| 3     | <i>N,N</i> -dimethylbenzylamine                       | $E_{\text{ox}}^{\text{p}} = +1.15$                        | -                                |
| 4     | <i>N</i> -methylbenzylamine                           | $E_{\text{ox}}^{\text{p}} = +1.34$                        | -                                |
| 5     | <i>N</i> -benzyl-1,2,3,4-tetrahydroquinoline          | $E_{\text{ox}}^{\text{p}} = +0.92$                        | -                                |
| 6     | Potassium thiobenzoate salt                           | $E_{\text{ox}}^{\text{p}} = +0.76$                        | +0.72 <sup>10</sup>              |

<sup>a</sup>Values are calibrated to ferrocene as an external standard, run before and after a set of analytes to ensure consistency. Unless otherwise stated, all values are half-wave potentials ( $E_{1/2}$ ) in DMA vs. SCE. All samples were measured vs. Ag/AgCl and were converted to vs. SCE by subtracting 45 mV. <sup>b</sup>Average of 2 measurements. <sup>c</sup>Calibrated by using ferrocene analyzed at 300 mV s<sup>-1</sup> and ferrocene analysed at 100 mV s<sup>-1</sup> to give values comparable at 100 mV s<sup>-1</sup>.

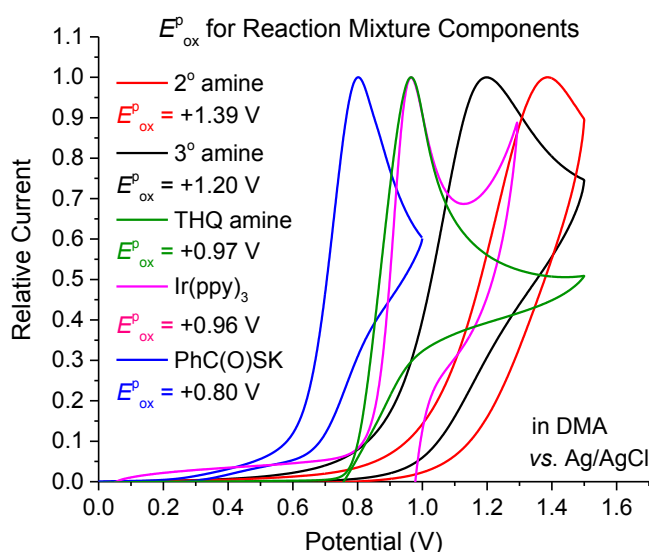

### 4.3. Comparison of the measured potentials of the above compounds

The above results clearly show that potassium thiobenzoate salt undergoes most facile oxidation under the reaction conditions. The *N*-benzyl-1,2,3,4-tetrahydroquinoline has an  $E_{\text{ox}}^{\text{p}}$  value almost identical to that of Ir(ppy)<sub>3</sub>, however the potassium thiobenzoate salt is present under the reaction conditions. The difference in the observed reaction selectivity between *N*-benzyl-1,2,3,4-tetrahydroquinoline and *N*-benzylindoline cannot be explained by the change

in reaction mechanism to SET only catalysis, since these compounds have almost identical  $E^{\text{p}}_{\text{ox}}$  values in MeCN. The SET/HAT synergistic catalytic mechanism is occurring for these substrates (not oxidation by  $[\text{Ir}(\text{ppy})_3]^{4+}$ ) and the change in the reaction selectivity must be attributed to either sterics, BDEs or conformation of the 5-/6-/7-membered rings to allow the formation of the 2°  $\alpha$ -amino radical (See, Scheme 3B).

## 5. Screening of the reaction conditions for benzylic C–H arylation

**Table S3:** Optimization of the reaction conditions.<sup>a</sup>

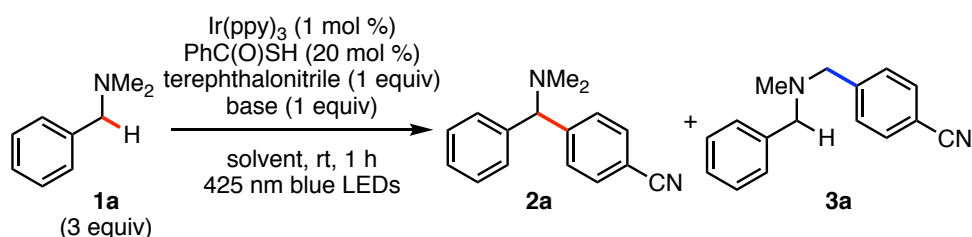

| entry             | base                     | solvent                  | yield (%) <sup>b</sup> | <b>2a</b> : <b>3a</b> <sup>b</sup> |
|-------------------|--------------------------|--------------------------|------------------------|------------------------------------|
| 1                 | $\text{K}_2\text{HPO}_4$ | DMA                      | 93                     | > 20 : 1                           |
| 2                 | $\text{K}_3\text{PO}_4$  | DMA                      | 85                     | > 20 : 1                           |
| 3                 | KOAc                     | DMA                      | 89                     | > 20 : 1                           |
| 4                 | $\text{K}_2\text{CO}_3$  | DMA                      | 91                     | > 20 : 1                           |
| 5                 | $\text{Na}_2\text{CO}_3$ | DMA                      | 90                     | > 20 : 1                           |
| 6                 | $\text{K}_2\text{HPO}_4$ | DMF                      | 89                     | > 20 : 1                           |
| 7                 | $\text{K}_2\text{HPO}_4$ | $\text{CH}_3\text{CN}$   | 31                     | > 20 : 1                           |
| 8                 | $\text{K}_2\text{HPO}_4$ | acetone                  | 23                     | > 20 : 1                           |
| 9                 | $\text{K}_2\text{HPO}_4$ | THF                      | trace                  | –                                  |
| 10                | $\text{K}_2\text{HPO}_4$ | $\text{CH}_2\text{Cl}_2$ | 23                     | > 20 : 1                           |
| 11 <sup>c</sup>   | $\text{K}_2\text{HPO}_4$ | DMA                      | 90 (87) <sup>d</sup>   | > 20 : 1                           |
| 12 <sup>c,e</sup> | $\text{K}_2\text{HPO}_4$ | DMA                      | no reaction            |                                    |

<sup>a</sup>The reactions were carried out on a 0.2 mmol scale. <sup>b</sup>Yield and regioisomeric ratio were determined by <sup>1</sup>H NMR analysis using 1,1,2,2-tetrachloroethane as an internal standard. <sup>c</sup>Run with  $\text{Ir}(\text{ppy})_3$  (0.5 mol %), thiobenzoic acid (1 mol %), and **1a** (2 equiv) for 2 h. <sup>d</sup>Isolated yield. <sup>e</sup>Run under the dark conditions.

## 6. Benzylic C–H arylation under SET-HAT synergistic catalysis

### 6.1. Typical experimental procedure for the benzylic arylation of benzylamines

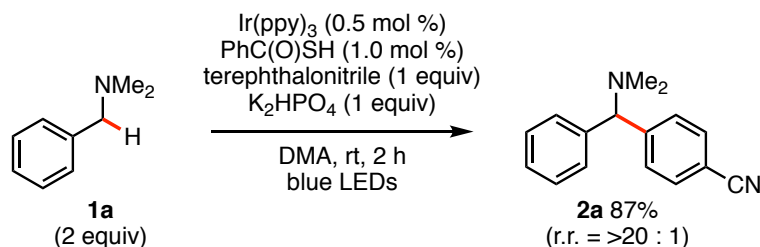

An oven-dried 25 mL Schlenk flask equipped with a Teflon septum and a magnetic stir bar was charged with Ir(ppy)<sub>3</sub> (tris[2-phenylpyridinato-C<sup>2</sup>,N] iridium(III), 3.3 mg, 0.5 mol %), terephthalonitrile (128.1 mg, 1.0 mmol, 1.0 equiv) and K<sub>2</sub>HPO<sub>4</sub> (174.2 mg, 1.0 mmol, 1.0 equiv). The flask was purged with a stream of argon, and a DMA solution (5 mL) of *N,N*-dimethylbenzylamine (300  $\mu$ L, 2 mmol, 2.0 equiv) and thiobenzoic acid (1.2  $\mu$ L, 1 mol %) was added to the flask. The reaction mixture was then degassed with a Freeze-Pump-Thaw cycling (3 cycles) and the flask was backfilled with argon. Then, the flask was sealed with a screw cap and was placed on a stirrer (approximately 2 cm away from a 3 W blue LED (425 nm)). After stirring for 2 h at room temperature, the reaction mixture was diluted with Et<sub>2</sub>O (5 mL) and the organic solution was washed with aqueous saturated NaHCO<sub>3</sub> and brine. The organic layer was dried over MgSO<sub>4</sub>. After filtration, the filtrate was concentrated *in vacuo* and the residue was purified by column chromatography on silica gel (*n*-hexane/EtOAc = 20/1) to give **2a** (205.6 mg, 87% yield) as a colorless solid.

#### 6.2.1. 1-(4-Cyanophenyl)-*N,N*-dimethyl-1-(4-methoxyphenyl)methanamine (**2b**)

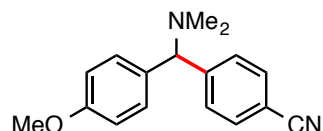

Colorless solid; 234.4 mg, 88% isolated yield; <sup>1</sup>H NMR (500 MHz, CDCl<sub>3</sub>):  $\delta$  = 7.57 (d, *J* = 8.6 Hz, 2H), 7.54 (d, *J* = 8.6 Hz, 2H), 7.26 (d, *J* = 9.2 Hz, 2H), 6.82 (d, *J* = 9.2 Hz, 2H), 4.08 (s, 1H), 3.76 (s, 3H), 2.17 (s, 6H); <sup>13</sup>C NMR (125 MHz, CDCl<sub>3</sub>):  $\delta$  = 158.8, 149.5, 133.9, 132.3, 128.8, 128.1, 118.9, 114.0, 110.4, 76.7, 55.2, 44.5; IR (neat): 2957, 2810, 2769, 2227, 2158, 2031, 1977, 1607, 1512, 1240, 1029, 887, 812 cm<sup>-1</sup>; HRMS (ESI<sup>+</sup>): Calcd. for [C<sub>17</sub>H<sub>18</sub>N<sub>2</sub>O+H]<sup>+</sup>: *m/z* = 267.1492, Found: 267.1492.

#### 6.2.2. 1-(4-Chlorophenyl)-1-(4-cyanophenyl)-*N,N*-dimethyl-methanamine (**2c**)

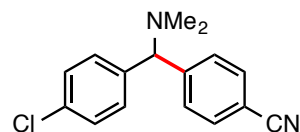

Colorless solid; 181.4 mg, 67% isolated yield; <sup>1</sup>H NMR (500 MHz, CDCl<sub>3</sub>):  $\delta$  = 7.58 (d, *J* = 8.0 Hz, 2H), 7.52 (d, *J* = 8.0 Hz, 2H), 7.30 (d, *J* = 8.6 Hz, 2H), 7.26 (d, *J* = 8.6 Hz, 2H), 4.11

(s, 1H), 2.17 (s, 6H);  $^{13}\text{C}$  NMR (125 MHz,  $\text{CDCl}_3$ ):  $\delta = 148.5, 140.4, 133.1, 132.4, 129.0, 128.9, 128.2, 118.7, 110.8, 76.6, 44.4$ ; IR (neat): 2776, 2228, 2100, 1607, 1487, 1406, 1089, 1012, 889, 812  $\text{cm}^{-1}$ ; HRMS (ESI $^+$ ): Calcd. for  $[\text{C}_{16}\text{H}_{15}\text{ClN}_2+\text{H}]^+$ :  $m/z = 271.0997$ , Found: 271.0994.

### 6.2.3. 1-(4-Bromophenyl)-1-(4-cyanophenyl)-*N,N*-dimethyl-methanamine (2d)

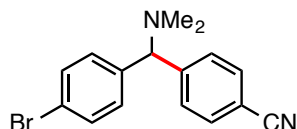

Colorless solid; 192.3 mg, 61% isolated yield;  $^1\text{H}$  NMR (500 MHz,  $\text{CDCl}_3$ ):  $\delta = 7.58$  (d,  $J = 8.3$  Hz, 2H), 7.52 (d,  $J = 8.3$  Hz, 2H), 7.42 (d,  $J = 8.6$  Hz, 2H), 7.25 (d,  $J = 8.6$  Hz, 2H), 4.10 (s, 1H), 2.17 (s, 6H);  $^{13}\text{C}$  NMR (125 MHz,  $\text{CDCl}_3$ ):  $\delta = 148.4, 140.9, 132.4, 131.8, 129.3, 128.2, 121.2, 118.7, 110.9, 76.6, 44.4$ ; IR (neat): 2949, 2874, 2783, 2228, 1607, 1487, 1474, 1460, 1402, 1169, 1009, 891, 808  $\text{cm}^{-1}$ ; HRMS (ESI $^+$ ): Calcd. for  $[\text{C}_{16}\text{H}_{15}\text{BrN}_2+\text{H}]^+$ :  $m/z = 315.0491$ , Found: 315.0490.

### 6.2.4. 1-(4-Cyanophenyl)-*N,N*-dimethyl-1-(naphthalen-2-yl)methanamine (2e)

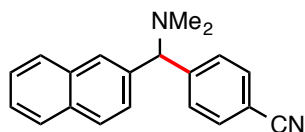

Colorless solid; 160.4mg, 56% isolated yield;  $^1\text{H}$  NMR (500 MHz,  $\text{CDCl}_3$ ):  $\delta = 7.81$ -7.76 (m, 4H), 7.63 (d,  $J = 8.3$  Hz, 2H), 7.57 (d,  $J = 8.3$  Hz, 2H), 7.51 (dd,  $J = 1.7, 8.6$  Hz, 1H), 7.48-7.42 (m, 2H), 4.30 (s, 1H), 2.24 (s, 6H);  $^{13}\text{C}$  NMR (125 MHz,  $\text{CDCl}_3$ ):  $\delta = 148.9, 139.4, 133.3, 132.8, 132.4, 128.6, 128.4, 127.8, 127.6, 126.6, 126.2, 126.0, 125.3, 118.8, 110.7, 77.6, 44.6$ ; IR (neat): 3075, 2820, 2770, 2224, 1607, 1503, 1456, 1269, 1028, 899, 818  $\text{cm}^{-1}$ ; HRMS (ESI $^+$ ): Calcd. for  $[\text{C}_{20}\text{H}_{18}\text{N}_2+\text{H}]^+$ :  $m/z = 287.1543$ , Found: 287.1538.

### 6.2.5. 1-(4-Cyanophenyl)-*N,N*-dimethyl-1-(*p*-tolyl)methanamine (2f)

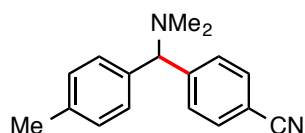

Colorless oil; 240.3 mg, 96% isolated yield;  $^1\text{H}$  NMR (500 MHz,  $\text{CDCl}_3$ ):  $\delta = 7.56$  (s, 4H), 7.24 (d,  $J = 7.7$  Hz, 2H), 7.10 (d,  $J = 7.7$  Hz, 2H), 4.08 (s, 1H), 2.29 (s, 3H), 2.18 (s, 6H);  $^{13}\text{C}$  NMR (125 MHz,  $\text{CDCl}_3$ ):  $\delta = 149.4, 138.8, 137.1, 132.3, 129.4, 128.2, 127.6, 118.9, 110.5, 77.1, 44.5, 21.0$ ; IR (neat): 2987, 2951, 2818, 2774, 2226, 1605, 1501, 1456, 1410, 1252, 1182, 1016, 889, 810  $\text{cm}^{-1}$ ; HRMS (ESI $^+$ ): Calcd. for  $[\text{C}_{17}\text{H}_{18}\text{N}_2+\text{H}]^+$ :  $m/z = 251.1543$ , Found: 251.1540.

### 6.2.6. 1-(4-Cyanophenyl)-*N,N*-dimethyl-1-(*o*-tolyl)methanamine (2g)

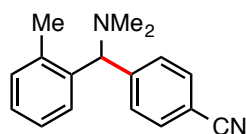

Colorless oil; 187.8 mg, 75% isolated yield;  $^1\text{H}$  NMR (500 MHz,  $\text{CDCl}_3$ ):  $\delta$  = 7.66 (d,  $J$  = 8.0 Hz, 1H), 7.56 (d,  $J$  = 8.6 Hz, 2H), 7.53 (d,  $J$  = 8.6 Hz, 2H), 7.23-7.20 (m, 1H), 7.13-7.07 (m, 2H), 4.35 (s, 1H), 2.36 (s, 3H), 2.18 (s, 6H);  $^{13}\text{C}$  NMR (125 MHz,  $\text{CDCl}_3$ ):  $\delta$  = 148.4, 140.1, 135.4, 132.2, 130.7, 128.9, 127.2, 127.0, 126.5, 118.8, 110.6, 72.3, 44.7, 20.0; IR (neat): 2988, 2951, 2818, 2771, 2226, 1605, 1458, 1016, 891, 745  $\text{cm}^{-1}$ ; HRMS ( $\text{ESI}^+$ ): Calcd. for  $[\text{C}_{17}\text{H}_{18}\text{N}_2+\text{H}]^+$ :  $m/z$  = 251.1543, Found: 251.1545.

### 6.2.7. 1-(4-Cyanophenyl)-*N,N*-dimethyl-1-phenyl-ethanamine (2h)

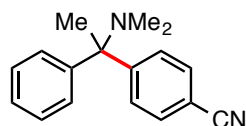

Colorless solid; 185.3 mg, 74% isolated yield;  $^1\text{H}$  NMR (500 MHz,  $\text{CDCl}_3$ ):  $\delta$  = 7.62 (d,  $J$  = 8.6 Hz, 2H), 7.57 (d,  $J$  = 8.6 Hz, 2H), 7.39 (d,  $J$  = 7.5 Hz, 2H), 7.31-7.27 (m, 2H), 7.21-7.19 (m, 1H), 2.13 (s, 6H), 1.75 (s, 3H);  $^{13}\text{C}$  NMR (125 MHz,  $\text{CDCl}_3$ ):  $\delta$  = 152.2, 143.9, 131.7, 128.2, 128.0, 127.5, 126.6, 119.0, 109.8, 67.0, 39.7, 18.8; IR (neat): 2982, 2945, 2822, 2778, 2224, 1605, 1443, 1215, 1045, 959, 858, 694  $\text{cm}^{-1}$ ; HRMS ( $\text{ESI}^+$ ): Calcd. for  $[\text{C}_{17}\text{H}_{18}\text{N}_2+\text{H}]^+$ :  $m/z$  = 251.1543, Found: 251.1539.

### 6.2.8. 1-(4-Cyanophenyl)-*N,N*-diethyl-1-phenyl-methanamine (2i)

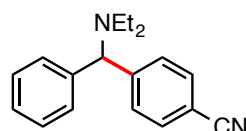

Colorless oil; 232.6 mg, 88% isolated yield;  $^1\text{H}$  NMR (500 MHz,  $\text{CDCl}_3$ ):  $\delta$  = 7.56 (s, 4H), 7.35 (d,  $J$  = 7.5 Hz, 2H), 7.30-7.27 (m, 2H), 7.22-7.20 (m, 1H), 4.75 (s, 1H), 2.60-2.48 (m, 4H), 0.97 (t,  $J$  = 6.9 Hz, 6H);  $^{13}\text{C}$  NMR (125 MHz,  $\text{CDCl}_3$ ):  $\delta$  = 150.7, 140.3, 131.9, 128.3, 128.3, 128.2, 126.8, 119.1, 110.3, 57.6, 53.8, 42.9, 15.0, 12.1; IR (neat): 2968, 2226, 1607, 1491, 1452, 1373, 1165, 1053, 912, 812, 729, 698  $\text{cm}^{-1}$ ; HRMS ( $\text{ESI}^+$ ): Calcd. for  $[\text{C}_{18}\text{H}_{20}\text{N}_2+\text{H}]^+$ :  $m/z$  = 265.1699, Found: 265.1695.

### 6.2.9. *N*-((4-Cyanophenyl)(phenyl)methyl)-pyrrolidine (2j)

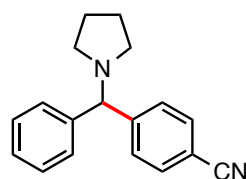

Colorless oil; 251.9 mg, 96% isolated yield;  $^1\text{H}$  NMR (500 MHz,  $\text{CDCl}_3$ ):  $\delta$  = 7.59 (d,  $J$  = 8.6 Hz, 2H), 7.56 (d,  $J$  = 8.6 Hz, 2H), 7.40 (d,  $J$  = 7.5 Hz, 2H), 7.29-7.26 (m, 2H), 7.21-7.18 (m, 1H), 4.21 (s, 1H), 2.40 (brs, 4H), 1.78-1.77 (m, 4H);  $^{13}\text{C}$  NMR (125 MHz,  $\text{CDCl}_3$ ):  $\delta$  = 149.7, 142.8, 132.3, 128.6, 128.1, 127.4, 127.3, 118.9, 110.5, 75.9, 53.4, 23.5; IR (neat): 2967, 2787, 2226, 1607, 1491, 1452, 1128, 893, 812, 729  $\text{cm}^{-1}$ ; HRMS (ESI $^+$ ): Calcd. for  $[\text{C}_{18}\text{H}_{18}\text{N}_2+\text{H}]^+$ :  $m/z$  = 263.1543, Found: 263.1538.

#### 6.2.10. *N*-((4-Cyanophenyl)(phenyl)methyl)-piperidine (2k)

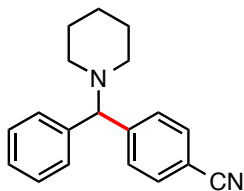

Colorless solid; 246.0 mg, 89% isolated yield;  $^1\text{H}$  NMR (500 MHz,  $\text{CDCl}_3$ ):  $\delta$  = 7.56 (d,  $J$  = 8.6 Hz, 2H), 7.54 (d,  $J$  = 8.6 Hz, 2H), 7.34-7.32 (m, 2H), 7.29-7.26 (m, 2H), 7.22-7.19 (m, 1H), 4.28 (s, 1H), 2.29 (brs, 4H), 1.59-1.55 (m, 4H), 1.46-1.42 (m, 2H);  $^{13}\text{C}$  NMR (125 MHz,  $\text{CDCl}_3$ ):  $\delta$  = 149.1, 141.5, 132.2, 128.6, 128.5, 128.0, 127.3, 119.0, 110.4, 76.3, 53.0, 26.1, 24.5; IR (neat): 2945, 2916, 2799, 2231, 1607, 1489, 1450, 1256, 1095, 991, 877, 820, 727  $\text{cm}^{-1}$ ; HRMS (ESI $^+$ ): Calcd. for  $[\text{C}_{19}\text{H}_{20}\text{N}_2+\text{H}]^+$ :  $m/z$  = 277.1699, Found: 277.1696.

#### 6.2.11. *N*-((4-Cyanophenyl)(phenyl)methyl)-morpholine (2l)

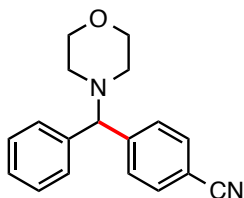

Colorless oil; 200.4 mg, 72% isolated yield;  $^1\text{H}$  NMR (500 MHz,  $\text{CDCl}_3$ ):  $\delta$  = 7.58 (s, 4H), 7.37-7.35 (m, 2H), 7.31-7.28 (m, 2H), 7.24-7.20 (m, 1H), 4.26 (s, 1H), 3.72 (t,  $J$  = 4.9 Hz, 4H), 2.40-2.34 (m, 4H);  $^{13}\text{C}$  NMR (125 MHz,  $\text{CDCl}_3$ ):  $\delta$  = 148.0, 140.6, 132.4, 128.8, 128.5, 127.9, 127.6, 118.7, 110.8, 76.2, 67.0, 52.4; IR (neat): 2957, 2851, 2806, 2226, 1607, 1450, 1277, 1115, 1011, 876, 729  $\text{cm}^{-1}$ ; HRMS (ESI $^+$ ): Calcd. for  $[\text{C}_{18}\text{H}_{18}\text{N}_2\text{O}+\text{H}]^+$ :  $m/z$  = 279.1492, Found: 279.1488.

#### 6.2.12. 1-((4-Cyanophenyl)(phenyl)methyl)-4-methylpiperazine (2m)

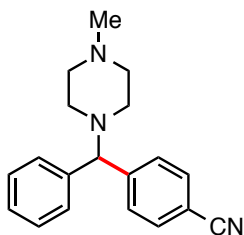



Colorless oil; 209.8 mg, 72% isolated yield;  $^1\text{H}$  NMR (500 MHz,  $\text{CDCl}_3$ ):  $\delta$  = 7.56 (s, 4H), 7.36-7.34 (m, 2H), 7.30-7.26 (m, 2H), 7.22-7.19 (m, 1H), 4.27 (s, 1H), 2.42 (brs, 8H), 2.29 (s, 3H);  $^{13}\text{C}$  NMR (125 MHz,  $\text{CDCl}_3$ ):  $\delta$  = 148.5, 141.1, 132.4, 128.7, 128.4, 127.9, 127.5, 118.8, 110.6, 75.8, 55.2, 51.8, 45.9; IR (neat): 2936, 2795, 2226, 1607, 1452, 1290, 1157, 1142, 1009, 912, 812, 729  $\text{cm}^{-1}$ ; HRMS (ESI $^+$ ): Calcd. for  $[\text{C}_{19}\text{H}_{21}\text{N}_3+\text{H}]^+$ :  $m/z$  = 292.1808, Found: 292.1802.

#### 6.2.13. 1-(4-Cyanophenyl)-2-methyl-1,2,3,4-tetrahydroisoquinoline (2n)

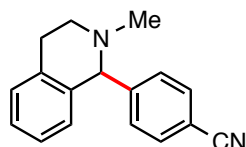

Colorless solid; 233.4 mg, 94% isolated yield;  $^1\text{H}$  NMR (500 MHz,  $\text{CDCl}_3$ ):  $\delta$  = 7.61 (d,  $J$  = 8.3 Hz, 2H), 7.42 (d,  $J$  = 8.3 Hz, 2H), 7.15-7.10 (m, 2H), 7.01-6.98 (m, 1H), 6.54 (d,  $J$  = 7.5 Hz, 1H), 4.31 (s, 1H), 3.28-3.22 (m, 1H), 3.11 (ddd,  $J$  = 2.9, 5.4, 11.5, 1H), 2.85-2.80 (m, 1H), 2.65 (ddd,  $J$  = 4.0, 11.5, 11.5 Hz, 1H), 2.22 (s, 3H);  $^{13}\text{C}$  NMR (125 MHz,  $\text{CDCl}_3$ ):  $\delta$  = 149.9, 137.1, 134.3, 132.1, 130.2, 128.6, 128.2, 126.3, 125.8, 118.9, 111.1, 71.0, 52.0, 44.3, 29.4; IR (neat): 2785, 2766, 2693, 2226, 1601, 1493, 1450, 1284, 1128, 1095, 1031, 887, 826, 739  $\text{cm}^{-1}$ ; HRMS (ESI $^+$ ): Calcd. for  $[\text{C}_{17}\text{H}_{16}\text{N}_2+\text{H}]^+$ :  $m/z$  = 249.1386, Found: 249.1385.

#### 6.2.14. 1-(4-Cyanophenyl)-*N*-methyl-1-phenylmethanamine (2o)

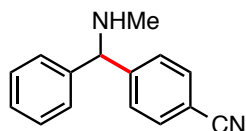

Colorless oil; 217.8 mg, 98% isolated yield;  $^1\text{H}$  NMR (500 MHz,  $\text{CDCl}_3$ ):  $\delta$  = 7.59 (d,  $J$  = 8.6 Hz, 2H), 7.54 (d,  $J$  = 8.6 Hz, 2H), 7.35-7.30 (m, 4H), 7.26-7.22 (m, 1H), 4.73 (s, 1H), 2.40 (s, 3H);  $^{13}\text{C}$  NMR (125 MHz,  $\text{CDCl}_3$ ):  $\delta$  = 149.3, 142.7, 132.3, 128.7, 127.9, 127.5, 127.1, 118.9, 110.6, 69.2, 34.9; IR (neat): 2847, 2791, 2226, 1607, 1491, 1452, 1126, 1018, 874, 816, 729, 700  $\text{cm}^{-1}$ ; HRMS (ESI $^+$ ): Calcd. for  $[\text{C}_{15}\text{H}_{14}\text{N}_2+\text{H}]^+$ :  $m/z$  = 223.1230, Found: 223.1228.

#### 6.2.15. (4-Cyanophenyl)(phenyl)methanamine (2p)

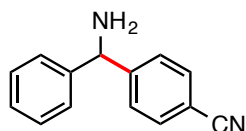

Colorless solid; 204.1 mg, 98% isolated yield;  $^1\text{H}$  NMR (500 MHz,  $\text{CDCl}_3$ ):  $\delta$  = 7.61 (d,  $J$  = 8.5 Hz, 2H), 7.53 (d,  $J$  = 8.5 Hz, 2H), 7.34-7.33 (m, 4H), 7.28-7.24 (m, 1H), 5.26 (s, 1H), 1.77 (brs, 2H);  $^{13}\text{C}$  NMR (125 MHz,  $\text{CDCl}_3$ ):  $\delta$  = 150.7, 144.3, 132.0, 128.6, 127.5, 127.4, 126.7, 118.8, 110.5, 59.4; IR (neat): 3374, 3028, 2837, 2224, 1601, 1492, 1450, 1406, 1275,

1186, 921, 893, 853, 752  $\text{cm}^{-1}$ ; HRMS (ESI<sup>+</sup>): Calcd. for  $[\text{C}_{14}\text{H}_{12}\text{N}_2+\text{H}]^+$ :  $m/z = 209.1073$ , Found: 209.1067.

#### 6.2.16. Methyl *N*-((4-cyanophenyl)(phenyl)methyl)-glycinate (2q)

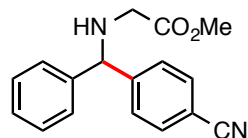

Colorless oil; 271.9 mg, 97% isolated yield; <sup>1</sup>H NMR (500 MHz, CDCl<sub>3</sub>):  $\delta = 7.60$  (d,  $J = 8.6$  Hz, 2H), 7.55 (d,  $J = 8.6$  Hz, 2H), 7.36-7.35 (m, 2H), 7.33-7.30 (m, 2H), 7.27-7.24 (m, 1H), 4.93 (s, 1H), 3.73 (s, 3H), 3.41-3.32 (m, 2H), 2.22 (brs, 1H); <sup>13</sup>C NMR (125 MHz, CDCl<sub>3</sub>):  $\delta = 172.7, 148.6, 141.9, 132.4, 128.8, 128.0, 127.8, 127.3, 118.8, 111.0, 66.1, 51.8, 48.6$ ; IR (neat): 2226, 1736, 1607, 1491, 1435, 1204, 1138, 986, 818, 729, 700  $\text{cm}^{-1}$ ; HRMS (ESI<sup>+</sup>): Calcd. for  $[\text{C}_{17}\text{H}_{16}\text{N}_2\text{O}_2+\text{H}]^+$ :  $m/z = 281.1285$ , Found: 281.1278.

#### 6.2.17. 1-(4-Cyanophenyl)-2-methyl-2,3,4,9-tetrahydro-1*H*-pyrido[3,4-*b*]indole (2r)

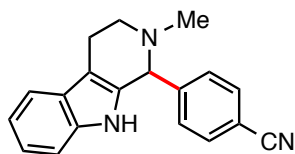

Yellow solid; 247.1 mg, 86% isolated yield; <sup>1</sup>H NMR (500 MHz, CDCl<sub>3</sub>):  $\delta = 7.65$  (d,  $J = 8.6$  Hz, 2H), 7.55-7.53 (m, 1H), 7.50 (d,  $J = 8.6$  Hz, 2H), 7.23 (brs, 1H), 7.21-7.19 (m, 1H), 7.16-7.10 (m, 2H), 4.38 (s, 1H), 3.22 (ddd,  $J = 2.6, 5.4, 11.5$  Hz, 1H), 3.11-3.05 (m, 1H), 2.89-2.84 (m, 1H), 2.80-2.75 (m, 1H), 2.33 (s, 3H); <sup>13</sup>C NMR (125 MHz, CDCl<sub>3</sub>):  $\delta = 146.8, 136.4, 133.2, 132.5, 129.8, 126.8, 122.0, 119.6, 118.6, 118.4, 112.0, 110.9, 109.4, 66.7, 52.7, 43.5, 21.4$ ; IR (neat): 3375, 3032, 2941, 2845, 2806, 2230, 1607, 1454, 1306, 1265, 1061, 920, 833, 737  $\text{cm}^{-1}$ ; HRMS (ESI<sup>+</sup>): Calcd. for  $[\text{C}_{19}\text{H}_{17}\text{N}_3+\text{H}]^+$ :  $m/z = 288.1495$ , Found: 288.1487.

#### 6.2.18. 1-(1*H*-Indol-3-yl)-*N,N*-dimethyl-1-(4-cyanophenyl)methanamine (2s)

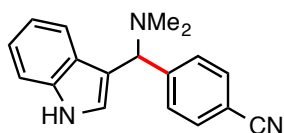

Colorless oil; 212.0 mg, 77% isolated yield; <sup>1</sup>H NMR (500 MHz, CDCl<sub>3</sub>):  $\delta = 8.10$  (brs, 1H), 7.70 (d,  $J = 8.0$  Hz, 1H), 7.65 (d,  $J = 8.3$  Hz, 2H), 7.56 (d,  $J = 8.3$  Hz, 2H), 7.35 (d,  $J = 8.0$  Hz, 1H), 7.20-7.17 (m, 1H), 7.13-7.09 (m, 2H), 4.59 (s, 1H), 2.26 (s, 6H); <sup>13</sup>C NMR (125 MHz, CDCl<sub>3</sub>):  $\delta = 149.1, 136.3, 132.2, 128.5, 126.3, 122.7, 122.3, 119.8, 119.8, 119.1, 116.7, 111.2, 110.3, 69.0, 44.3$  ppm; IR (neat): 2860, 2818, 2226, 1605, 1454, 1338, 1011, 736  $\text{cm}^{-1}$ ; HRMS (ESI<sup>+</sup>): Calcd. for  $[\text{C}_{18}\text{H}_{17}\text{N}_2+\text{H}]^+$ :  $m/z = 276.1495$ , Found: 276.1491.

### 6.2.19. 1-(4-Cyanophenyl)-*N*-methyl-1-(pyridin-3-yl)methanamine (2t)

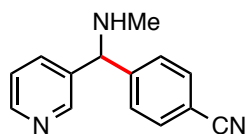

Yellow solid; 207.7 mg, 93% isolated yield;  $^1\text{H}$  NMR (500 MHz,  $\text{CDCl}_3$ ):  $\delta$  = 8.62 (d,  $J$  = 1.7 Hz, 1H), 8.50 (dd,  $J$  = 1.7, 5.2 Hz, 1H), 7.65-7.64 (m, 1H), 7.62 (d,  $J$  = 8.3, 2H), 7.54 (d,  $J$  = 8.3 Hz, 2H), 7.24 (dd,  $J$  = 5.2, 7.7 Hz, 1H), 4.78 (s, 1H), 2.41 (s, 3H);  $^{13}\text{C}$  NMR (125 MHz,  $\text{CDCl}_3$ ):  $\delta$  = 149.1, 148.9, 148.2, 138.1, 134.6, 132.5, 127.8, 123.7, 118.6, 111.2, 66.9, 34.9; IR (neat): 3291, 2945, 2793, 2228, 1605, 1501, 1425, 1304, 1132, 881, 813, 714  $\text{cm}^{-1}$ ; HRMS (ESI $^+$ ): Calcd. for  $[\text{C}_{14}\text{H}_{13}\text{N}_3+\text{H}]^+$ :  $m/z$  = 244.1182, Found: 244.1179.

### 6.2.20. *N,N*-Dimethyl-1-phenyl-1-(pyridin-4-yl)methanamine (2u)

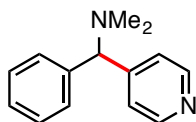

Colorless solid; 197.4 mg, 93% isolated yield;  $^1\text{H}$  NMR (500 MHz,  $\text{CDCl}_3$ ):  $\delta$  = 8.50-8.49 (m, 2H), 7.38-7.36 (m, 4H), 7.29 (dd,  $J$  = 7.5, 7.5 Hz, 2H), 7.24-7.20 (m, 1H), 4.07 (s, 1H), 2.19 (s, 6H);  $^{13}\text{C}$  NMR (125 MHz,  $\text{CDCl}_3$ ):  $\delta$  = 152.3, 150.0, 141.5, 128.7, 127.8, 127.5, 122.8, 76.8, 44.4; IR (neat): 2943, 2866, 2822, 2778, 1591, 1452, 1412, 1308, 1151, 1022, 887, 802, 741, 700  $\text{cm}^{-1}$ ; HRMS (ESI $^+$ ): Calcd. for  $[\text{C}_{14}\text{H}_{16}\text{N}_2+\text{H}]^+$ :  $m/z$  = 213.1386, Found: 213.1379.

### 6.2.21. 1-(2-Fluoropyridin-4-yl)-*N,N*-dimethyl-1-phenyl-methanamine (2v)

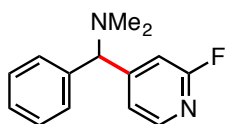

Colorless solid; 142.8 mg, 62% isolated yield;  $^1\text{H}$  NMR (500 MHz,  $\text{CDCl}_3$ ):  $\delta$  = 8.10 (d,  $J$  = 5.2 Hz, 1H), 7.36-7.29 (m, 4H), 7.26-7.23 (m, 2H), 7.04 (brs, 1H), 4.12 (s, 1H), 2.19 (s, 6H);  $^{13}\text{C}$  NMR (125 MHz,  $\text{CDCl}_3$ ):  $\delta$  = 164.1 (d,  $J$  = 238.7 Hz), 158.6 (d,  $J$  = 8.4 Hz), 147.6 (d,  $J$  = 15.6 Hz), 140.7, 128.8, 127.9, 127.8, 120.5 (d,  $J$  = 3.6 Hz), 108.2 (d,  $J$  = 37.2 Hz), 76.4 (d,  $J$  = 2.4 Hz), 44.3; IR (neat): 2992, 2963, 2818, 2770, 1611, 1566, 1480, 1285, 1267, 1145, 1022, 949, 758, 706  $\text{cm}^{-1}$ ; HRMS (ESI $^+$ ): Calcd. for  $[\text{C}_{14}\text{H}_{15}\text{FN}_2+\text{H}]^+$ :  $m/z$  = 231.1292, Found: 231.1290.

### 6.2.22. 1-(2-Chloropyridin-4-yl)-*N,N*-dimethyl-1-phenyl-methanamine (2w)

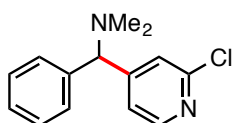

Colorless oil; 207.3 mg, 84% isolated yield;  $^1\text{H}$  NMR (500 MHz,  $\text{CDCl}_3$ ):  $\delta$  = 8.27 (d,  $J$  = 5.2 Hz, 1H), 7.43 (brs, 1H), 7.35-7.29 (m, 5H), 7.26-7.23 (m, 1H), 4.07 (s, 1H), 2.19 (s, 6H);  $^{13}\text{C}$  NMR (125 MHz,  $\text{CDCl}_3$ ):  $\delta$  = 156.0, 151.7, 149.7, 140.6, 128.8, 127.9, 127.8, 123.1, 121.5, 76.3, 44.3; IR (neat): 2988, 2953, 2820, 2776, 1585, 1545, 1454, 1379, 1078, 1022, 926, 819, 721, 700  $\text{cm}^{-1}$ ; HRMS (ESI $^+$ ): Calcd. for  $[\text{C}_{14}\text{H}_{15}\text{ClN}_2+\text{H}]^+$ :  $m/z$  = 247.0997, Found: 247.0990.

### 6.2.23. 1-(3-Chloropyridin-4-yl)-*N,N*-dimethyl-1-phenyl-methanamine (2x)

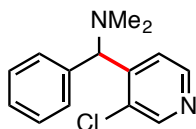

Yellow oil; 239.3 mg, 97% isolated yield;  $^1\text{H}$  NMR (500 MHz,  $\text{CDCl}_3$ ):  $\delta$  = 8.47 (s, 1H), 8.46 (d,  $J$  = 5.2 Hz, 1H), 7.78 (d,  $J$  = 5.2 Hz, 1H), 7.43 (d,  $J$  = 7.5 Hz, 2H), 7.30-7.21 (m, 3H), 4.57 (s, 1H), 2.19 (s, 6H);  $^{13}\text{C}$  NMR (125 MHz,  $\text{CDCl}_3$ ):  $\delta$  = 149.8, 149.5, 148.0, 140.1, 131.4, 128.6, 128.4, 127.7, 123.0, 71.7, 44.5; IR (neat): 2994, 2957, 2820, 2776, 2494, 2158, 2031, 1977, 1578, 1468, 1395, 1090, 1018, 885, 823, 700  $\text{cm}^{-1}$ ; HRMS (ESI $^+$ ): Calcd. for  $[\text{C}_{14}\text{H}_{15}\text{ClN}_2+\text{H}]^+$ :  $m/z$  = 247.0997, Found: 247.0993.

### 6.2.24. 1-(Isoquinolin-1-yl)-*N,N*-dimethyl-1-phenylmethanamine (2y)

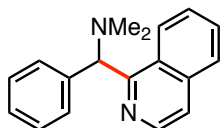

Colorless solid; 151.2 mg, 58% isolated yield;  $^1\text{H}$  NMR (500 MHz,  $\text{CDCl}_3$ ):  $\delta$  = 8.65 (d,  $J$  = 8.6 Hz, 1H), 8.60 (d,  $J$  = 5.7 Hz, 1H), 7.75 (d,  $J$  = 8.0 Hz, 1H), 7.65 (d,  $J$  = 6.9 Hz, 2H), 7.61-7.34 (m, 2H), 7.49 (d,  $J$  = 5.7 Hz, 1H), 7.26-7.23 (m, 2H), 7.17-7.12 (m, 1H), 5.08 (s, 1H), 2.29 (s, 6H);  $^{13}\text{C}$  NMR (125 MHz,  $\text{CDCl}_3$ ):  $\delta$  = 160.3, 142.2, 140.7, 136.6, 129.5, 128.8, 128.2, 127.5, 127.2, 126.9, 126.7, 124.8, 119.7, 75.2, 44.8; IR (neat): 3039, 3010, 2851, 1651, 1512, 1485, 1248, 1033, 812, 689  $\text{cm}^{-1}$ ; HRMS (ESI $^+$ ): Calcd. for  $[\text{C}_{18}\text{H}_{18}\text{N}_2+\text{H}]^+$ :  $m/z$  = 263.1543, Found: 263.1541.

### 6.2.25. Methyl 4-((dimethylamino)(phenyl)methyl)benzoate (2z)

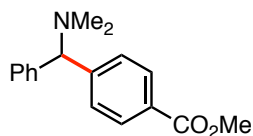

Colorless solid; 85.8 mg, 32% isolated yield;  $^1\text{H}$  NMR (500 MHz,  $\text{CDCl}_3$ ):  $\delta$  = 7.95 (d,  $J$  = 8.3 Hz, 2H), 7.52 (d,  $J$  = 8.3 Hz, 2H), 7.40 (d,  $J$  = 7.5 Hz, 2H), 7.29-7.26 (m, 2H), 7.19 (t,  $J$  = 7.5 Hz, 1H), 4.12 (s, 1H), 3.87 (s, 3H), 2.19 (s, 6H);  $^{13}\text{C}$  NMR (125 MHz,  $\text{CDCl}_3$ ):  $\delta$  = 160.9, 148.8, 142.5, 129.9, 128.8, 128.6, 127.8, 127.6, 127.2, 77.7, 52.0, 44.6; IR (neat): 3035, 2961,

2791, 1719, 1643, 1552, 1433, 1279, 1018, 802, 667  $\text{cm}^{-1}$ ; HRMS (ESI<sup>+</sup>): Calcd. for  $[\text{C}_{17}\text{H}_{19}\text{NO}_2+\text{H}]^+$ :  $m/z = 270.1489$ , Found: 254.1489.

#### 6.2.26. 1-((4-Cyanophenyl)(phenyl)methyl)-indoline (2aa)

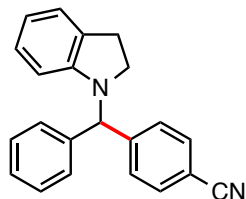

Colorless oil; 217.3 mg, 70% isolated yield; <sup>1</sup>H NMR (500 MHz, CDCl<sub>3</sub>):  $\delta = 7.62$  (d,  $J = 8.3$  Hz, 2H), 7.50 (d,  $J = 8.3$  Hz, 2H), 7.35-7.26 (m, 5H), 7.10 (d,  $J = 7.5$  Hz, 1H), 6.95-6.92 (m, 1H), 6.69-6.66 (m, 1H), 6.12 (d,  $J = 8.0$  Hz, 1H), 5.53 (s, 1H), 3.23-3.18 (m, 1H), 3.13-3.08 (m, 1H), 3.01-2.90 (m, 2H); <sup>13</sup>C NMR (125 MHz, CDCl<sub>3</sub>):  $\delta = 151.4, 147.2, 139.6, 132.4, 130.4, 128.8, 128.7, 128.7, 127.8, 127.1, 124.5, 118.8, 118.2, 111.0, 108.2, 66.7, 51.6, 28.3$ ; IR (neat): 2843, 2226, 1603, 1483, 1242, 1026, 810, 745, 700  $\text{cm}^{-1}$ ; HRMS (ESI<sup>+</sup>): Calcd. for  $[\text{C}_{23}\text{H}_{20}\text{N}_2+\text{H}]^+$ :  $m/z = 311.1543$ , Found: 311.1544.

#### 6.2.27. 1-Benzyl-2-(4-cyanophenyl)-1,2,3,4-tetrahydroquinoline (2ab)

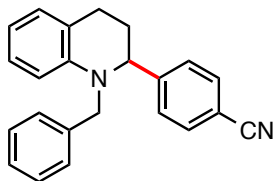

Colorless solid; 295.2 mg, 91% isolated yield; <sup>1</sup>H NMR (500 MHz, CDCl<sub>3</sub>):  $\delta = 7.60$  (d,  $J = 8.0$  Hz, 2H), 7.32-7.30 (m, 4H), 7.26-7.23 (m, 1H), 7.20 (d,  $J = 6.9$  Hz, 2H), 7.07-7.04 (m, 1H), 7.02 (d,  $J = 6.9$  Hz, 1H), 6.68-6.65 (m, 1H), 6.61 (d,  $J = 8.0$  Hz, 1H), 4.77-4.72 (m, 2H), 4.15 (d,  $J = 17.2$  Hz, 1H), 2.65 (ddd,  $J = 3.4, 4.0, 15.5$  Hz, 1H), 2.56-2.50 (m, 1H), 2.37-2.30 (m, 1H), 2.10-2.05 (m, 1H); <sup>13</sup>C NMR (125 MHz, CDCl<sub>3</sub>):  $\delta = 149.6, 144.4, 137.8, 132.2, 128.9, 128.6, 127.5, 127.4, 126.8, 126.2, 121.6, 118.7, 116.2, 110.7, 110.5, 60.9, 52.8, 28.9, 23.2$ ; IR (neat): 3026, 2936, 2228, 1601, 1493, 1449, 1342, 1252, 1173, 970, 844, 745  $\text{cm}^{-1}$ ; HRMS (ESI<sup>+</sup>): Calcd. for  $[\text{C}_{23}\text{H}_{20}\text{N}_2+\text{H}]^+$ :  $m/z = 325.1699$ , Found: 325.1695.

#### 6.2.28. 1-((4-Cyanophenyl)(phenyl)methyl)-2,3,4,5-tetrahydro-1H-benzo[b]azepine (2ac)

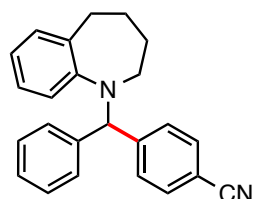

Colorless amorphous; 142.1 mg, 42% isolated yield; <sup>1</sup>H NMR (500 MHz, CDCl<sub>3</sub>):  $\delta = 7.50$  (d,  $J = 8.3$  Hz, 2H), 7.47 (d,  $J = 8.3$  Hz, 2H), 7.39 (d,  $J = 7.5$  Hz, 2H), 7.29-7.26 (m, 2H),

7.22-7.19 (m, 1H), 7.12 (d,  $J = 6.3$  Hz, 1H), 6.92-6.89 (m, 1H), 6.83-6.80 (m, 1H), 6.70 (d,  $J = 8.0$  Hz, 1H), 5.69 (s, 1H), 3.07-3.00 (m, 2H), 2.93-2.83 (m, 2H), 1.73-1.69 (m, 1H), 1.59-1.42 (m, 3H);  $^{13}\text{C}$  NMR (125 MHz,  $\text{CDCl}_3$ ):  $\delta = 150.5, 149.3, 142.2, 136.9, 132.3, 129.8, 128.7, 128.4, 128.0, 127.4, 126.2, 121.9, 120.2, 118.8, 110.4, 71.0, 52.1, 34.7, 29.7, 25.6$ ; IR (neat): 2228, 1595, 1491, 1451, 1236, 1132, 810, 750, 698  $\text{cm}^{-1}$ ; HRMS (ESI $^+$ ): Calcd. for  $[\text{C}_{24}\text{H}_{22}\text{N}_2+\text{H}]^+$ :  $m/z = 339.1856$ , Found: 339.1852.

### 6.2.29. 1-Benzyl-2-(4-cyanophenyl)-2,3,4,5-tetrahydro-1H-benzo[b]azepine (2ac')

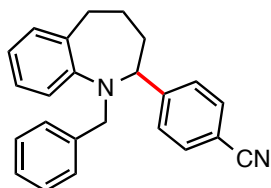

Colorless amorphous; 125.2 mg, 37% isolated yield;  $^1\text{H}$  NMR (500 MHz,  $\text{CDCl}_3$ ):  $\delta = 7.61$  (d,  $J = 8.3$  Hz, 2H), 7.32 (d,  $J = 8.3$  Hz, 2H), 7.28-7.25 (m, 2H), 7.22-7.12 (m, 5H), 6.98-6.93 (m, 2H), 4.28 (d,  $J = 14.9$  Hz, 1H), 4.22 (dd,  $J = 2.9, 8.0$  Hz, 1H), 3.99 (d,  $J = 14.9$  Hz, 1H), 3.05-3.00 (m, 1H), 2.89-2.84 (m, 1H), 1.77-1.59 (m, 4H);  $^{13}\text{C}$  NMR (125 MHz,  $\text{CDCl}_3$ ):  $\delta = 150.0, 147.1, 138.3, 135.2, 132.1, 128.8, 128.2, 128.0, 127.9, 127.0, 126.8, 122.4, 121.0, 118.9, 110.5, 63.4, 55.6, 32.2, 30.7, 21.1$ ; IR (neat): 2226, 1597, 1487, 1450, 1230, 1138, 937, 827, 754, 696  $\text{cm}^{-1}$ ; HRMS (ESI $^+$ ): Calcd. for  $[\text{C}_{24}\text{H}_{22}\text{N}_2+\text{H}]^+$ :  $m/z = 339.1856$ , Found: 339.1849.

### 6.2.30. 1-(4-Cyanophenyl)-N,N-dimethyl-1-(4-(hydroxymethyl)-phenyl)methanamine (2ad)

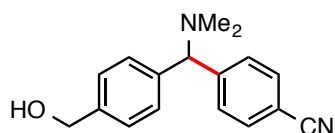

Colorless oil; 234.4 mg, 88% isolated yield;  $^1\text{H}$  NMR (500 MHz,  $\text{CDCl}_3$ ):  $\delta = 7.57$  (d,  $J = 8.6$  Hz, 2H), 7.55 (d,  $J = 8.6$  Hz, 2H), 7.36 (d,  $J = 8.0$  Hz, 2H), 7.30 (d,  $J = 8.0$  Hz, 2H), 4.64 (d,  $J = 5.4$  Hz, 2H), 4.13 (s, 1H), 2.18 (s, 6H), 1.62 (t,  $J = 5.4$  Hz, 1H);  $^{13}\text{C}$  NMR (125 MHz,  $\text{CDCl}_3$ ):  $\delta = 149.0, 141.3, 140.2, 132.4, 128.3, 127.9, 127.4, 118.8, 110.7, 77.2, 64.9, 44.5$ ; IR (neat): 2990, 2953, 2864, 2822, 2778, 2228, 1605, 1501, 1458, 1416, 1015, 891, 816, 787, 731  $\text{cm}^{-1}$ ; HRMS (ESI $^+$ ): Calcd. for  $[\text{C}_{17}\text{H}_{18}\text{N}_2\text{O}+\text{H}]^+$ :  $m/z = 267.1492$ , Found: 267.1485.

### 6.2.31. N-((4-Cyanophenyl)(phenyl)methyl)-4-((dimethylamino)methyl)aniline (2ae)

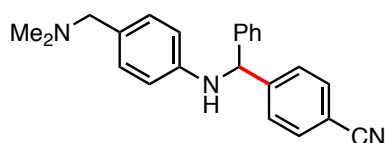

Colorless oil; 242.4 mg, 71% isolated yield;  $^1\text{H}$  NMR (500 MHz,  $\text{CDCl}_3$ ):  $\delta$  = 7.62 (d,  $J$  = 8.0 Hz, 2H), 7.52 (d,  $J$  = 8.0 Hz, 2H), 7.36-7.26 (m, 5H), 7.08 (d,  $J$  = 8.3 Hz, 2H), 6.47 (d,  $J$  = 8.3 Hz, 2H), 5.51 (d,  $J$  = 3.4 Hz, 1H), 4.23 (d,  $J$  = 3.4 Hz, 1H), 3.37 (s, 2H), 2.25 (s, 6H);  $^{13}\text{C}$  NMR (125 MHz,  $\text{CDCl}_3$ ):  $\delta$  = 148.0, 146.0, 141.6, 132.5, 130.3, 129.0, 128.0, 127.8, 127.5, 126.9, 118.7, 113.3, 111.0, 63.3, 62.8, 44.6; IR (neat): 2502, 2158, 2031, 1977, 1612, 1516, 1267, 1018, 851, 698  $\text{cm}^{-1}$ ; HRMS ( $\text{ESI}^+$ ): Calcd. for  $[\text{C}_{17}\text{H}_{18}\text{N}_2\text{O}+\text{H}]^+$ :  $m/z$  = 342.1965, Found: 342.1969.

### 6.2.32. *N*-((4-Cyanophenyl)(phenyl)methyl)-*N*,3-dimethyl-but-2-en-1-amine(2af)

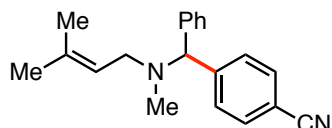

Colorless oil; 78.4 mg, 27% isolated yield;  $^1\text{H}$  NMR (500 MHz,  $\text{CDCl}_3$ ):  $\delta$  = 7.56 (s, 4H), 7.35 (d,  $J$  = 7.5 Hz, 2H), 7.30-7.27 (m, 2H), 7.22-7.19 (m, 1H), 5.28 (t,  $J$  = 6.6 Hz, 1H), 4.40 (s, 1H), 2.97-2.88 (m, 2H), 2.10 (s, 3H), 1.73 (s, 3H), 1.50 (s, 3H);  $^{13}\text{C}$  NMR (125 MHz,  $\text{CDCl}_3$ ):  $\delta$  = 149.1, 141.6, 135.2, 132.3, 128.6, 128.5, 128.0, 127.4, 121.1, 118.9, 110.5, 75.0, 52.9, 40.2, 25.9, 17.9; IR (neat): 2228, 1607, 1490, 1452, 1126, 1013, 814, 754, 729, 698  $\text{cm}^{-1}$ ; HRMS ( $\text{ESI}^+$ ): Calcd. for  $[\text{C}_{17}\text{H}_{18}\text{N}_2\text{O}+\text{H}]^+$ :  $m/z$  = 291.856, Found: 291.854.

### 6.2.33. 2-((1-((4-Cyanophenyl)(phenyl)methyl)piperidin-4-yl)methyl)-5,6-dimethoxy-2,3-dihydro-1*H*-inden-1-one (2ag)

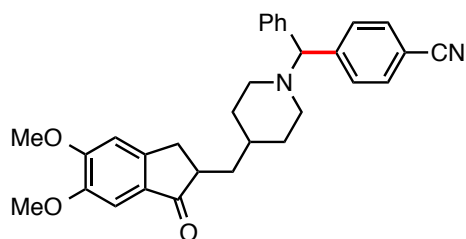

Colorless oil; 355.7mg, 74% isolated yield;  $^1\text{H}$  NMR (500 MHz,  $\text{CDCl}_3$ ):  $\delta$  = 7.57 (d,  $J$  = 8.3 Hz, 2H), 7.55 (d,  $J$  = 8.3 Hz, 2H), 7.33 (d,  $J$  = 7.5 Hz, 2H), 7.30-7.27 (m, 2H), 7.23-7.20 (m, 1H), 7.16 (s, 1H), 6.84 (s, 1H), 4.31 (s, 1H), 3.96 (s, 3H), 3.90 (s, 3H), 3.22 (dd,  $J$  = 8.0, 17.2 Hz, 1H), 2.86-2.81 (m, 2H), 2.71-2.70 (m, 2H), 1.95-1.82 (m, 3H), 1.73-1.70 (m, 1H), 1.64-1.50 (m, 2H), 1.42-1.32 (m, 3H);  $^{13}\text{C}$  NMR (125 MHz,  $\text{CDCl}_3$ ):  $\delta$  = 207.6, 155.3, 149.3, 148.9, 148.6, 141.3, 132.2, 129.1, 128.5, 128.4, 127.8, 127.2, 118.8, 110.3, 107.2, 104.2, 75.8, 56.1, 55.9, 52.6, 52.5, 51.8, 45.3, 38.5, 34.3, 33.1, 31.8; IR (neat): 2914, 2839, 2224, 1690, 1591, 1499, 1312, 1263, 1121, 1034, 912, 727  $\text{cm}^{-1}$ ; HRMS ( $\text{ESI}^+$ ): Calcd. for  $[\text{C}_{17}\text{H}_{18}\text{N}_2\text{O}+\text{H}]^+$ :  $m/z$  = 481.2486, Found: 481.2481.

**6.2.34. Methyl (R)-2-(2-chlorophenyl)-2-(4-(4-cyanophenyl)-6,7-dihydrothieno[3,2-c]pyridin-5(4H)-yl)acetate (2af)**

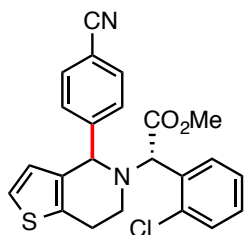

**2ah**: Colorless amorphous; 194.6 mg, 46% isolated yield;  $^1\text{H}$  NMR (500 MHz,  $\text{CDCl}_3$ ):  $\delta$  = 7.71 (dd,  $J$  = 2.3, 7.5 Hz, 1H), 7.59 (d,  $J$  = 8.6 Hz, 2H), 7.56 (d,  $J$  = 8.6 Hz, 2H), 7.39 (dd,  $J$  = 1.7, 7.5 Hz, 1H), 7.31-7.25 (m, 2H), 7.15 (d,  $J$  = 5.2 Hz, 1H), 6.65 (d,  $J$  = 5.2 Hz, 1H), 5.11 (s, 1H), 5.07 (s, 1H), 3.64 (s, 3H), 2.92-2.82 (m, 2H), 2.66-2.58 (m, 2H);  $^{13}\text{C}$  NMR (125 MHz,  $\text{CDCl}_3$ ):  $\delta$  = 172.4, 148.4, 135.0, 134.5, 133.5, 132.3, 131.8, 130.3, 129.9, 129.6, 129.5, 127.2, 126.8, 122.9, 119.0, 110.9, 63.4, 61.1, 52.2, 41.1, 22.2; IR (neat): 2230, 1736, 1605, 1436, 1192, 1165, 1030, 847, 756  $\text{cm}^{-1}$ ; HRMS ( $\text{ESI}^+$ ): Calcd. for  $[\text{C}_{17}\text{H}_{18}\text{N}_2\text{O}+\text{H}]^+$ :  $m/z$  = 267.1492, Found: 267.1485.

**2ah'**: Colorless amorphous; 211.46 mg, 50% isolated yield;  $^1\text{H}$  NMR (500 MHz,  $\text{CDCl}_3$ ):  $\delta$  = 7.60 (d,  $J$  = 7.5 Hz, 1H), 7.57 (d,  $J$  = 8.0 Hz, 2H), 7.44 (d,  $J$  = 8.0 Hz, 2H), 7.33-7.30 (m, 2H), 7.27-7.24 (m, 1H), 7.00 (d,  $J$  = 5.2 Hz, 1H), 6.28 (d,  $J$  = 5.2 Hz, 1H), 5.10 (s, 1H), 4.66 (s, 1H), 3.76 (s, 3H), 3.26-3.23 (m, 1H), 3.08-3.00 (m, 2H), 2.91-2.86 (m, 1H);  $^{13}\text{C}$  NMR (125 MHz,  $\text{CDCl}_3$ ):  $\delta$  = 170.6, 147.8, 135.7, 134.4, 134.2, 134.0, 132.2, 129.9, 129.7, 129.2, 129.2, 126.8, 126.1, 123.0, 118.8, 111.5, 63.8, 63.7, 51.9, 44.3, 25.0; IR (neat): 2839, 2228, 1734, 1607, 1433, 1202, 1161, 999, 827, 752  $\text{cm}^{-1}$ ; HRMS ( $\text{ESI}^+$ ): Calcd. for  $[\text{C}_{17}\text{H}_{18}\text{N}_2\text{O}+\text{H}]^+$ :  $m/z$  = 267.1492, Found: 267.1489.

**6.2.35. 4-(1-Benzylpyrrolidin-2-yl)benzonitrile (3j) (equation 1, 0.2 mmol scale)**

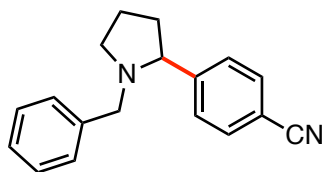

Colorless oil; 23.8 mg, 45% isolated yield;  $^1\text{H}$  NMR (500 MHz,  $\text{CDCl}_3$ ):  $\delta$  = 7.63 (d,  $J$  = 8.6 Hz, 2H), 7.57 (d,  $J$  = 8.6 Hz, 2H), 7.30-7.21 (m, 5H), 3.76 (d,  $J$  = 13.2 Hz, 1H), 3.47 (t,  $J$  = 8.3 Hz, 1H), 3.14-3.10 (m, 2H), 2.29-2.19 (m, 2H), 1.94-1.76 (m, 2H), 1.70-1.62 (m, 1H);  $^{13}\text{C}$  NMR (125 MHz,  $\text{CDCl}_3$ ):  $\delta$  = 150.2, 139.1, 132.3, 128.5, 128.2, 128.1, 126.9, 119.1, 110.6, 69.0, 58.2, 53.4, 35.3, 22.6; IR ( $\text{CHCl}_3$ ): 3049, 2800, 2233, 1606, 1493, 835, 694  $\text{cm}^{-1}$ ; HRMS ( $\text{ESI}^+$ ): Calcd. for  $[\text{C}_{18}\text{H}_{18}\text{N}_2+\text{H}]^+$ :  $m/z$  = 263.1543, Found: 263.1547.



## 7. Limitation regarding electron-deficient aromatic compounds

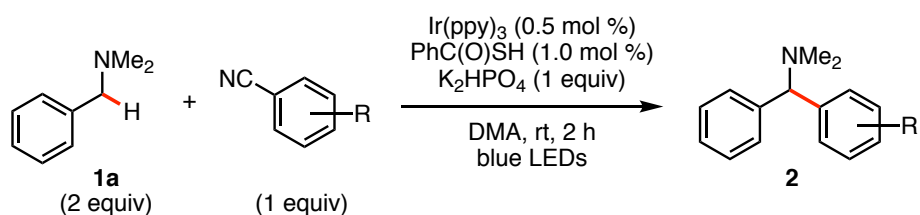

Arylating reagents:

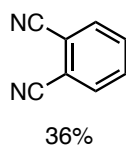

Less than 20% of the products were detected when the following aryl cyanides were used.

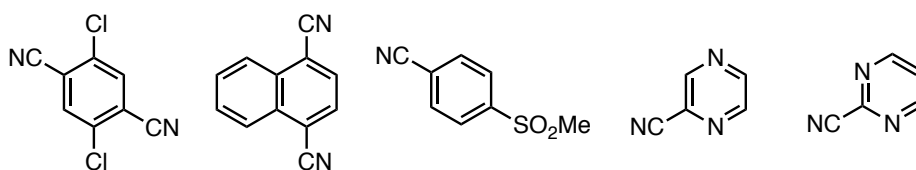

No reaction was observed when the following aryl cyanides were used.

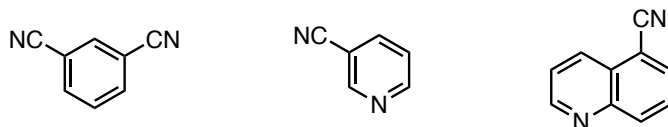

## 8. References

- 1) R. Feng, J. Yao, Z. Liang, Z. Liu and Y. Zhang, *J. Org. Chem.*, 2013, **78**, 3688-3696.
- 2) Z. Li, C. Gelbaum, J. S. Fisk, B. Holden, A. Jaganathan, G. T. Whiteker, P. Pollet and C. L. Liotta, *J. Org. Chem.*, 2016, **81**, 8520-8529.
- 3) E. Sperotto, G. P. M. Klink, J. G. Vries and G. Koten, *Tetrahedron*, 2010, **66**, 3478-3484.
- 4) N. G. Connelly and W. E. Geiger, *Chem. Rev.*, 1996, **96**, 877-910.
- 5) C. K. Prier, D. A. Rankic and D. W. C. MacMillan, *Chem. Rev.*, 2013, **113**, 5322-5363.
- 6) K. Hoshino, T. Ogawa, S. Yasuike, H. Seki, J. Kurita, T. Tokunaga, K. Yamaguchi, *J. Phys. Chem. B*, 2004, **108**, 18698-18704.
- 7) R. Ballardini, G. Varani, M. T. Indelli, F. Scandola and V. Balzani, *J. Am. Chem. Soc.*, 1978, **100**, 7219-7223.
- 8) J. Athilakshmi and D. K. Chand, *Tetrahedron Lett.*, 2010, **51**, 6760-6762.
- 9) K. D. Welch, D. P. Harrison, M. Sabat, E. Z. Hejazi, B. T. Parr, M. G. Fanelli, N. A. Gianfrancesco, D. S. Nagra, W. H. Myers and W. D. Harman, *Organometallics*, 2009, **28**, 5960-5967.
- 10) J. Robert, M. Anouti and J. Paris, *J. Chem. Soc. Perkin Trans. 2*, 1997, 473-478; Also see: R. Zhao, J. Lind, G. Merényi and T. E. Eriksen, *J. Am. Chem. Soc.*, 1998, **120**, 2811-2816.

## 9. NMR spectra

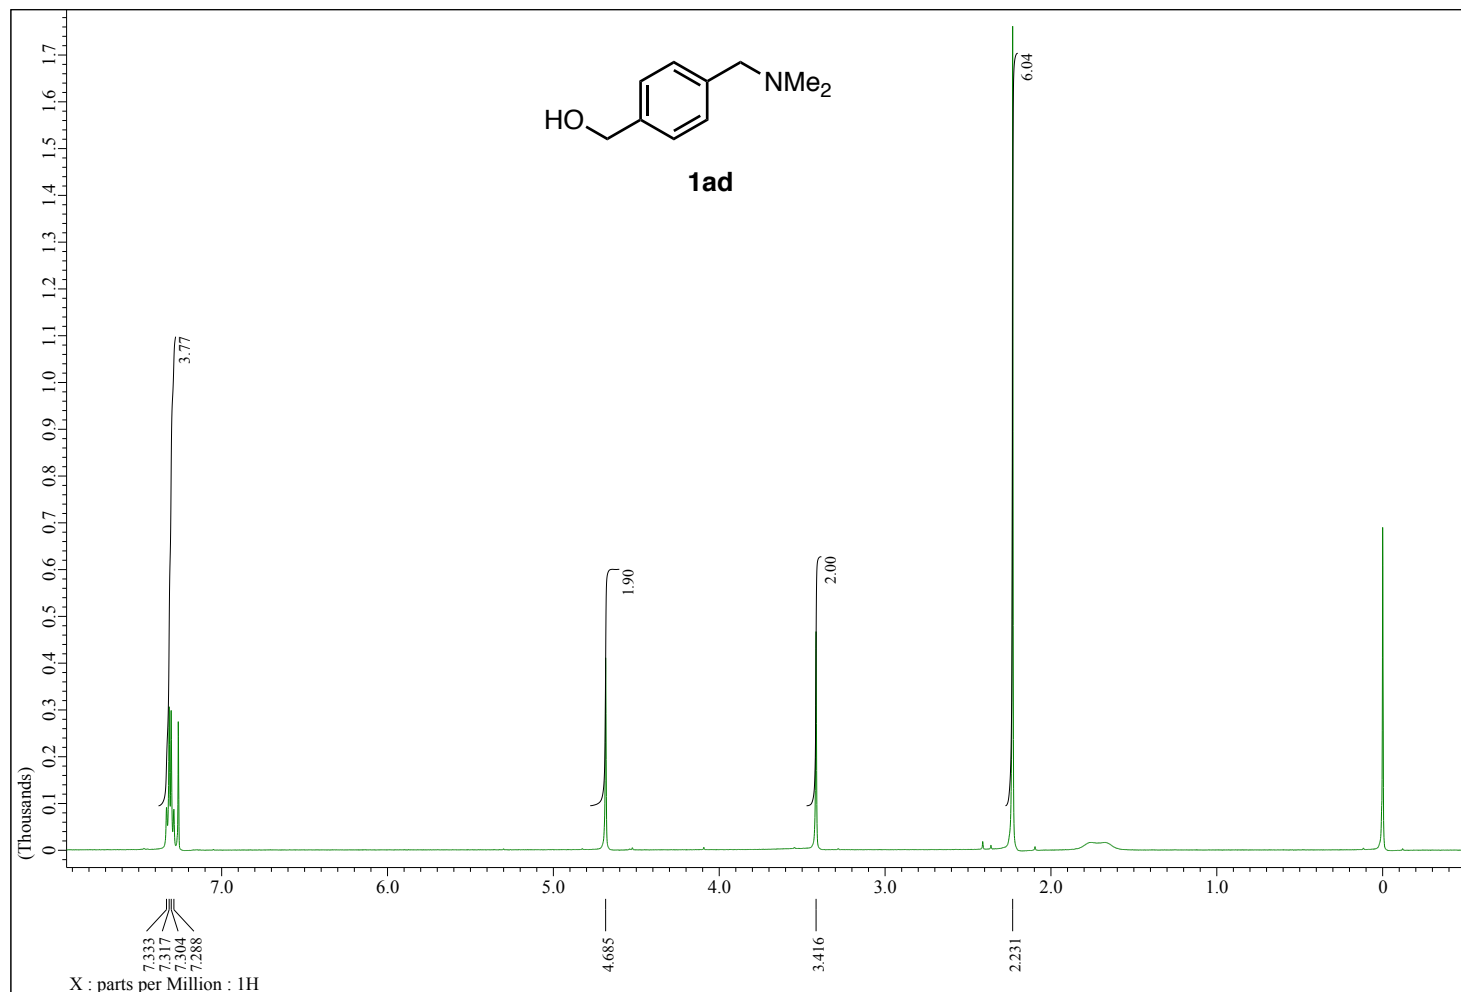

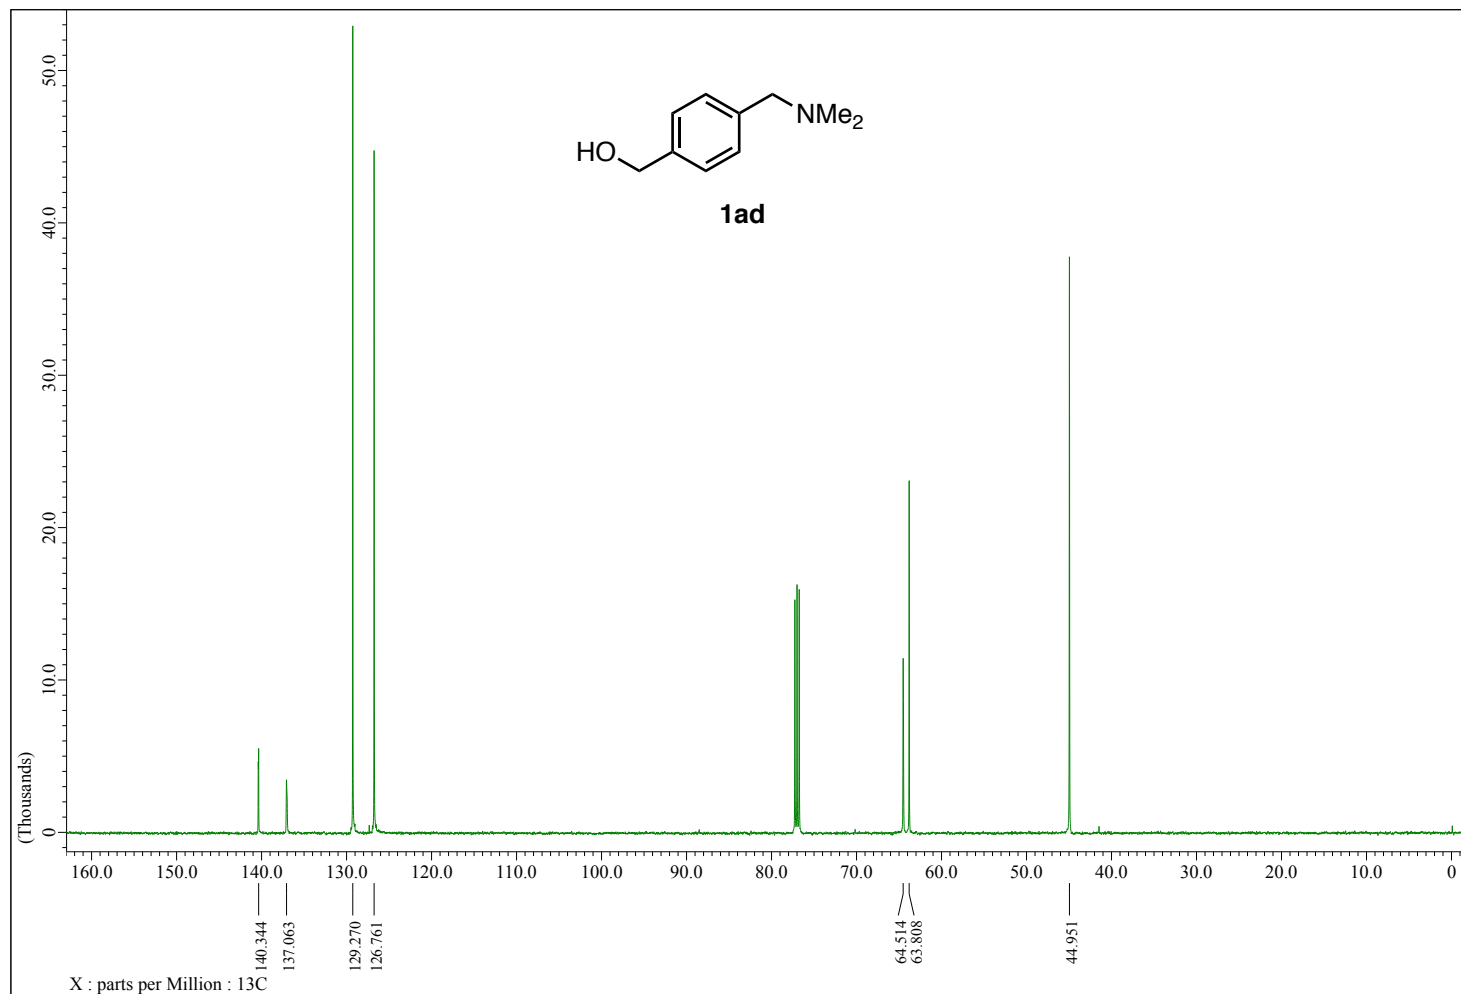

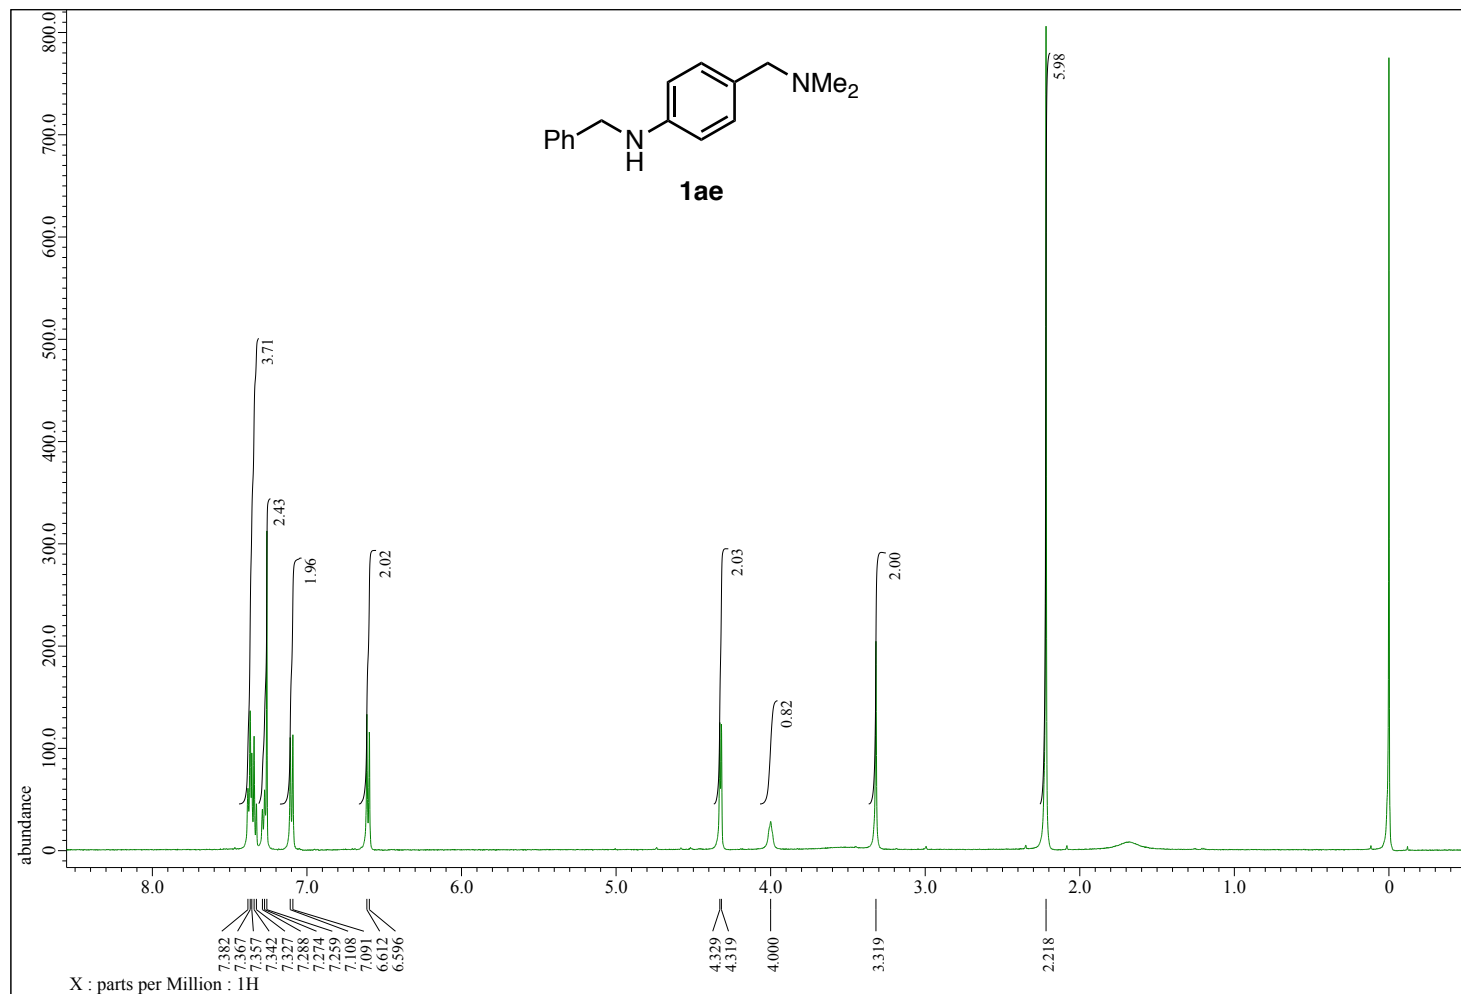

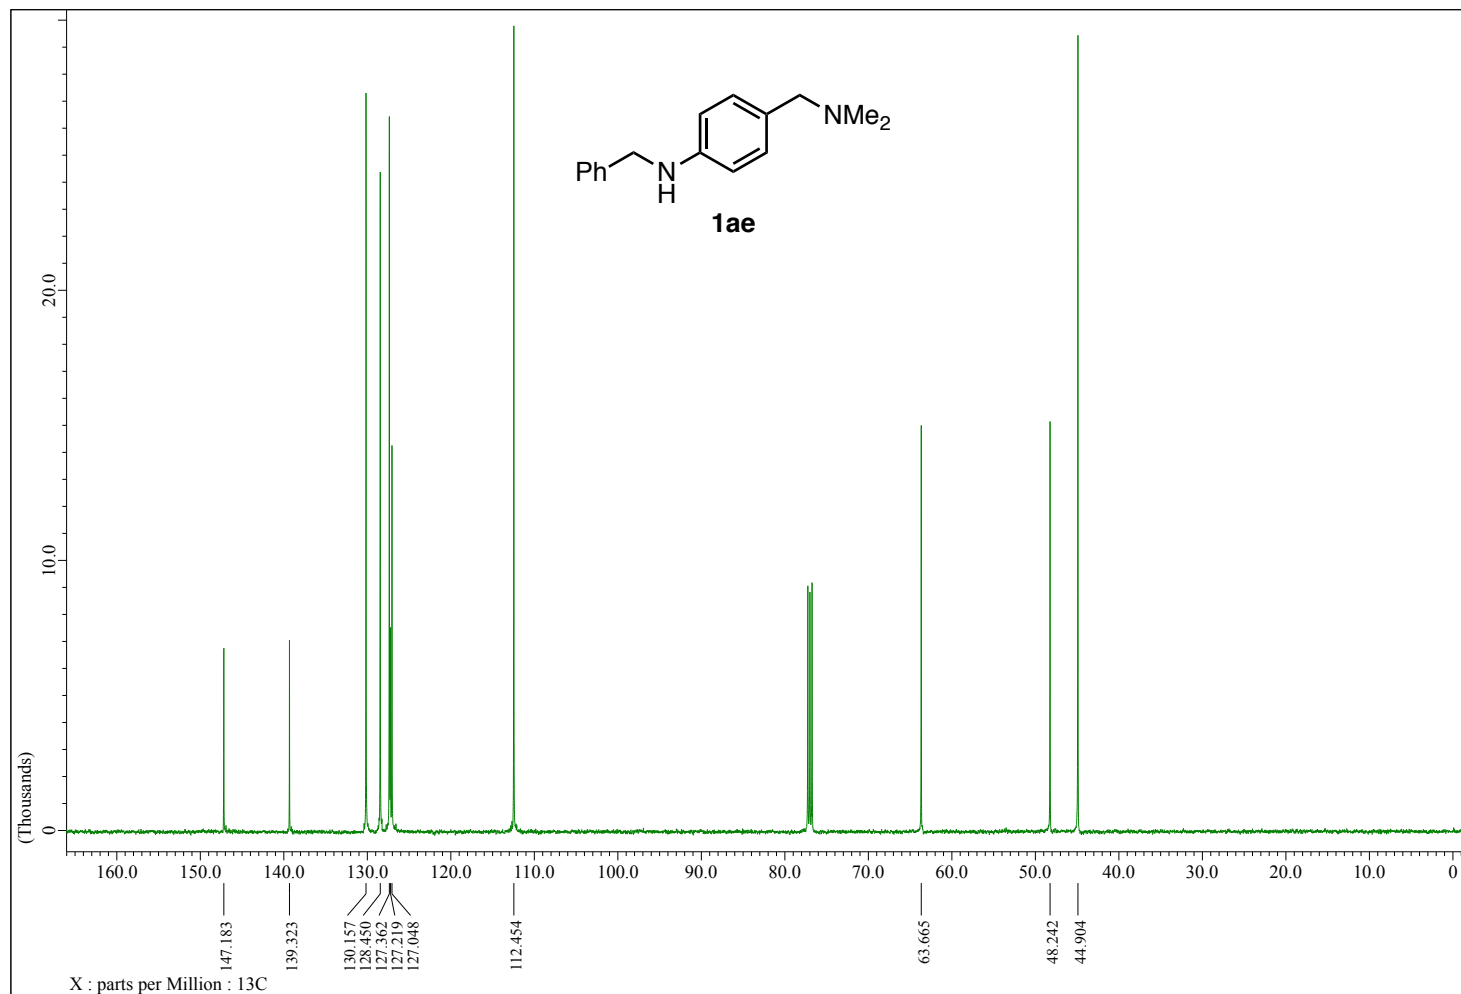

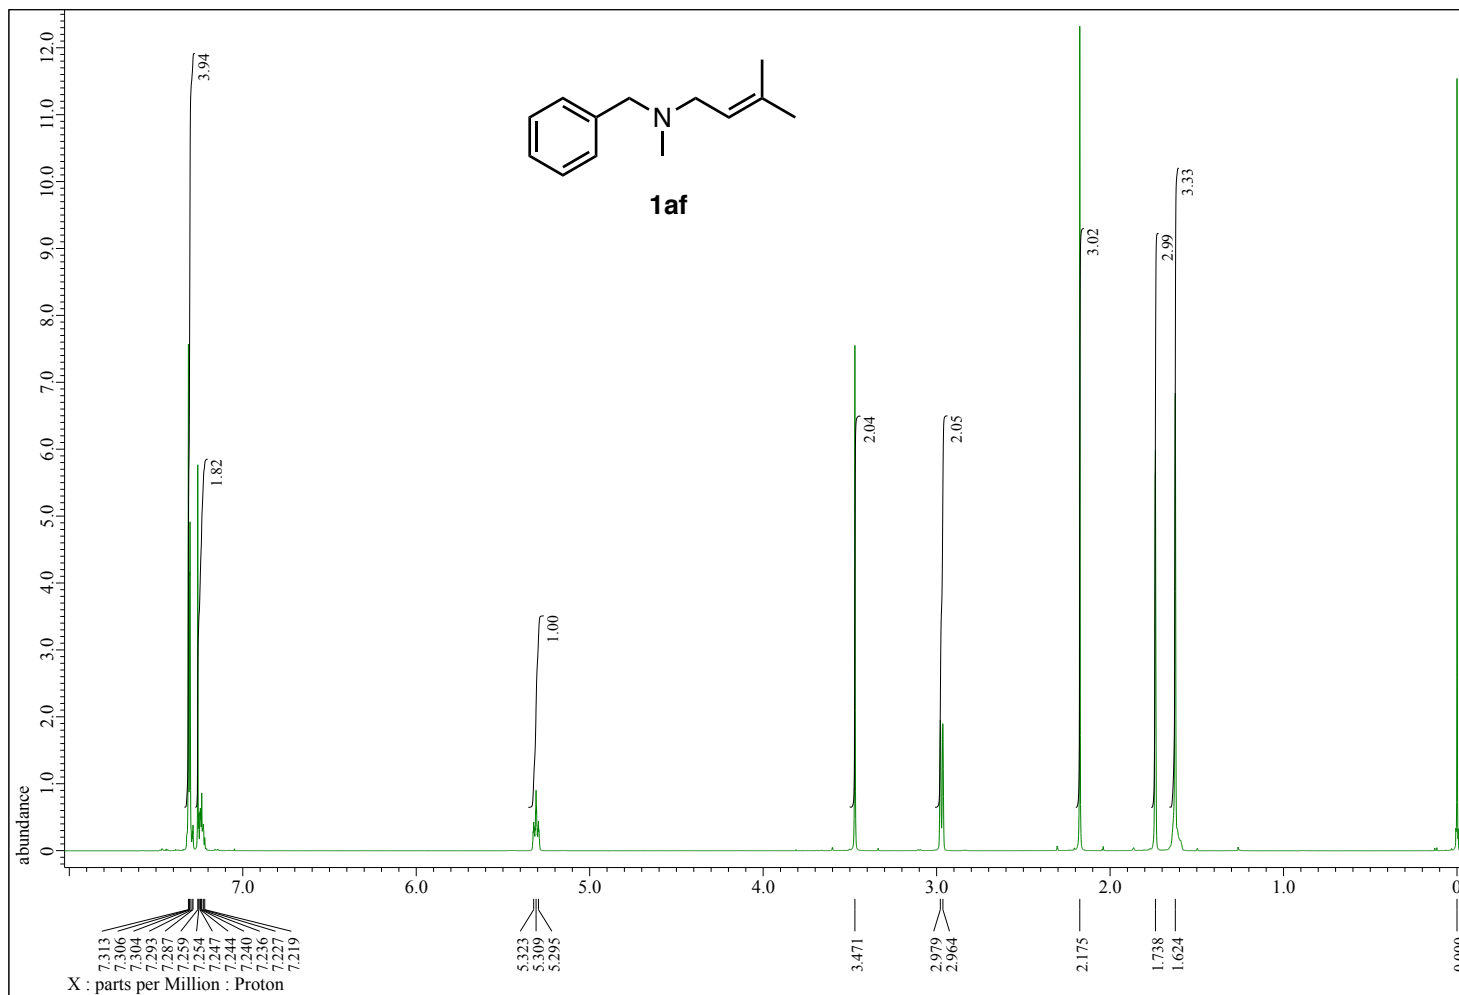

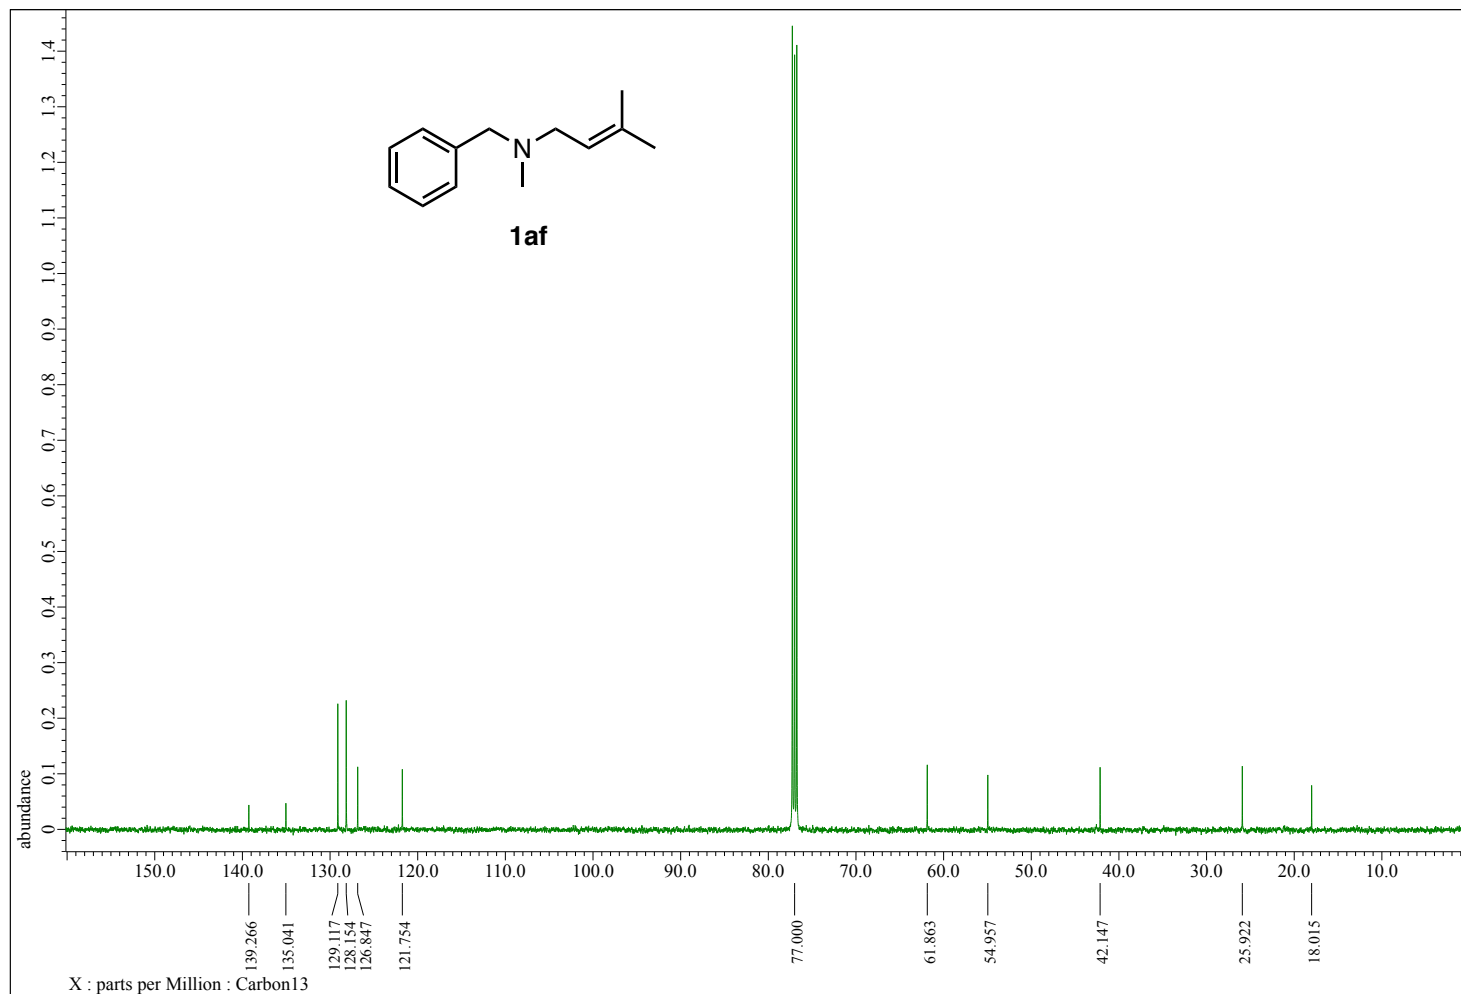



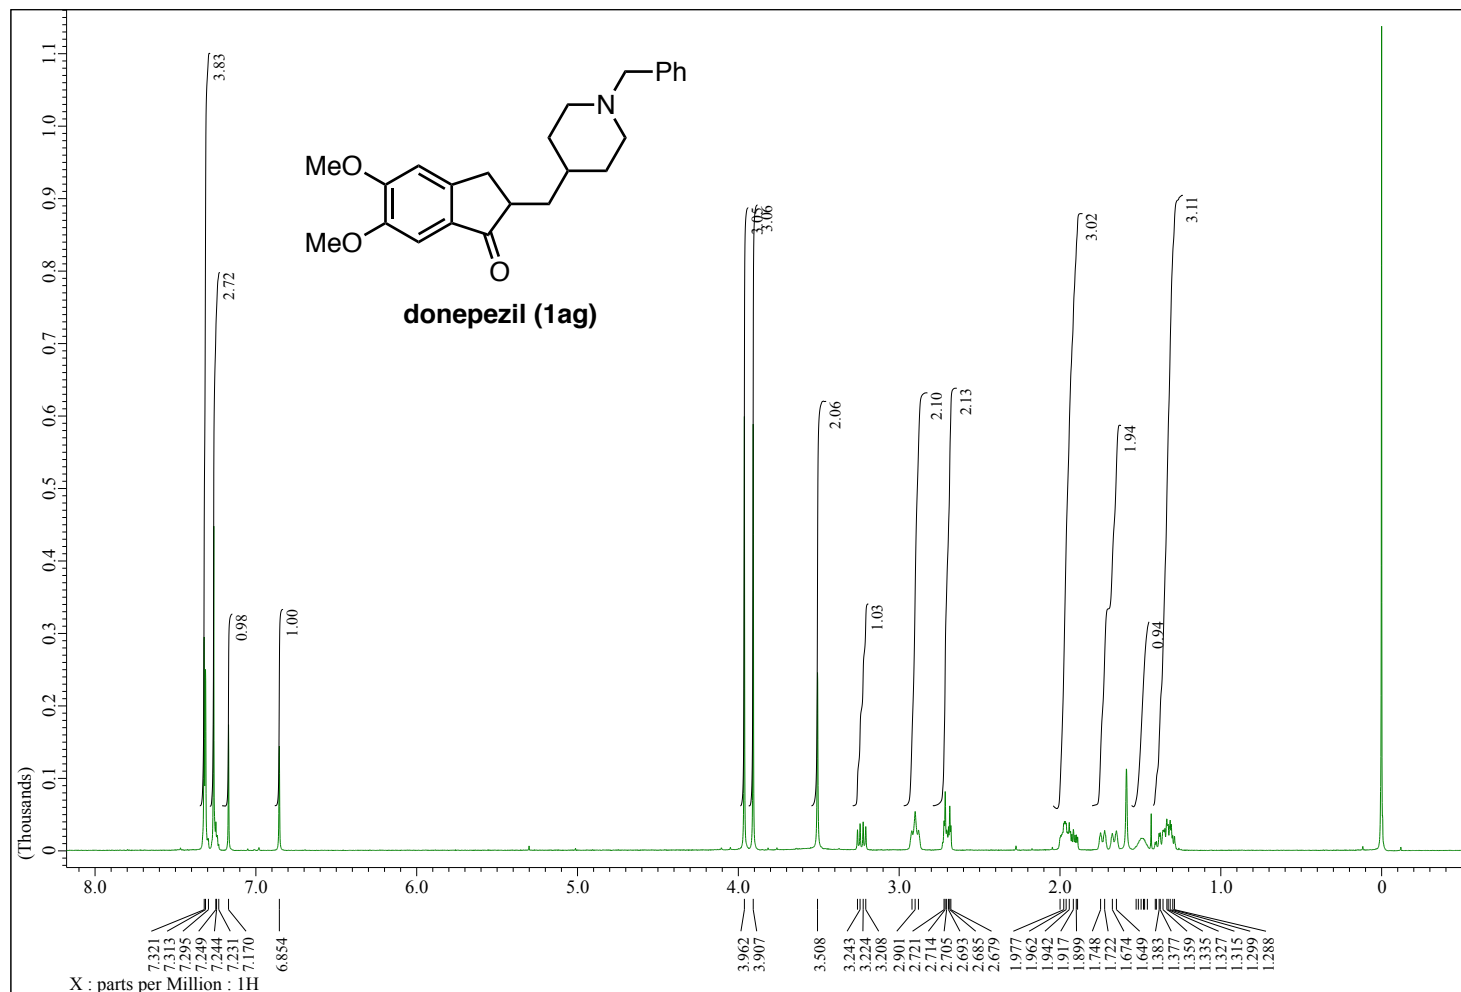

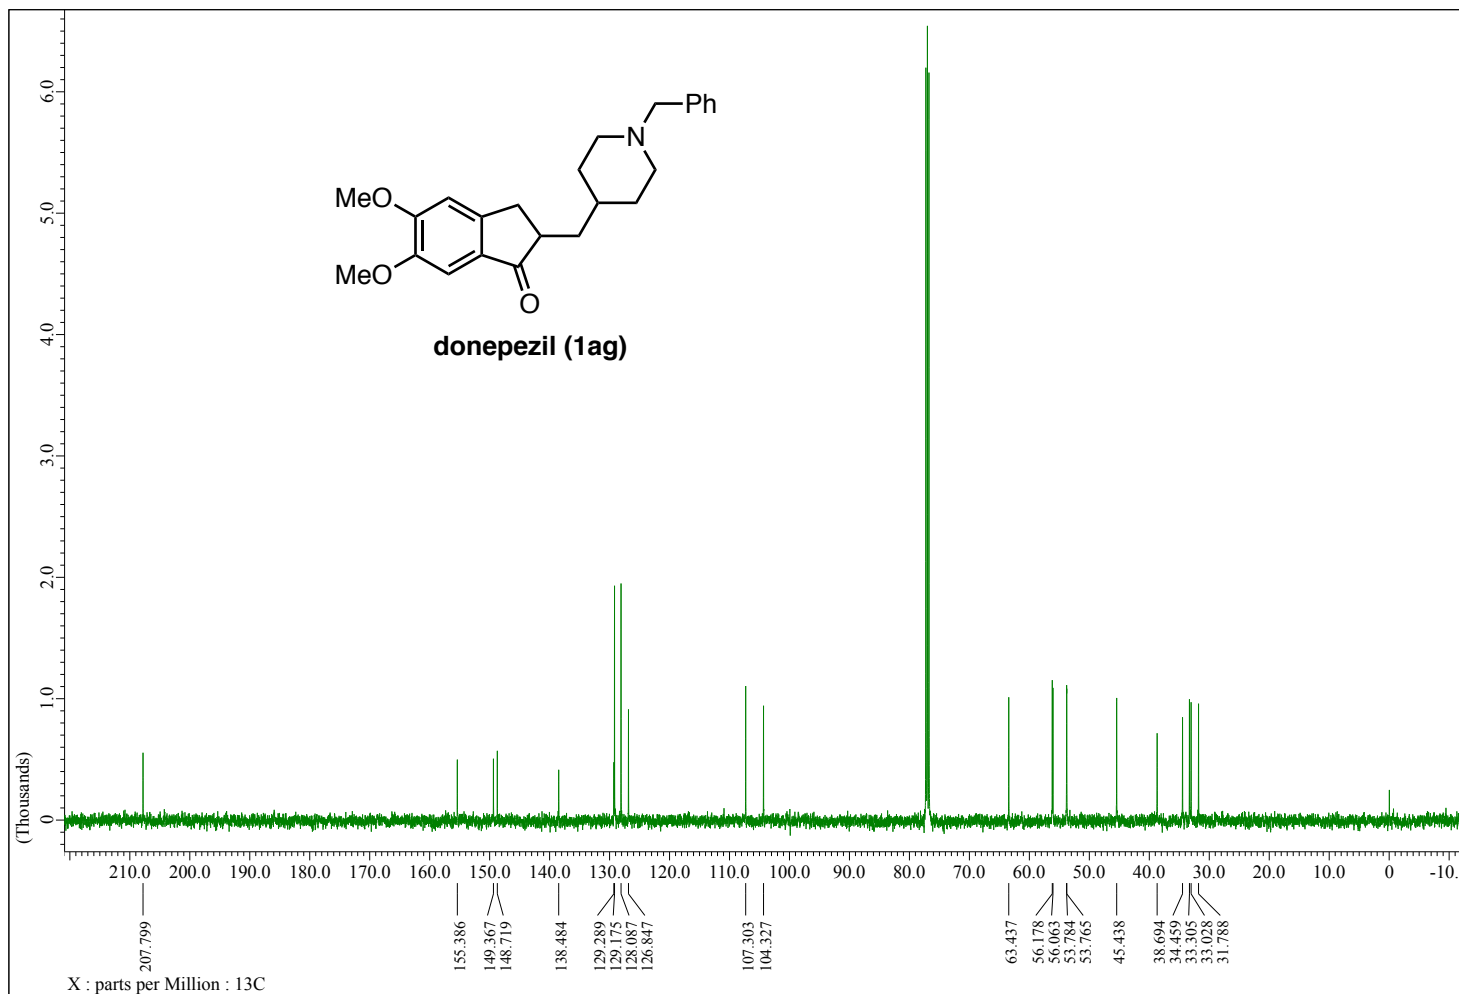

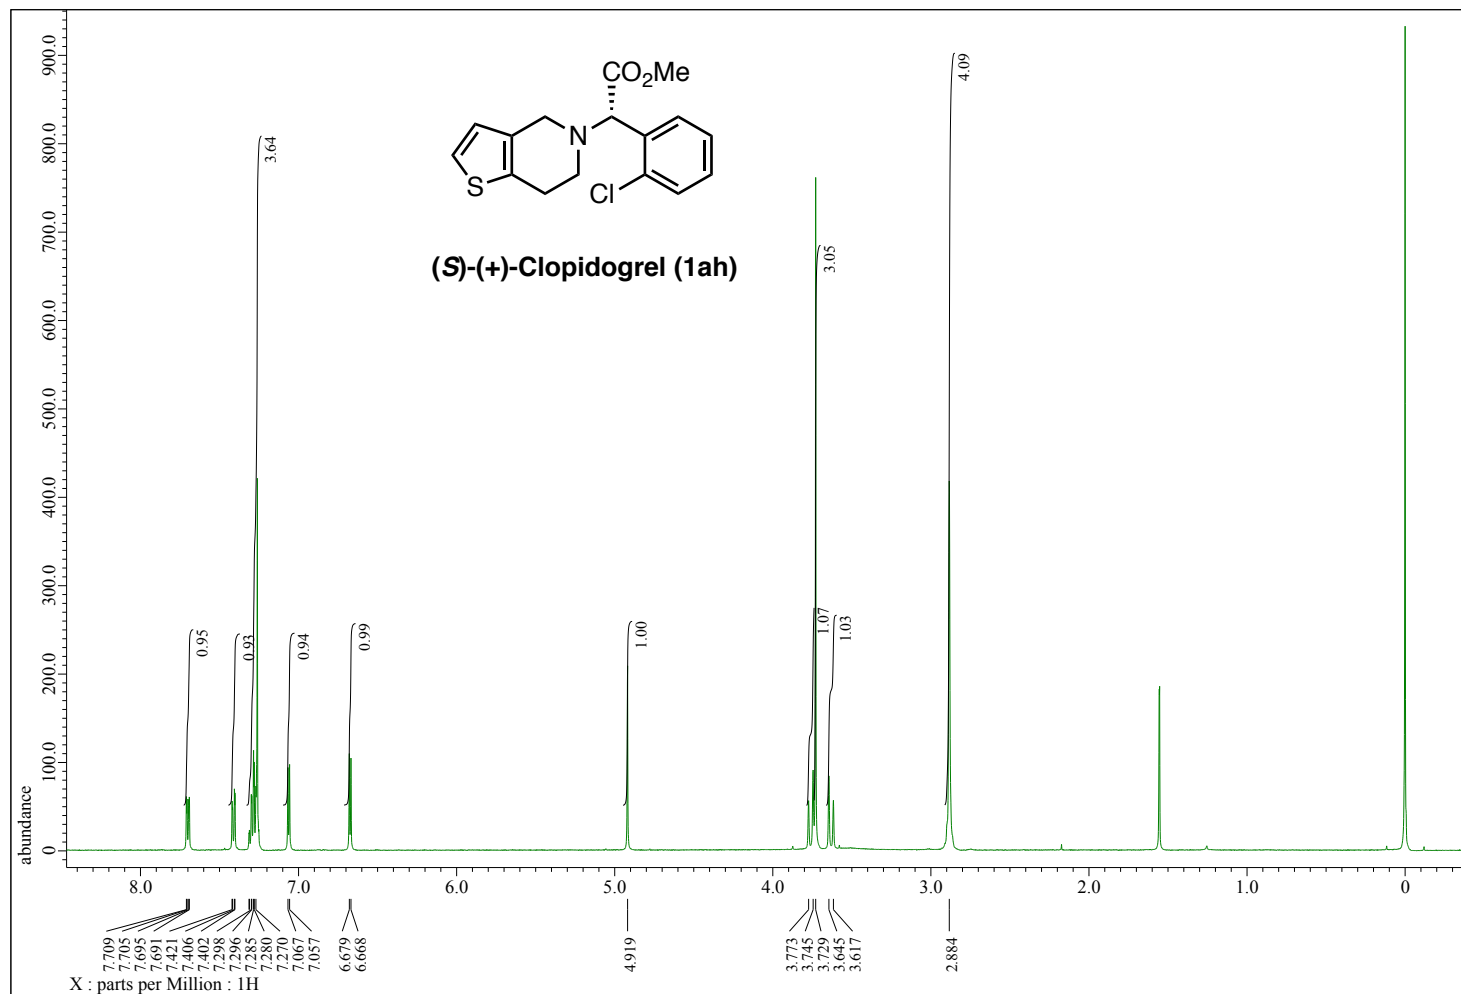

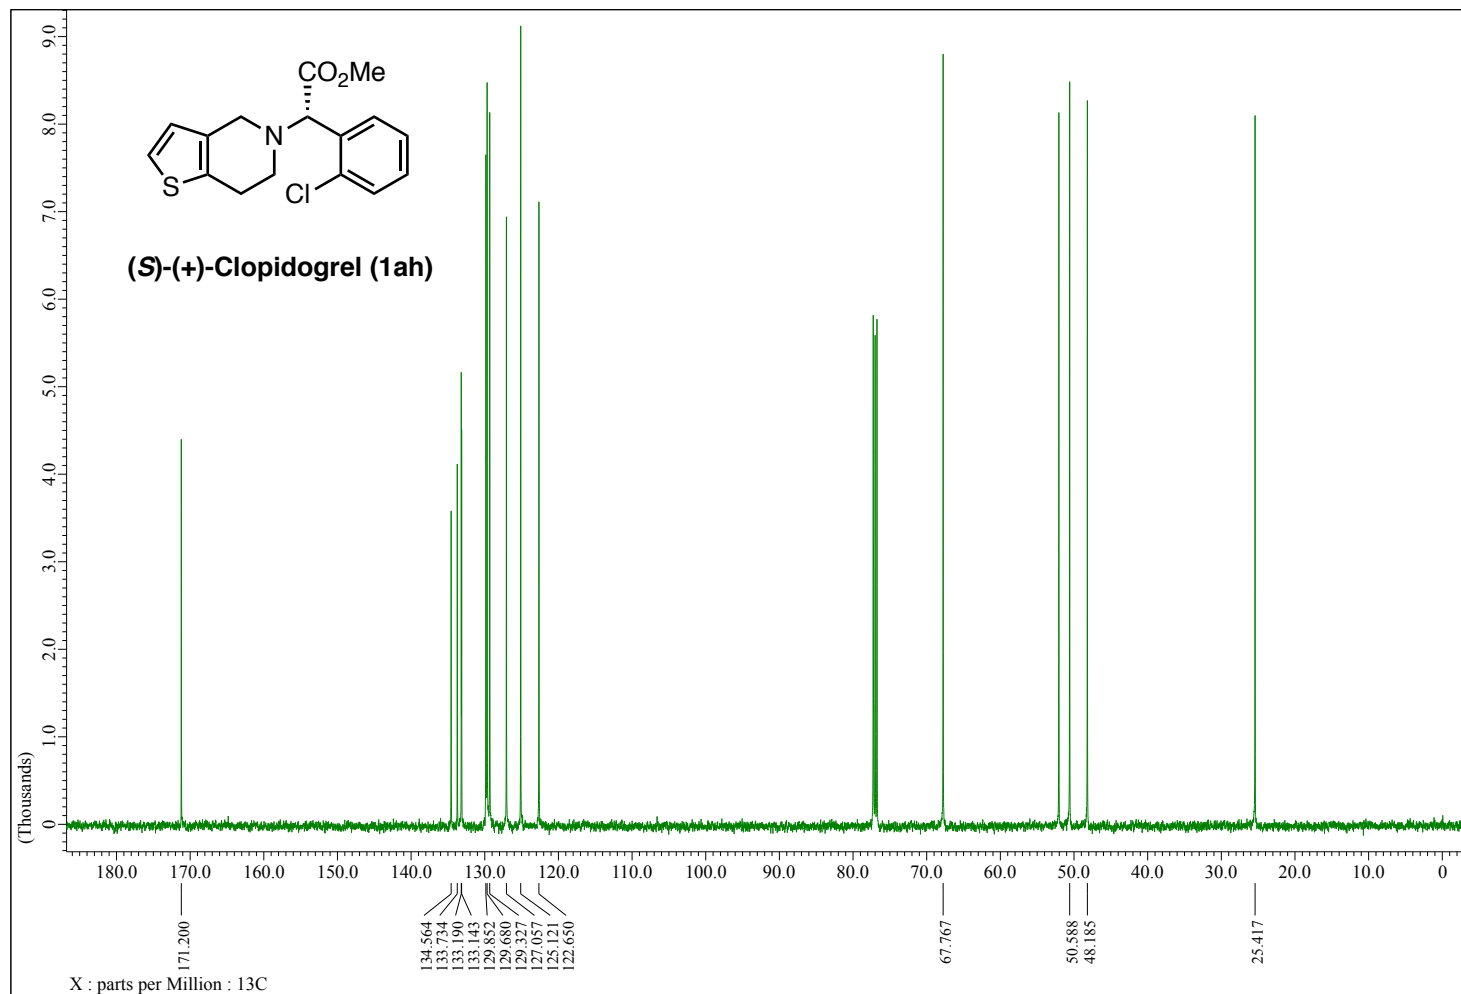

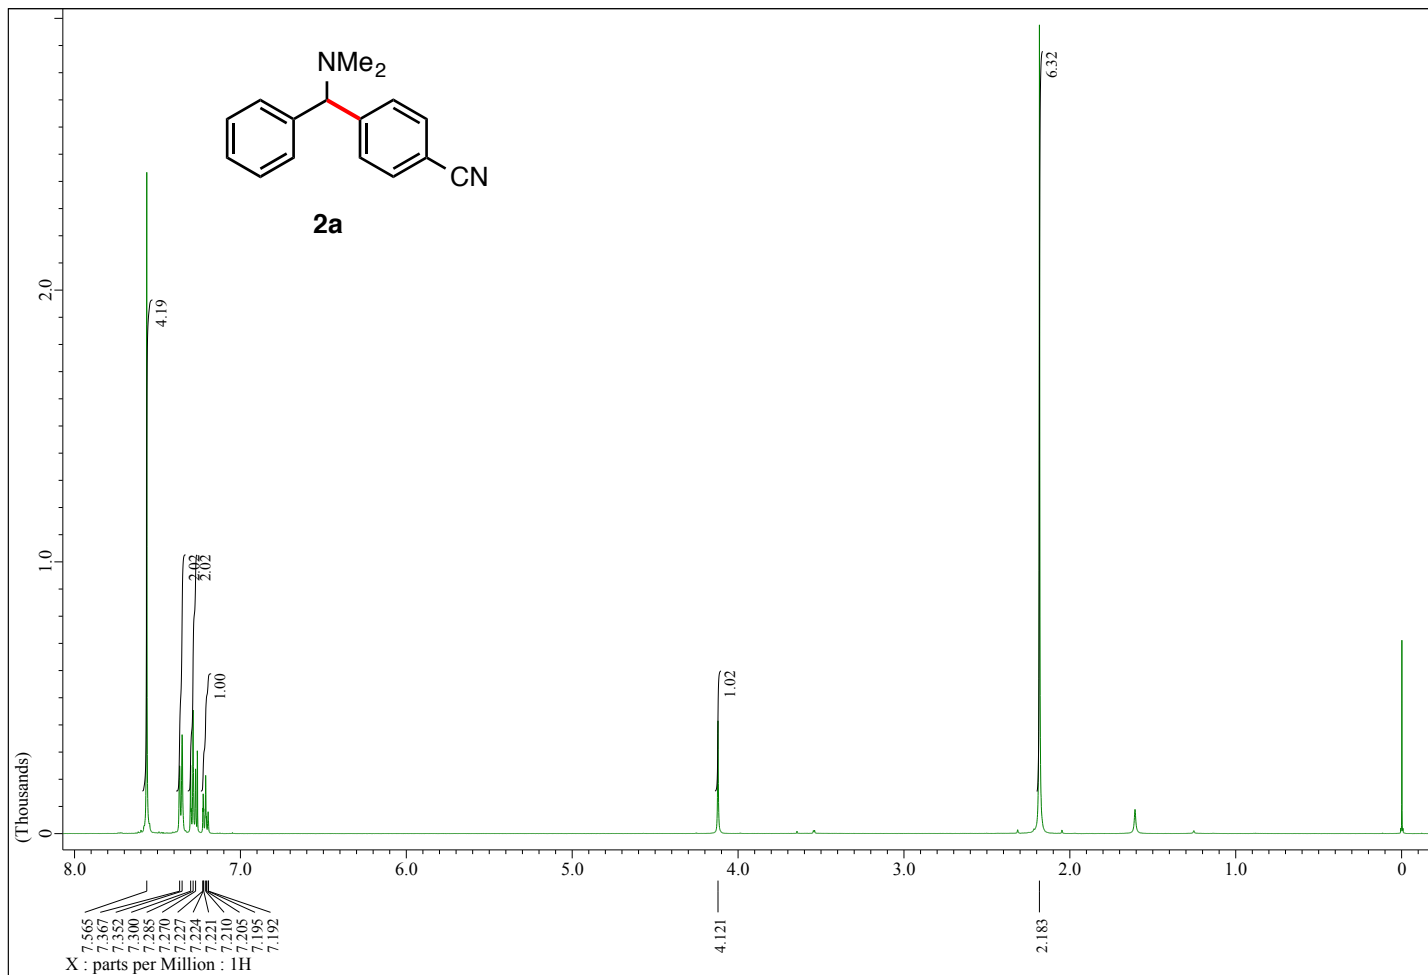

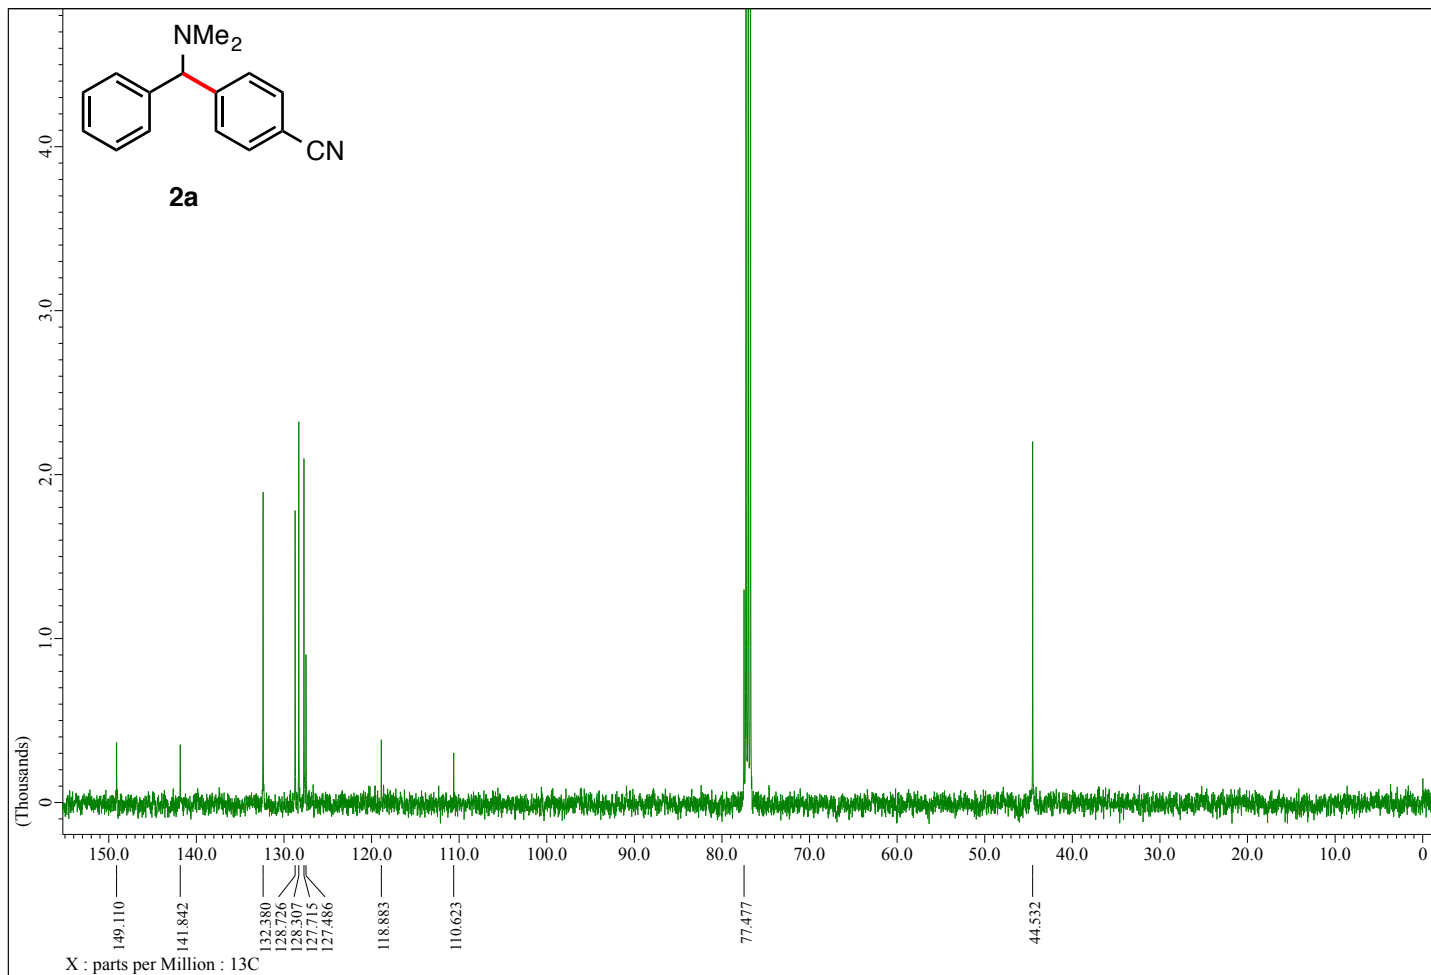

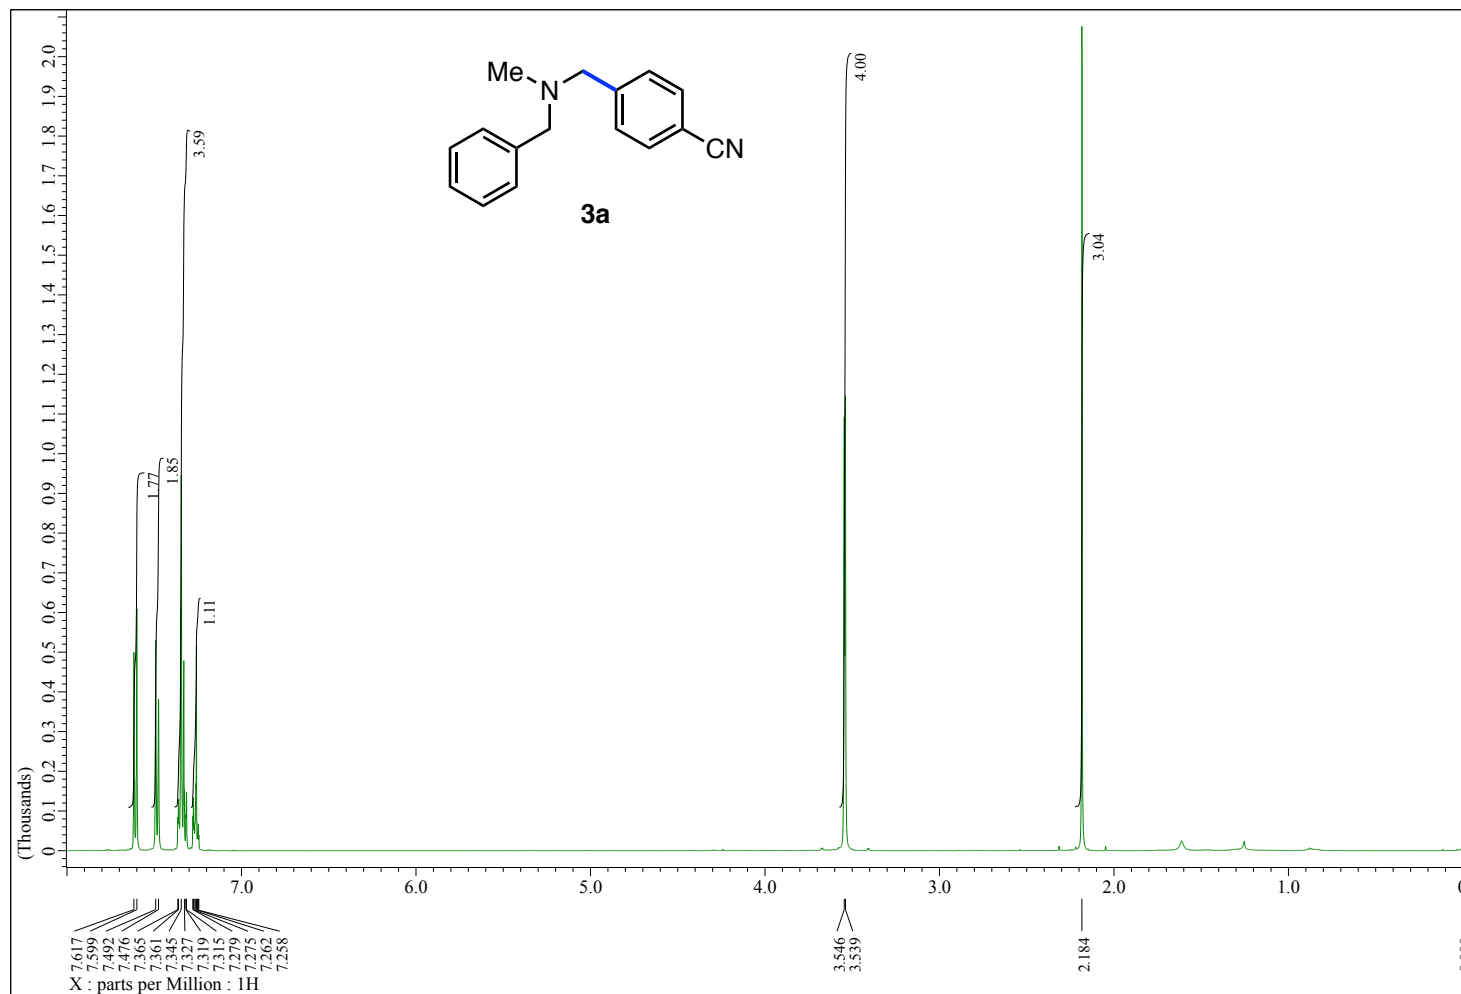

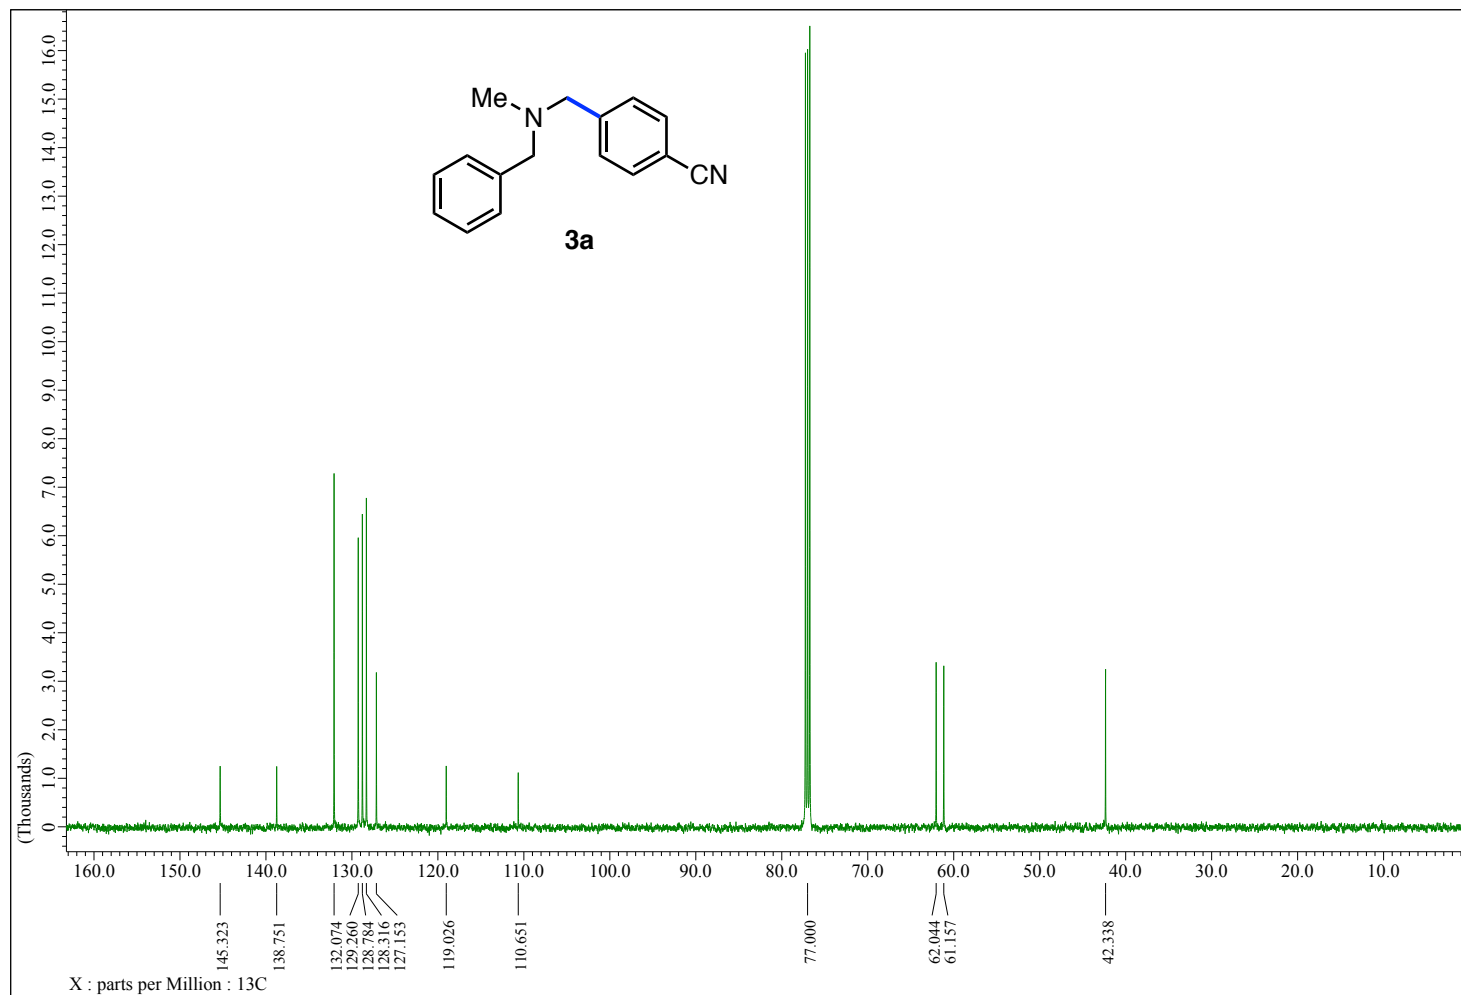



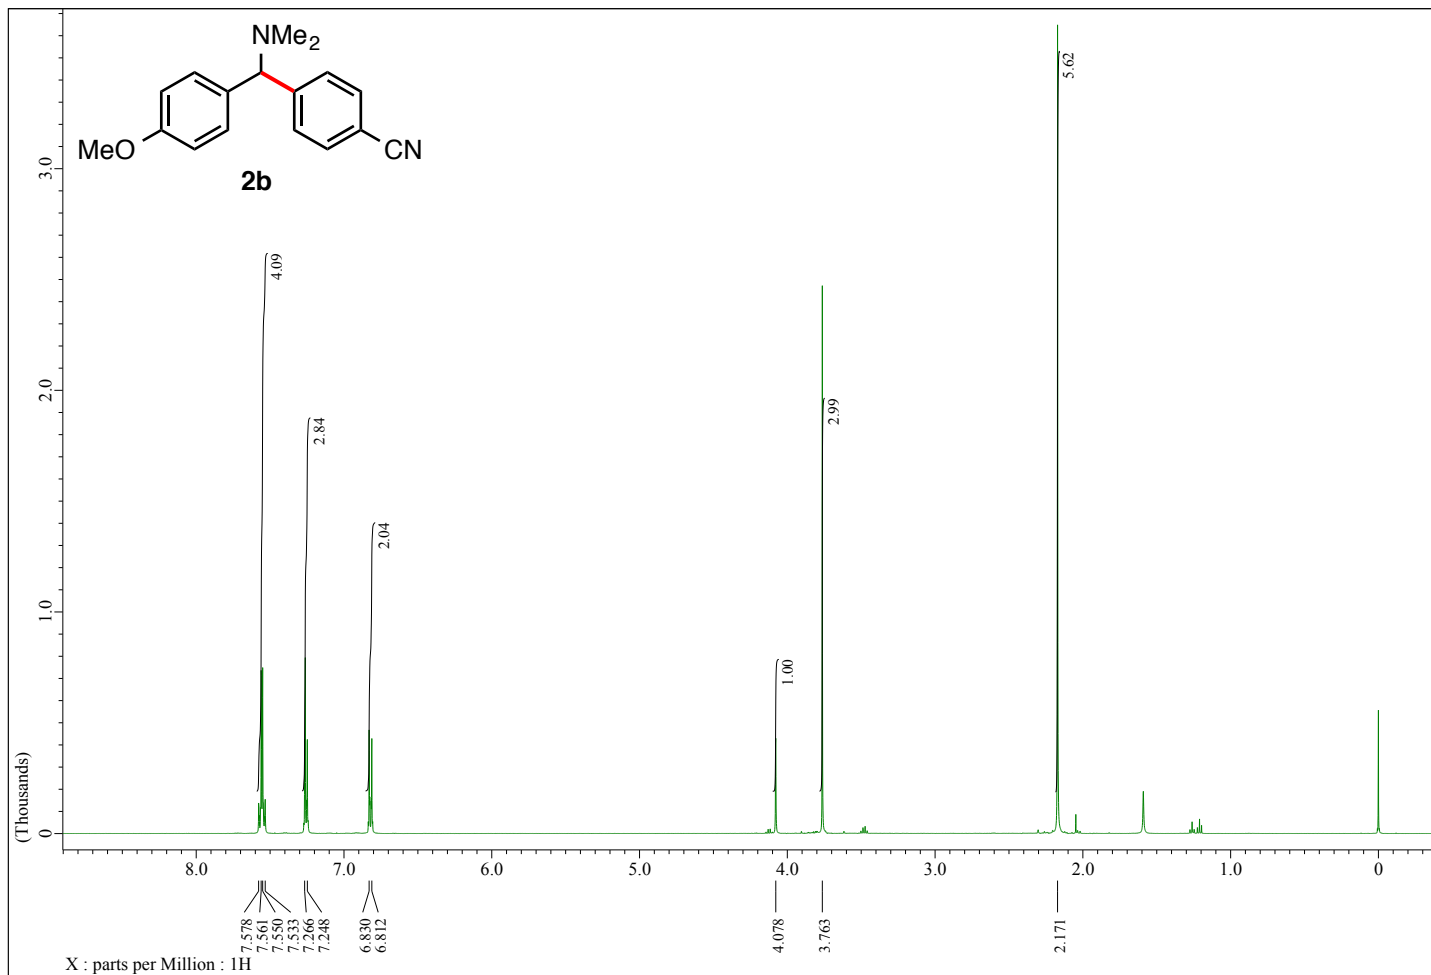

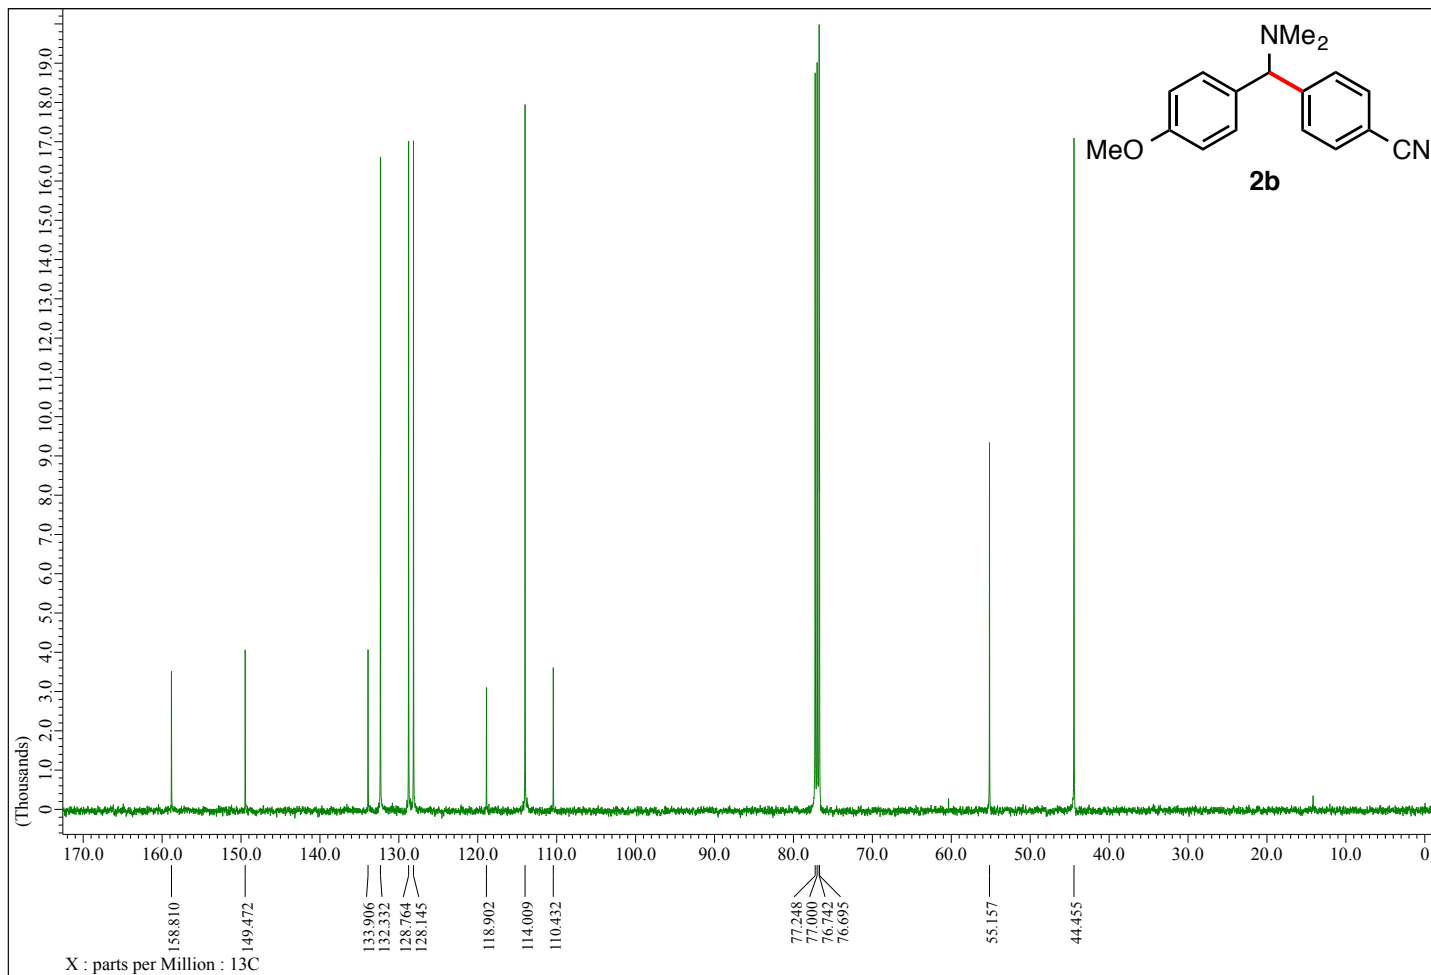

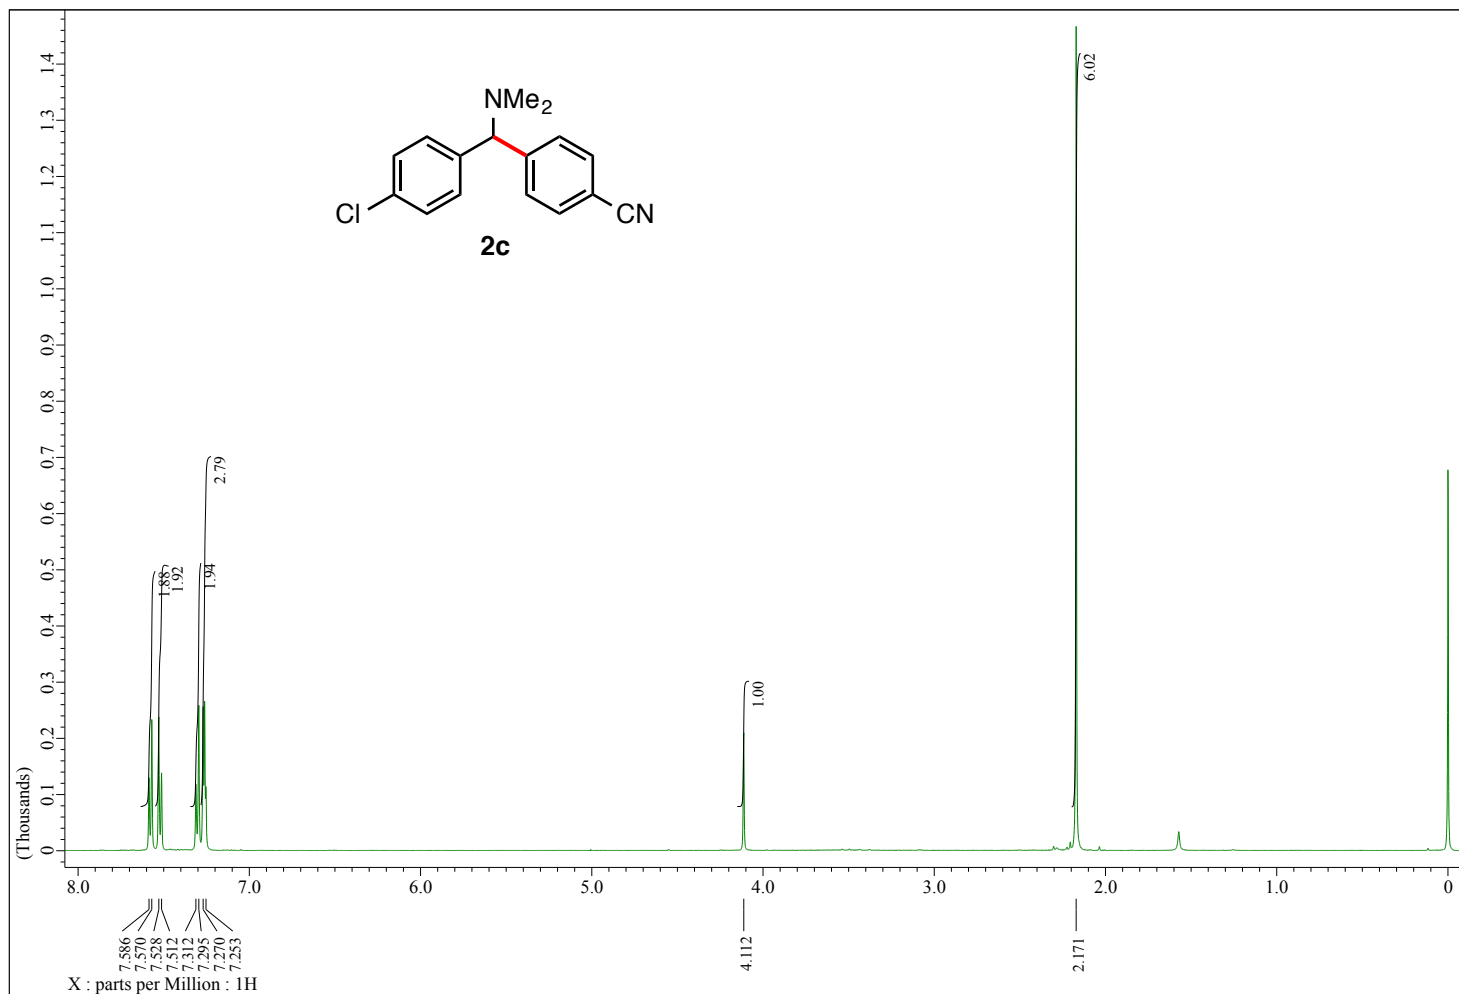

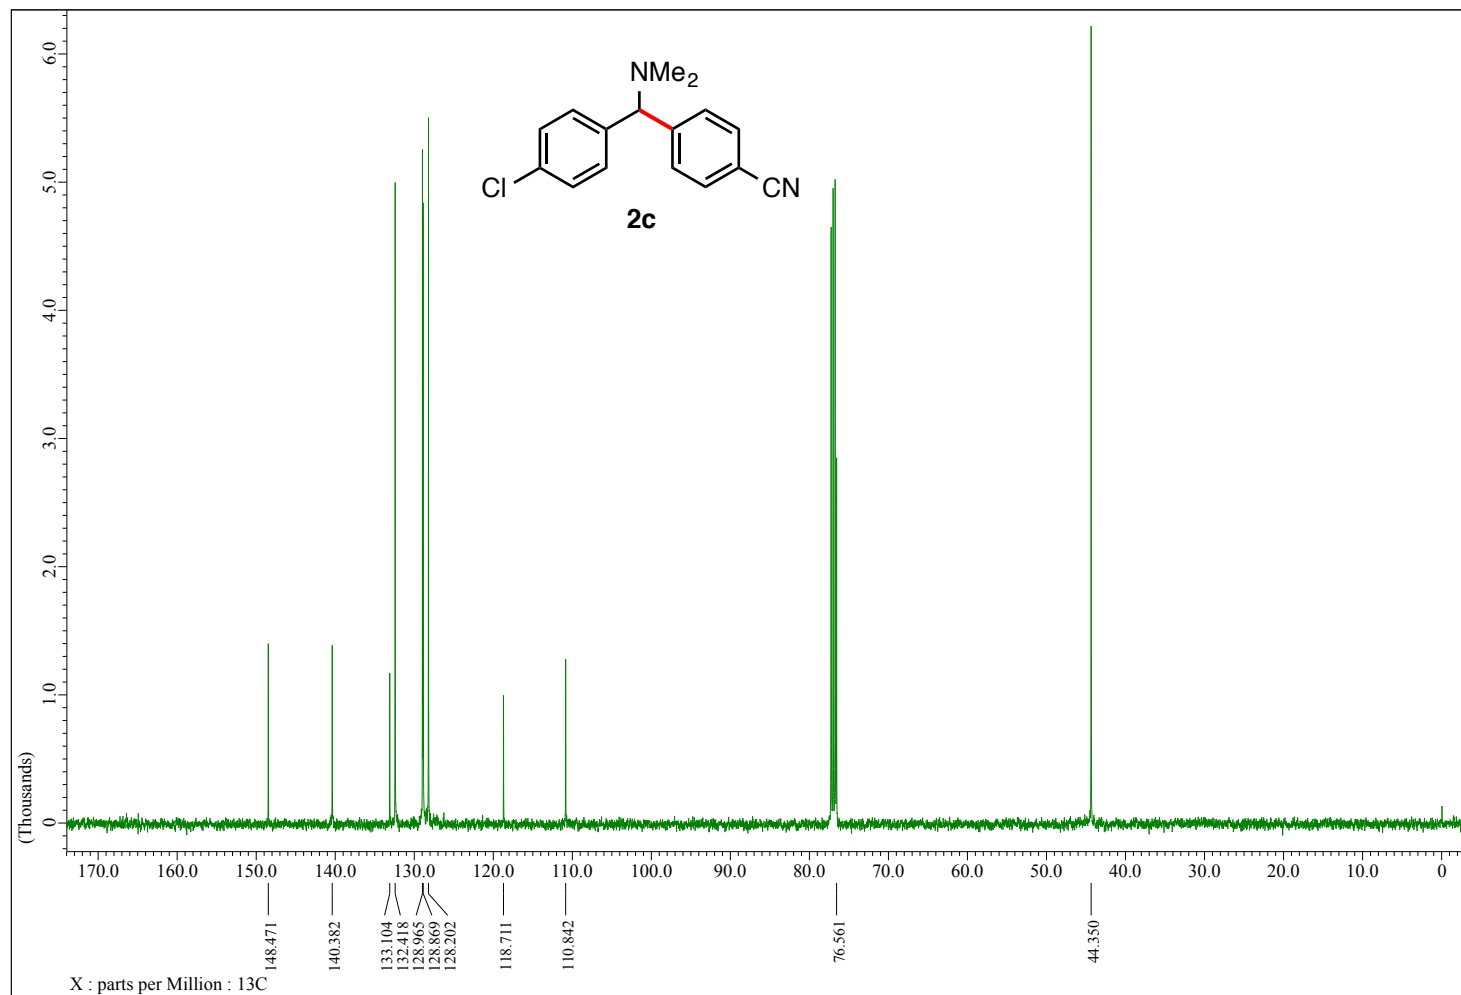

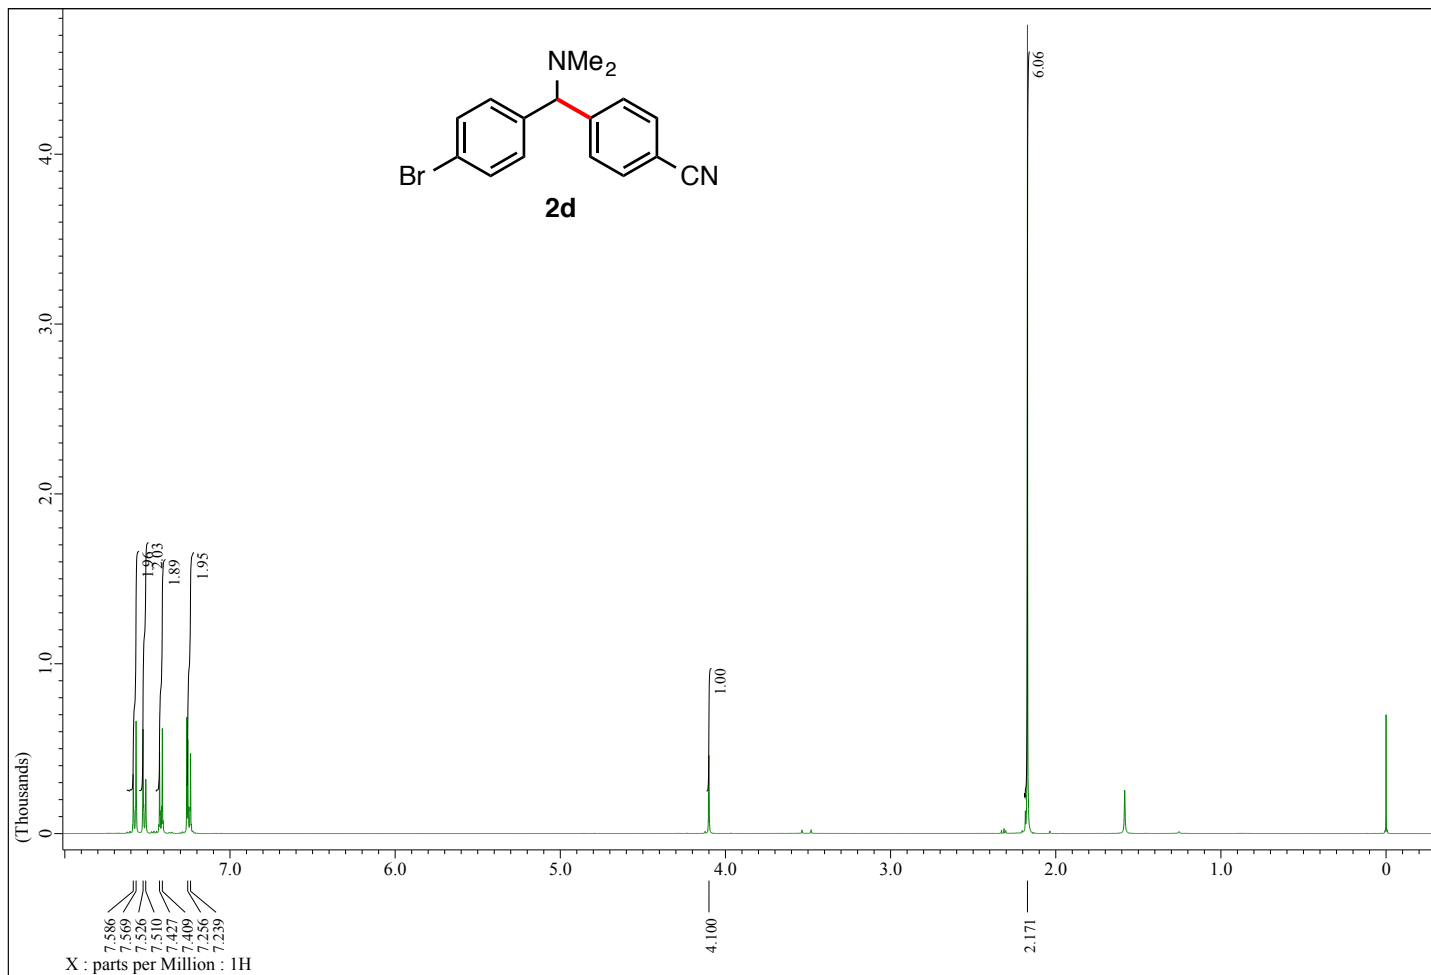

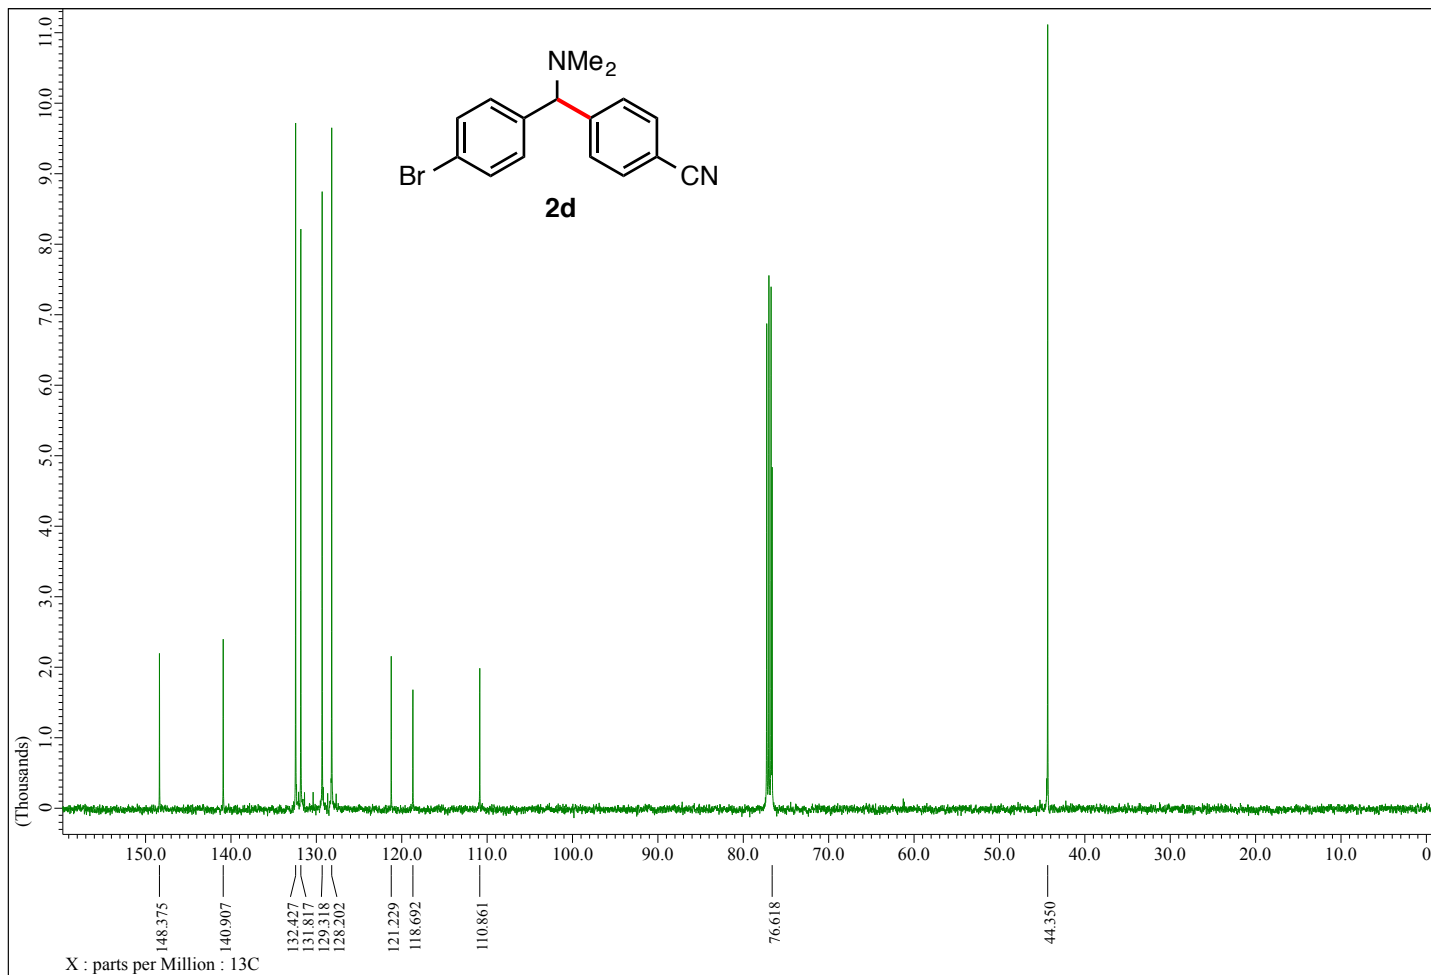

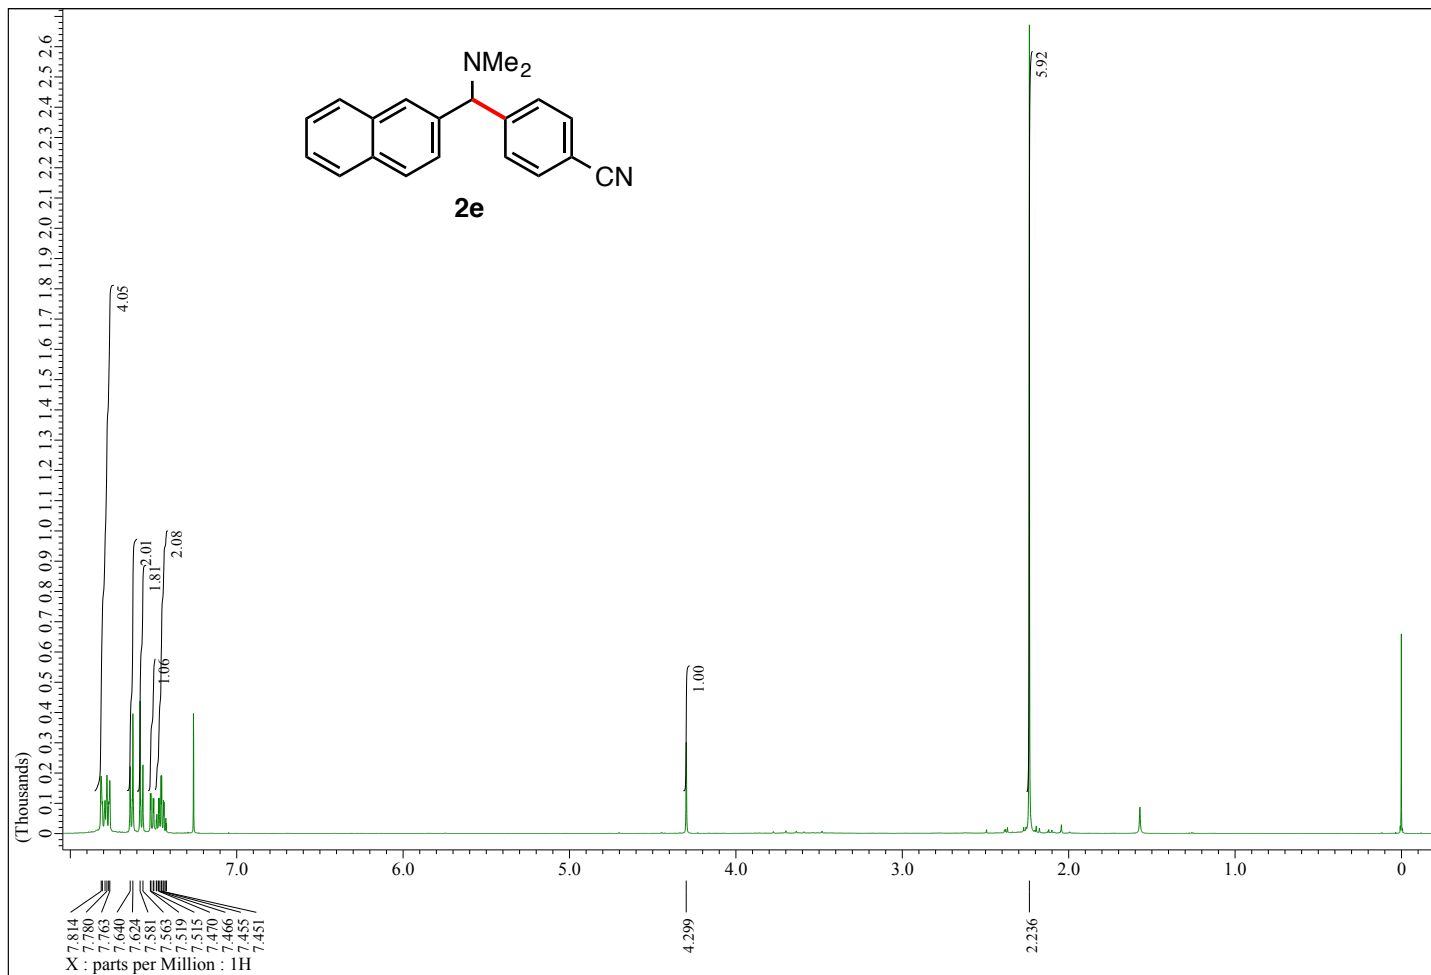

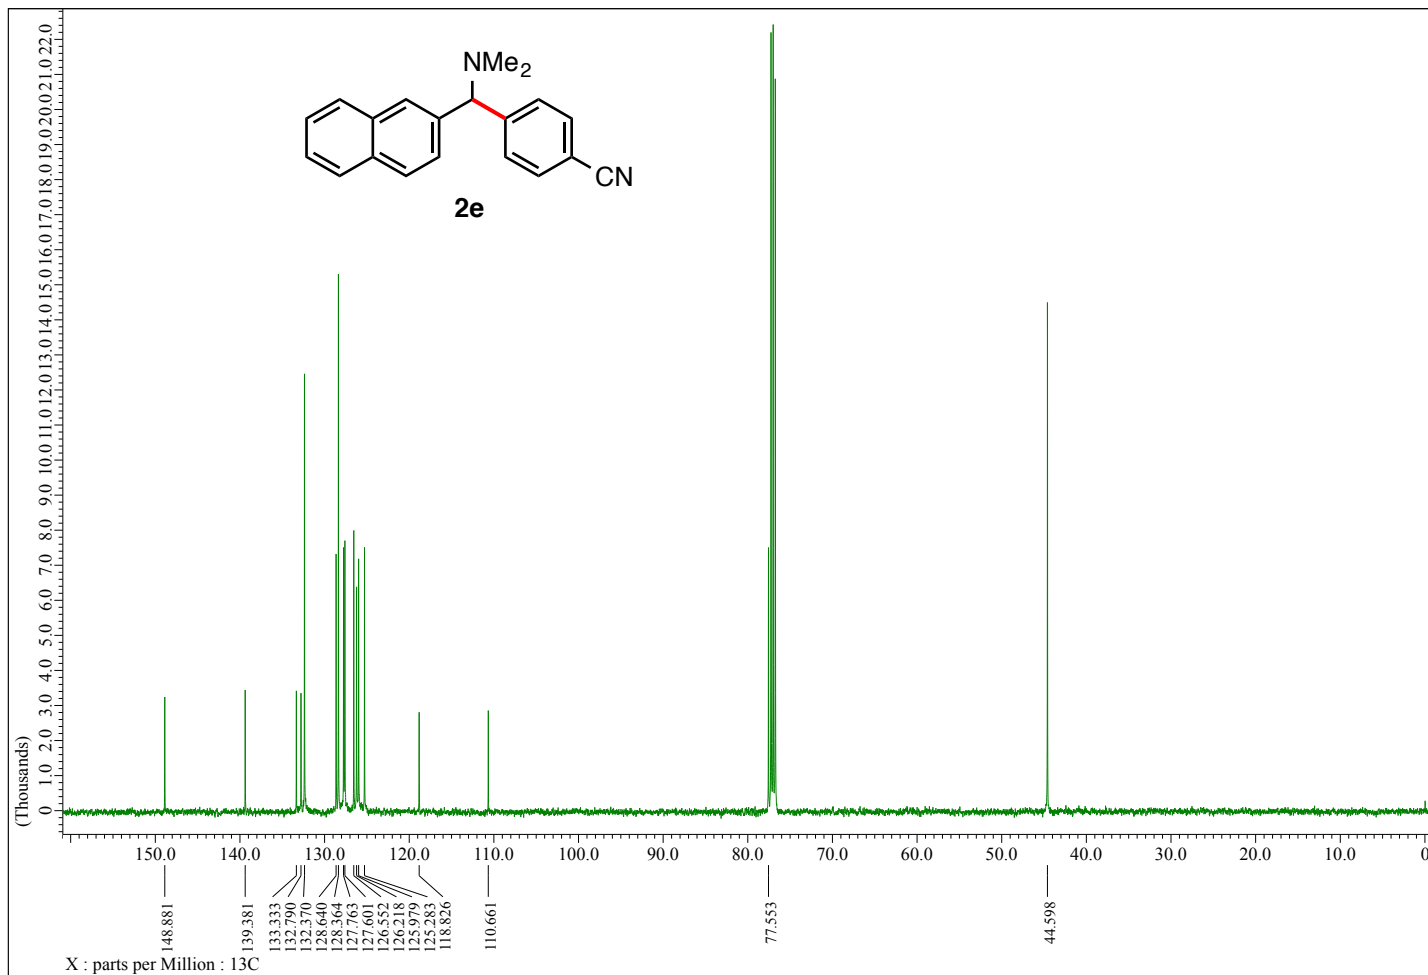



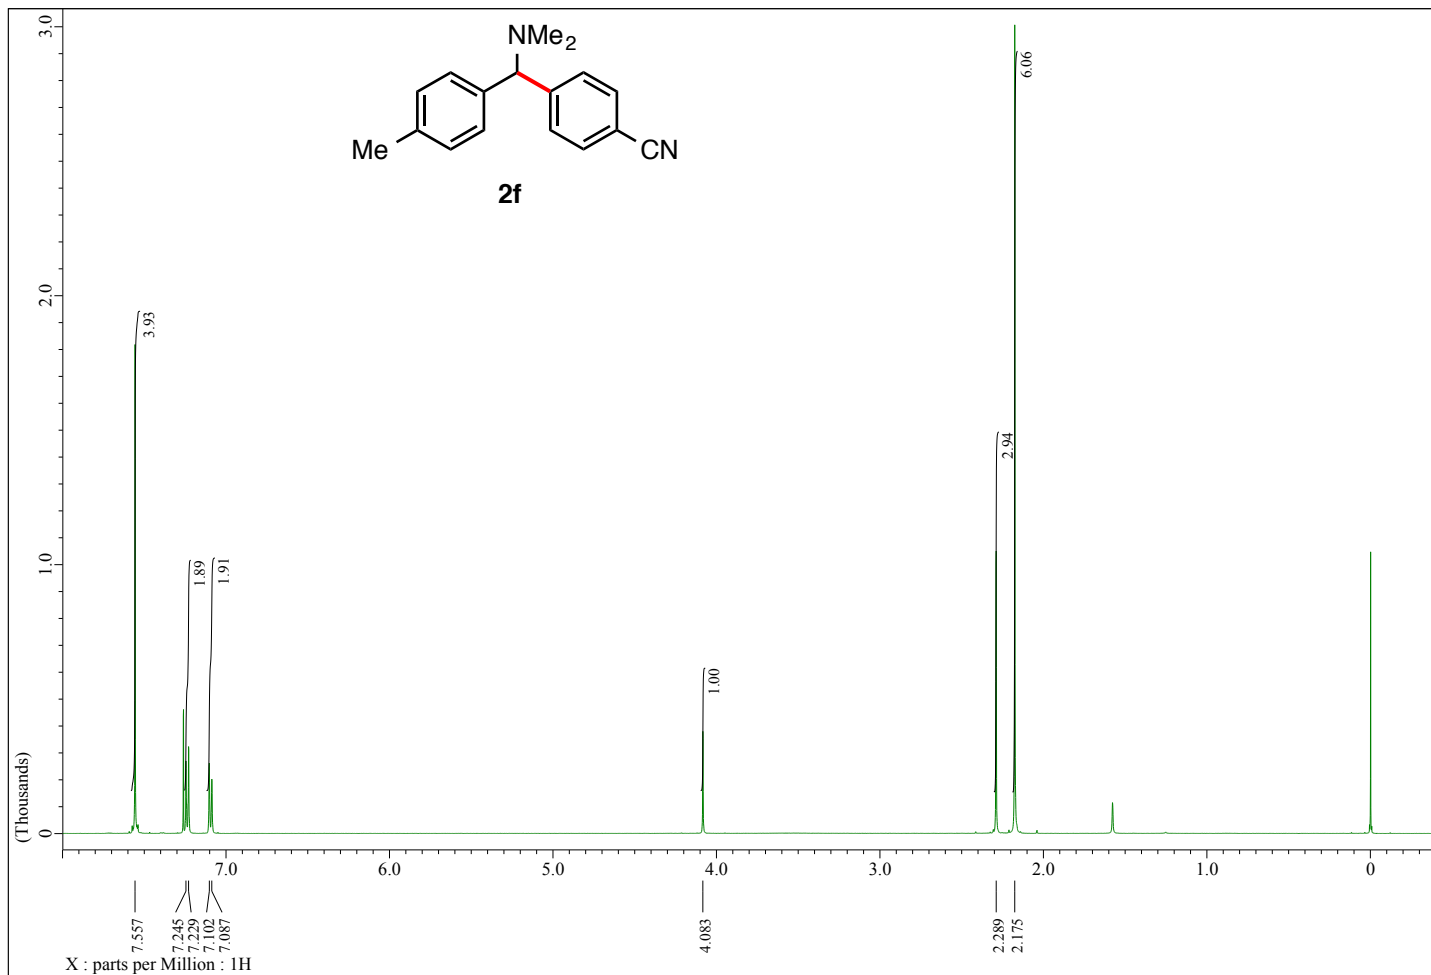

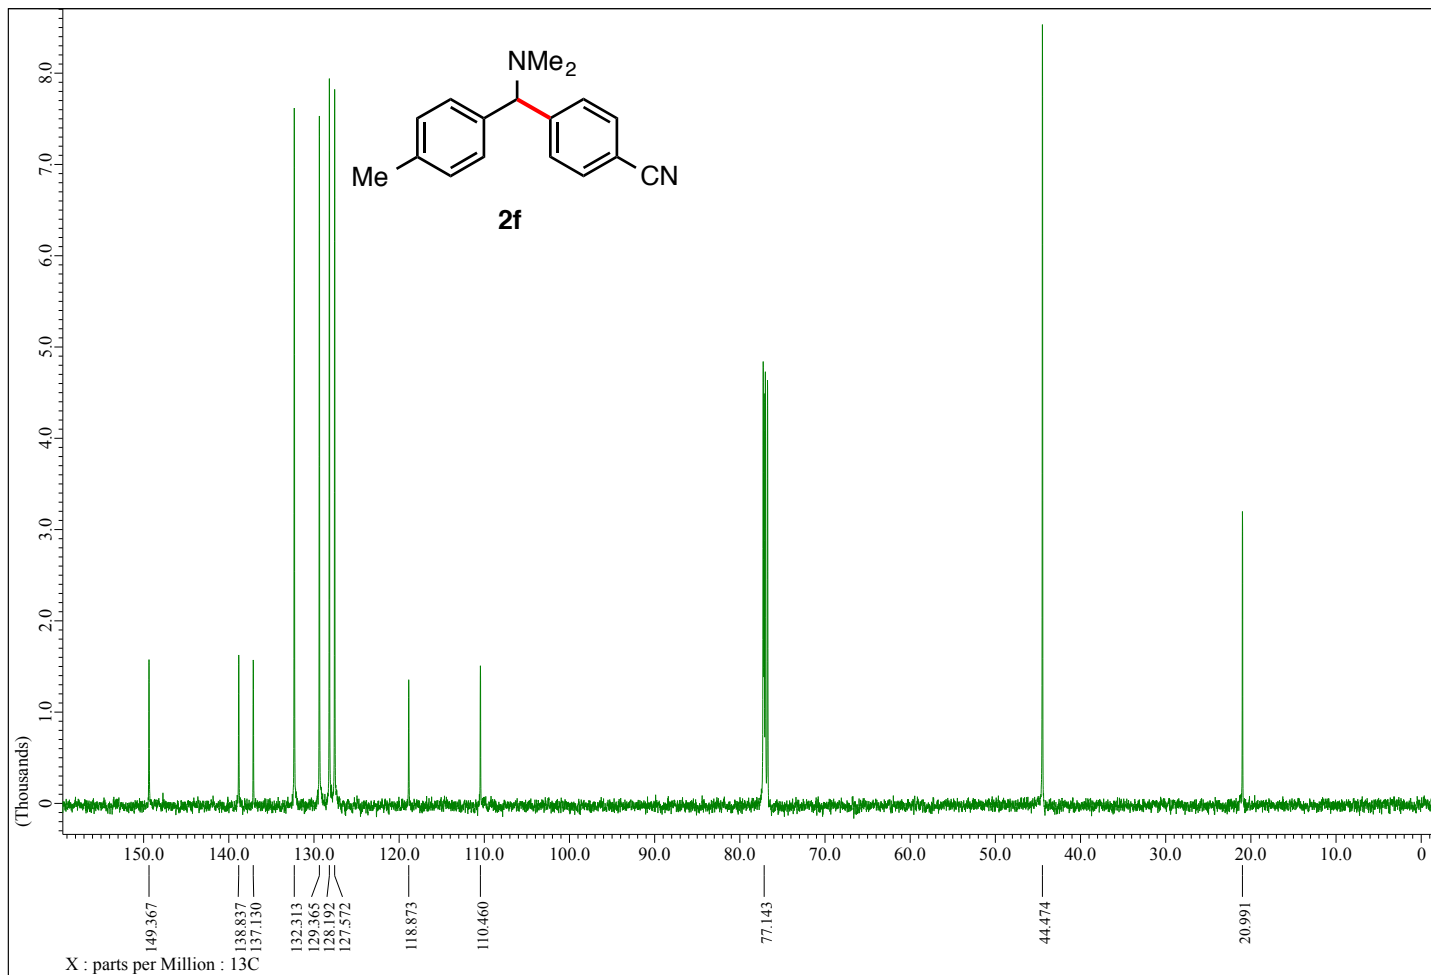

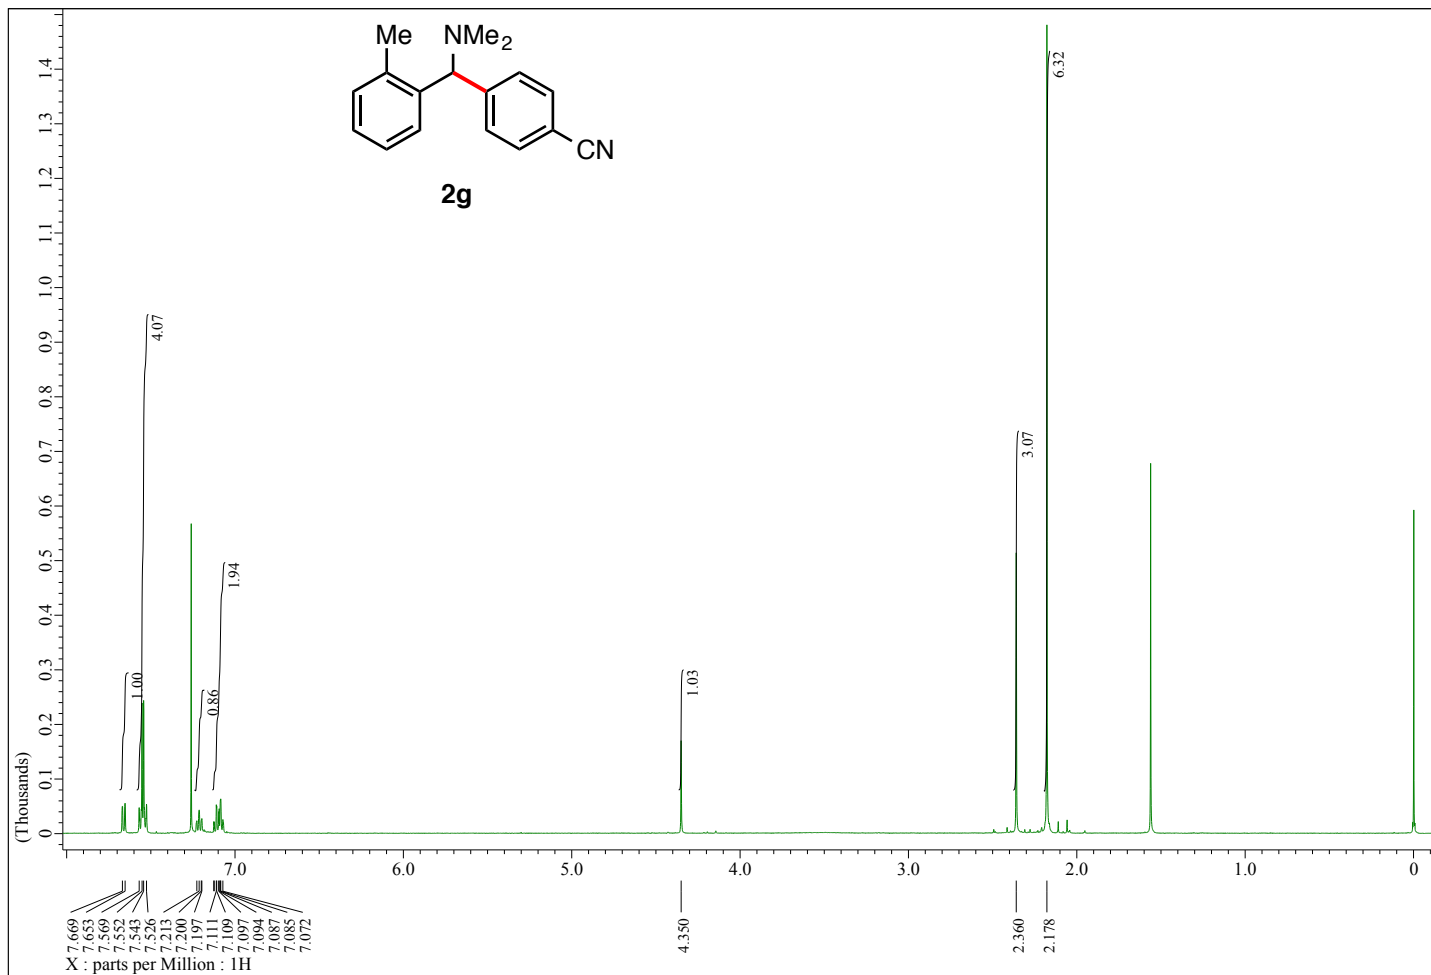

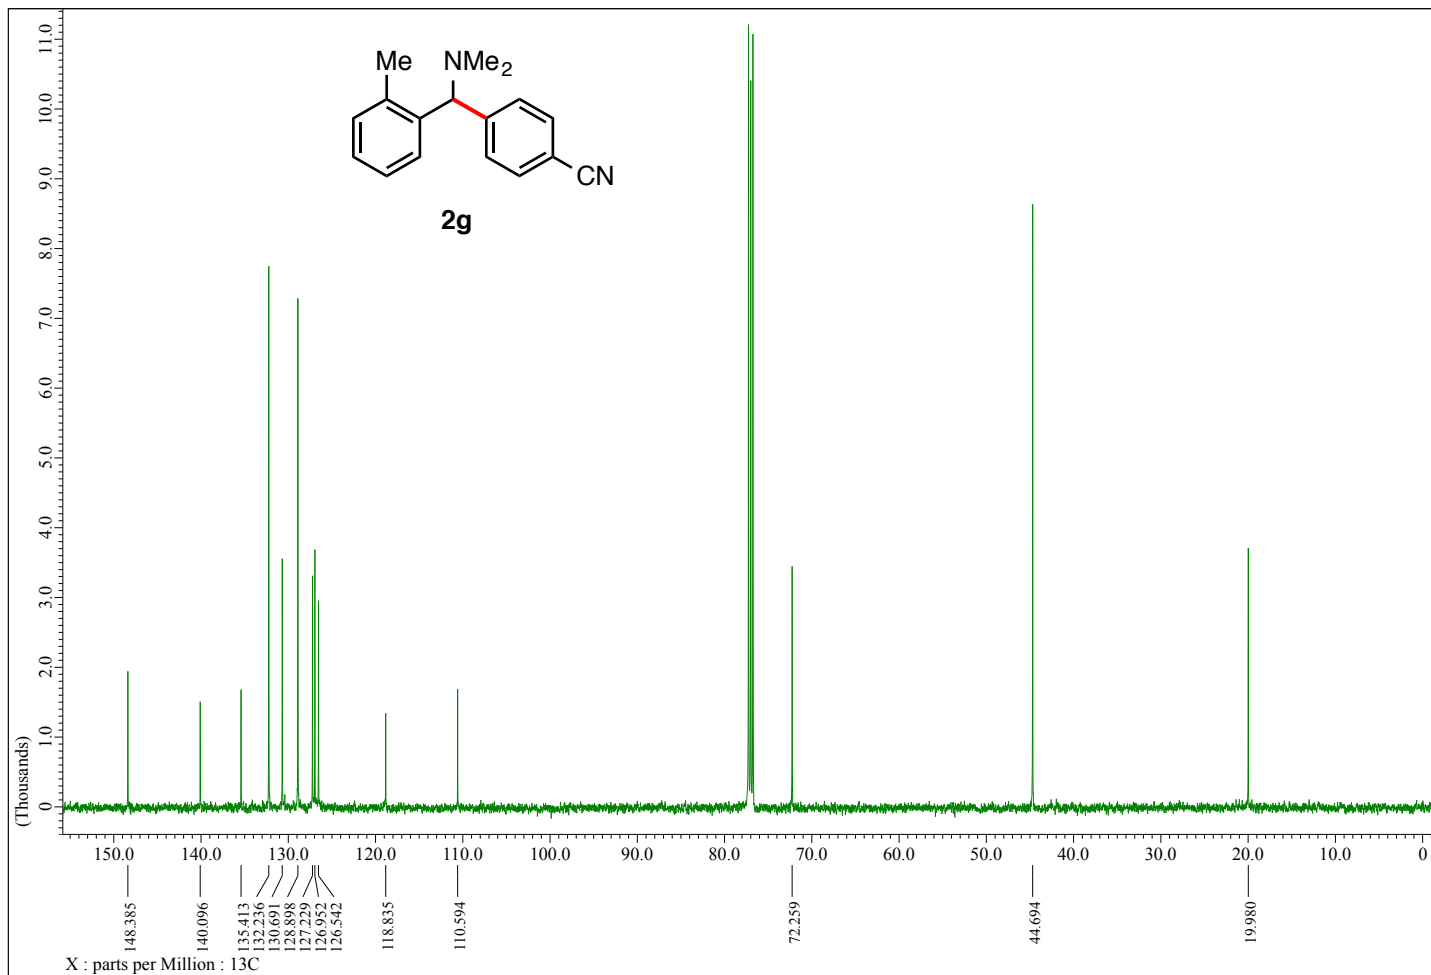

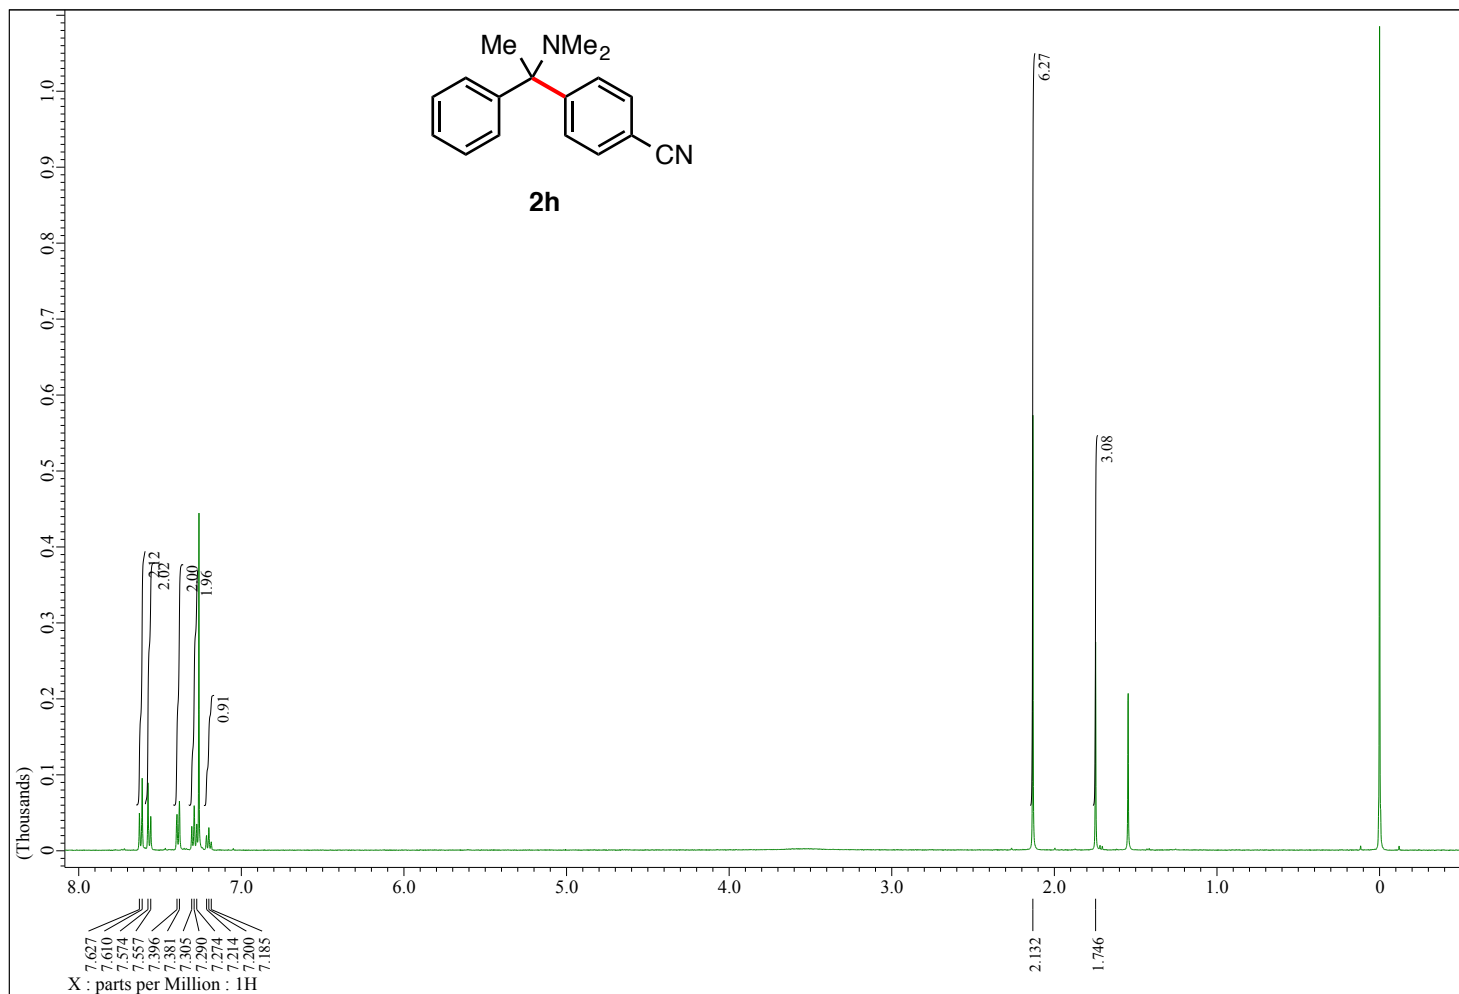

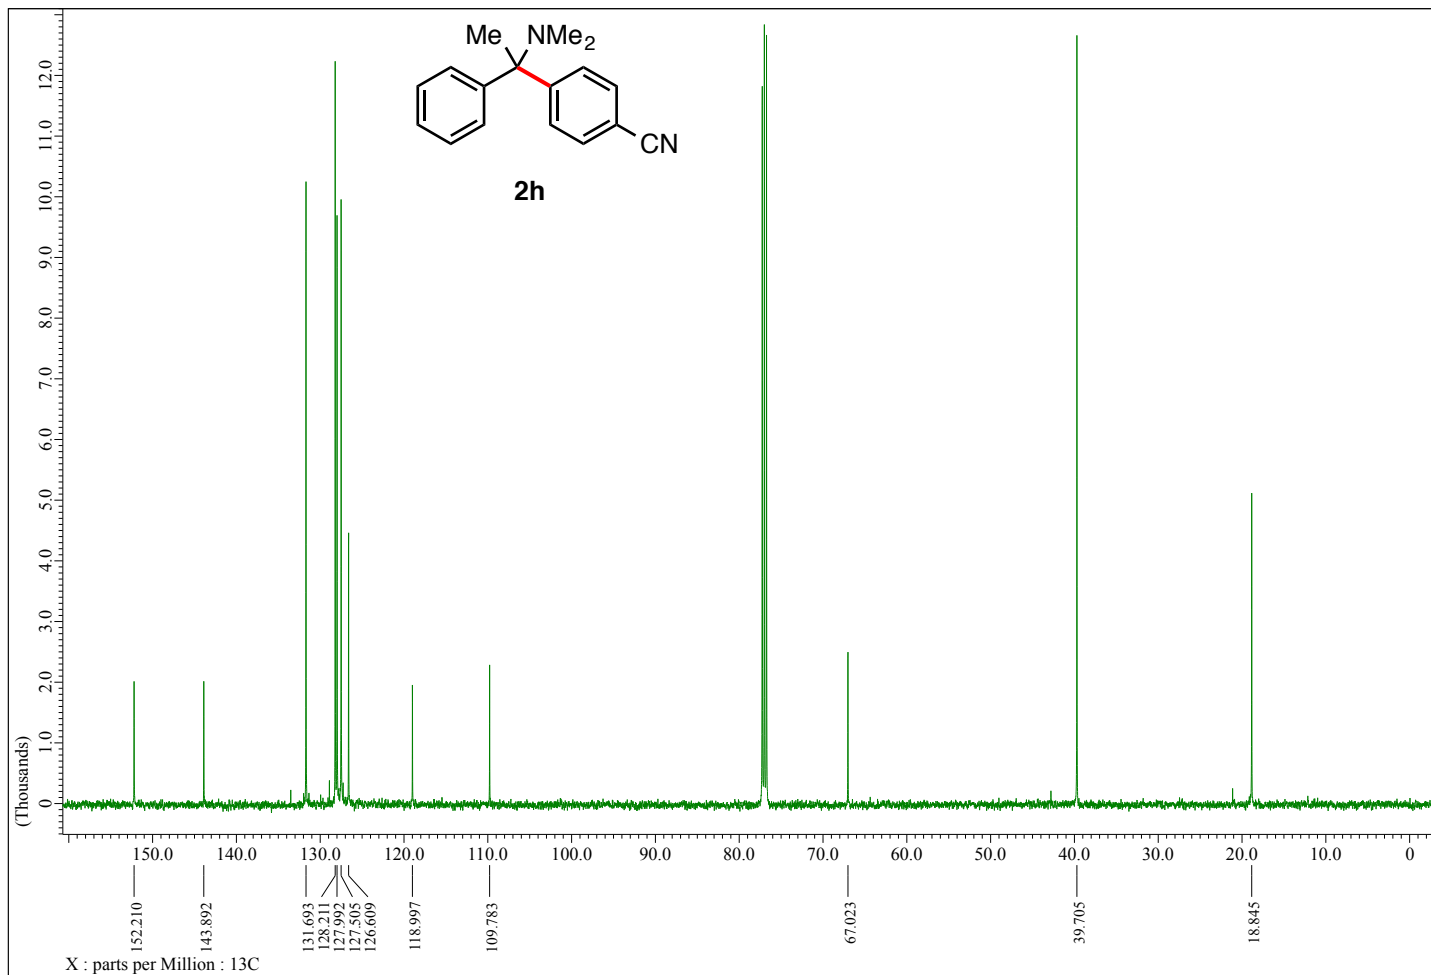

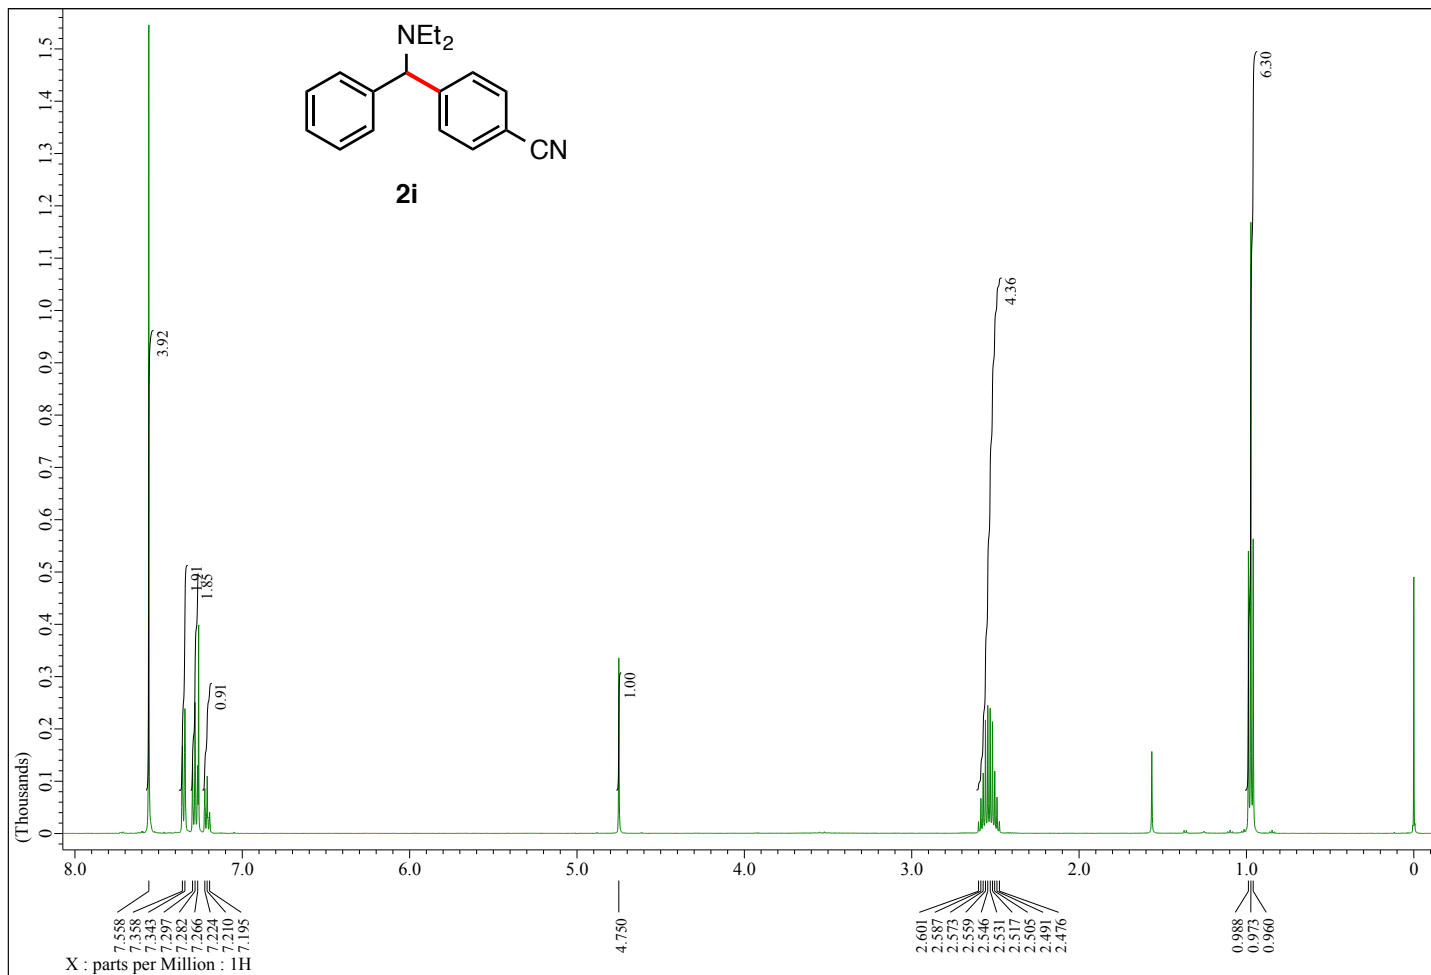

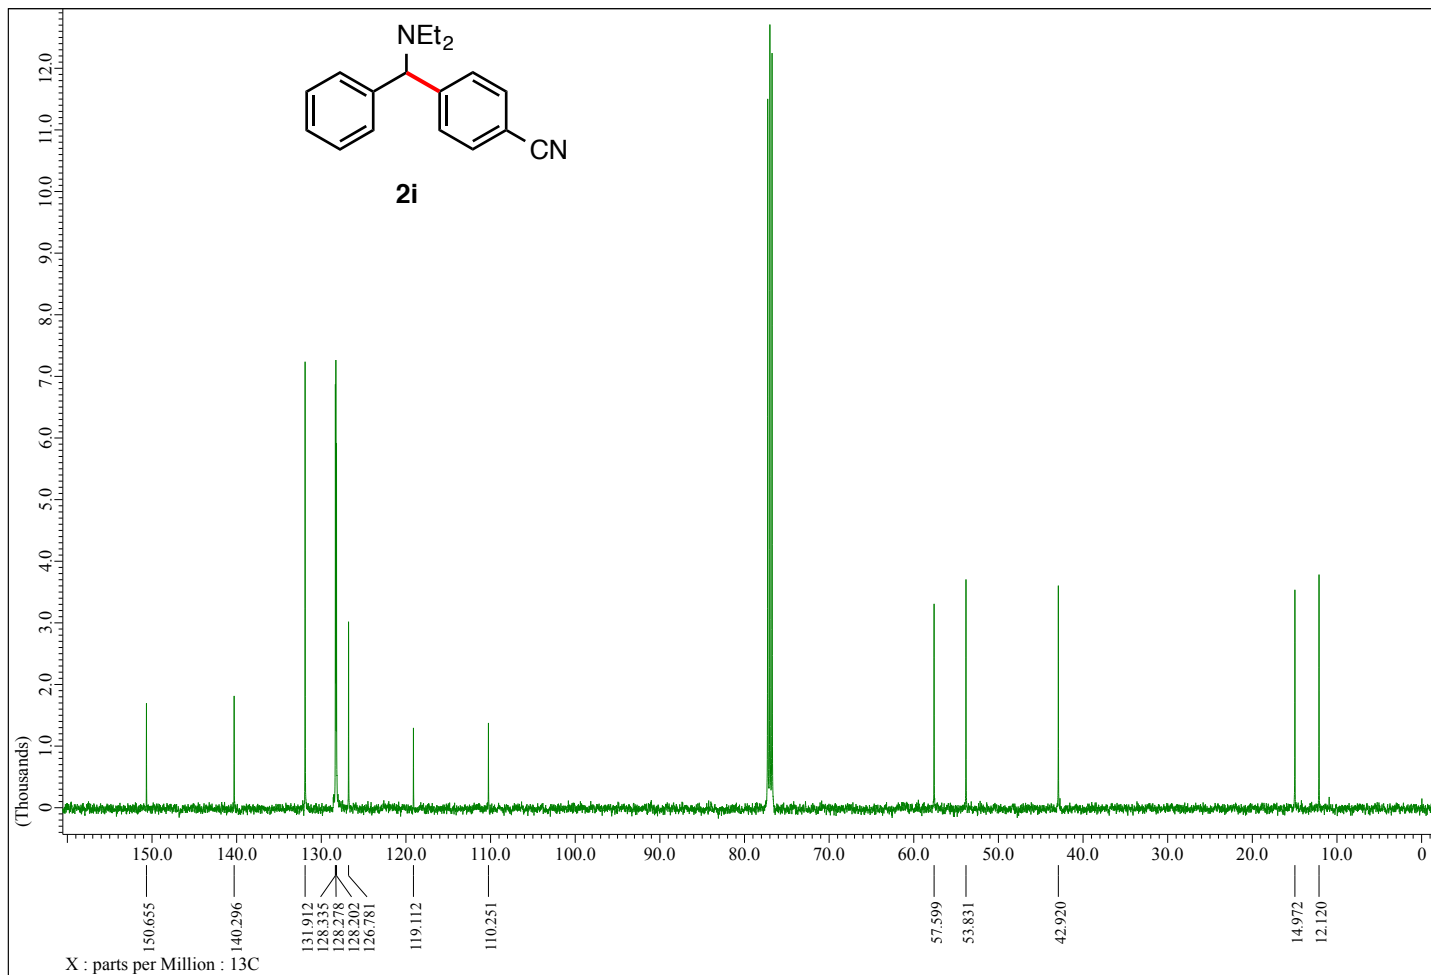



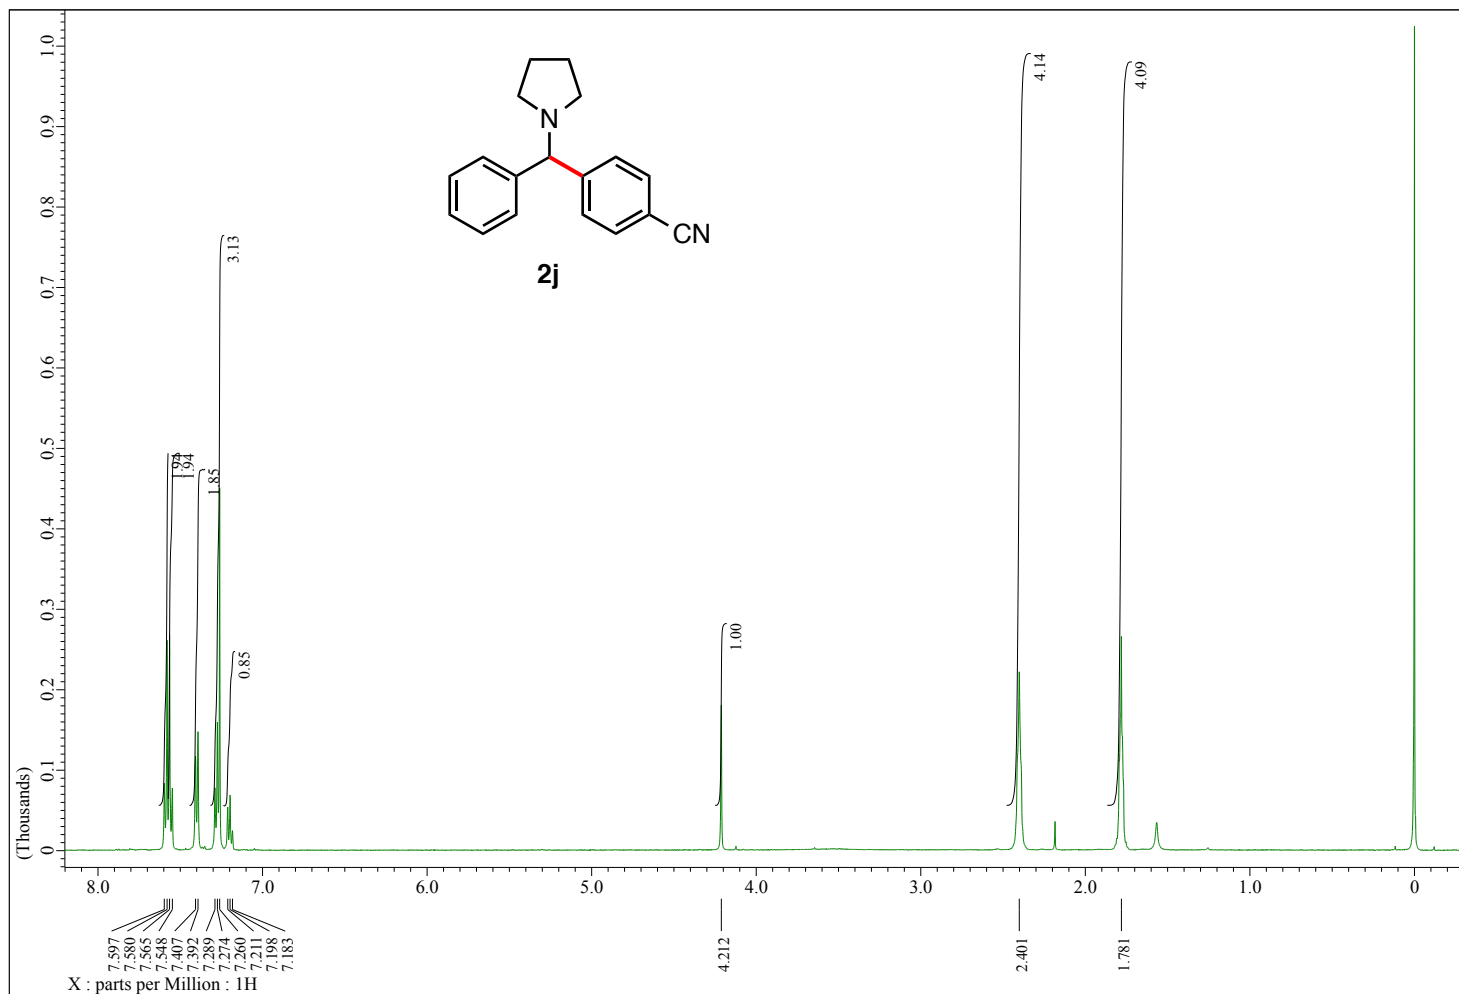

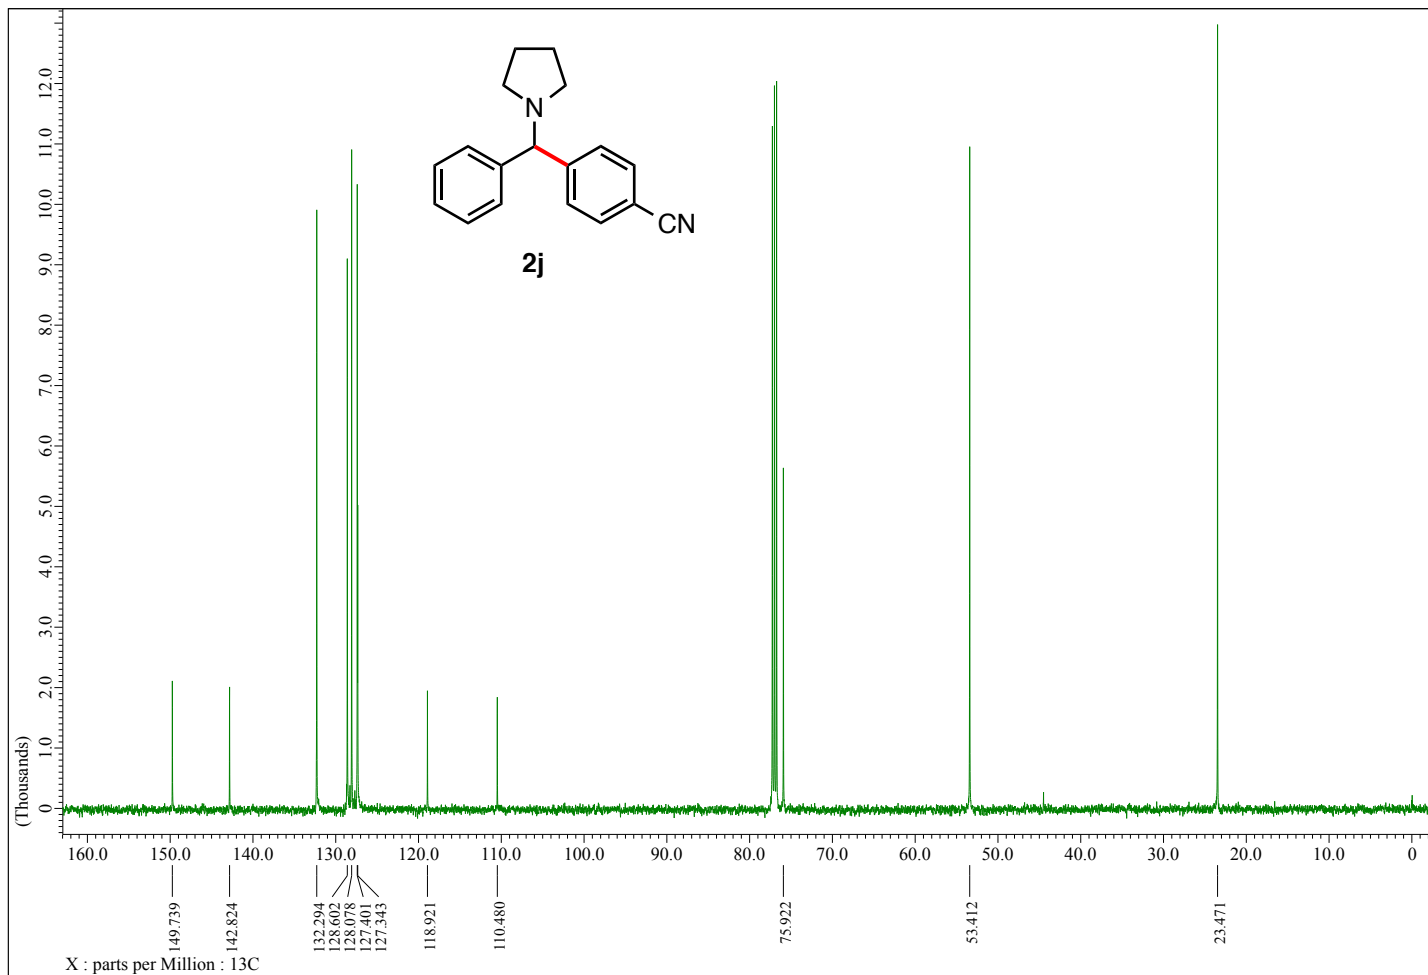

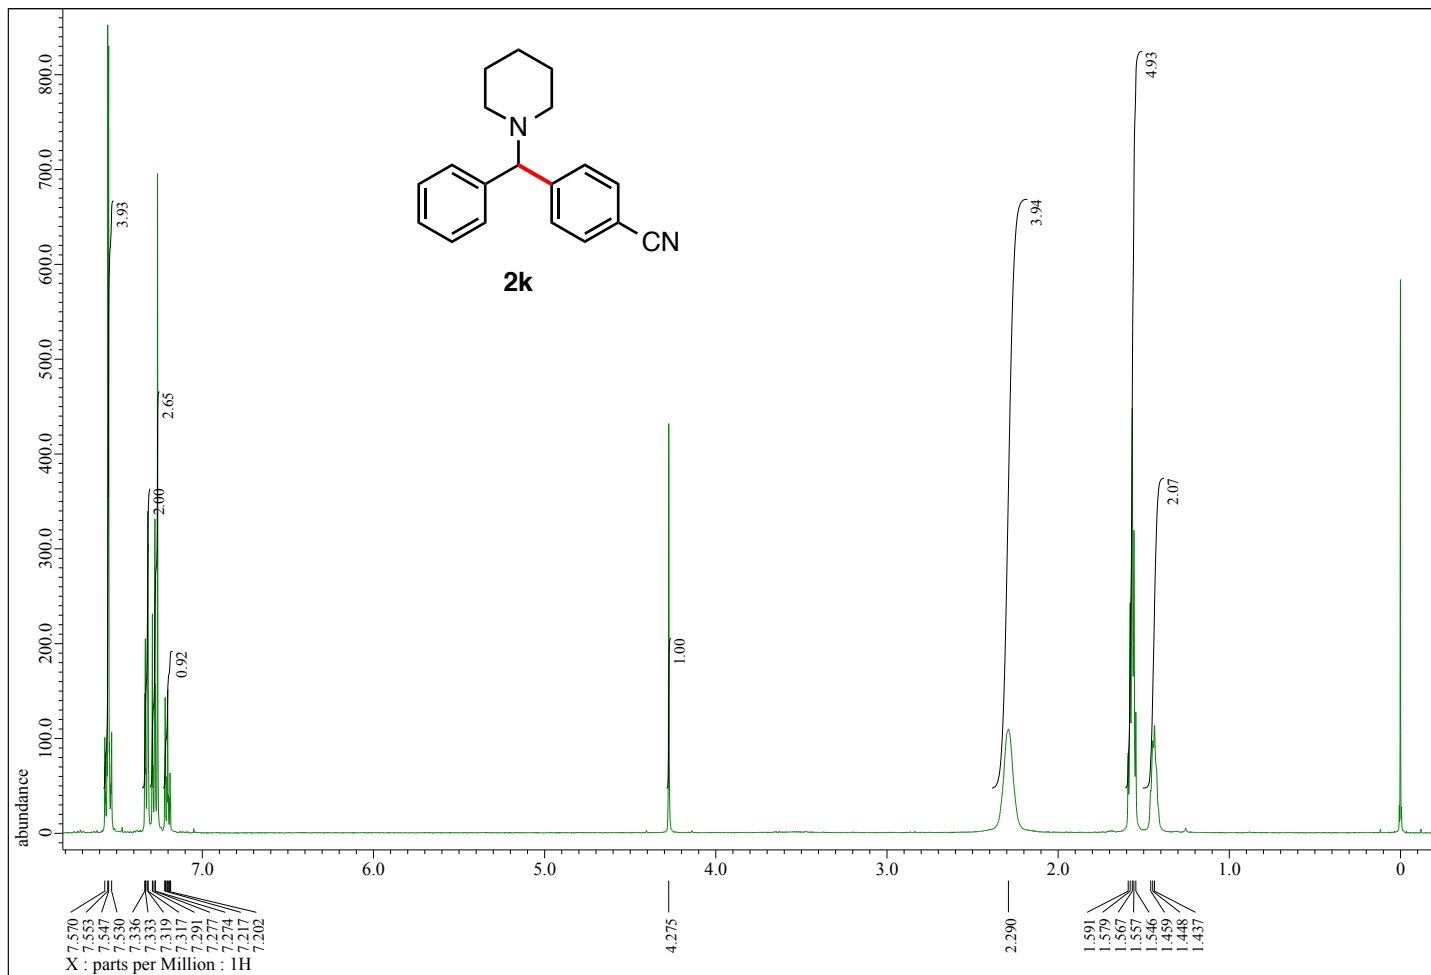

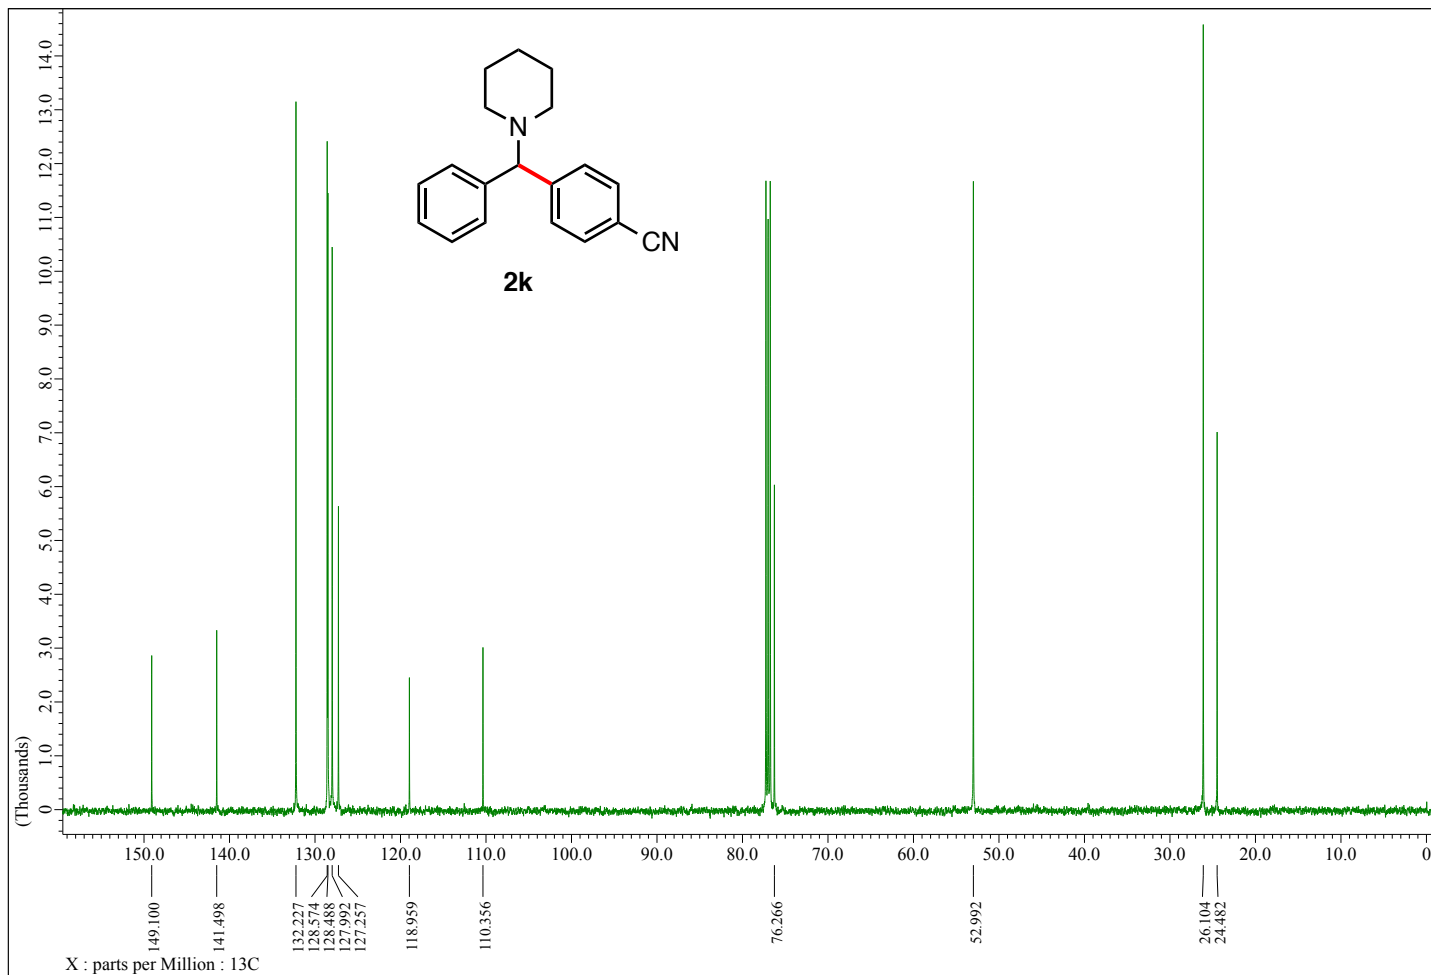

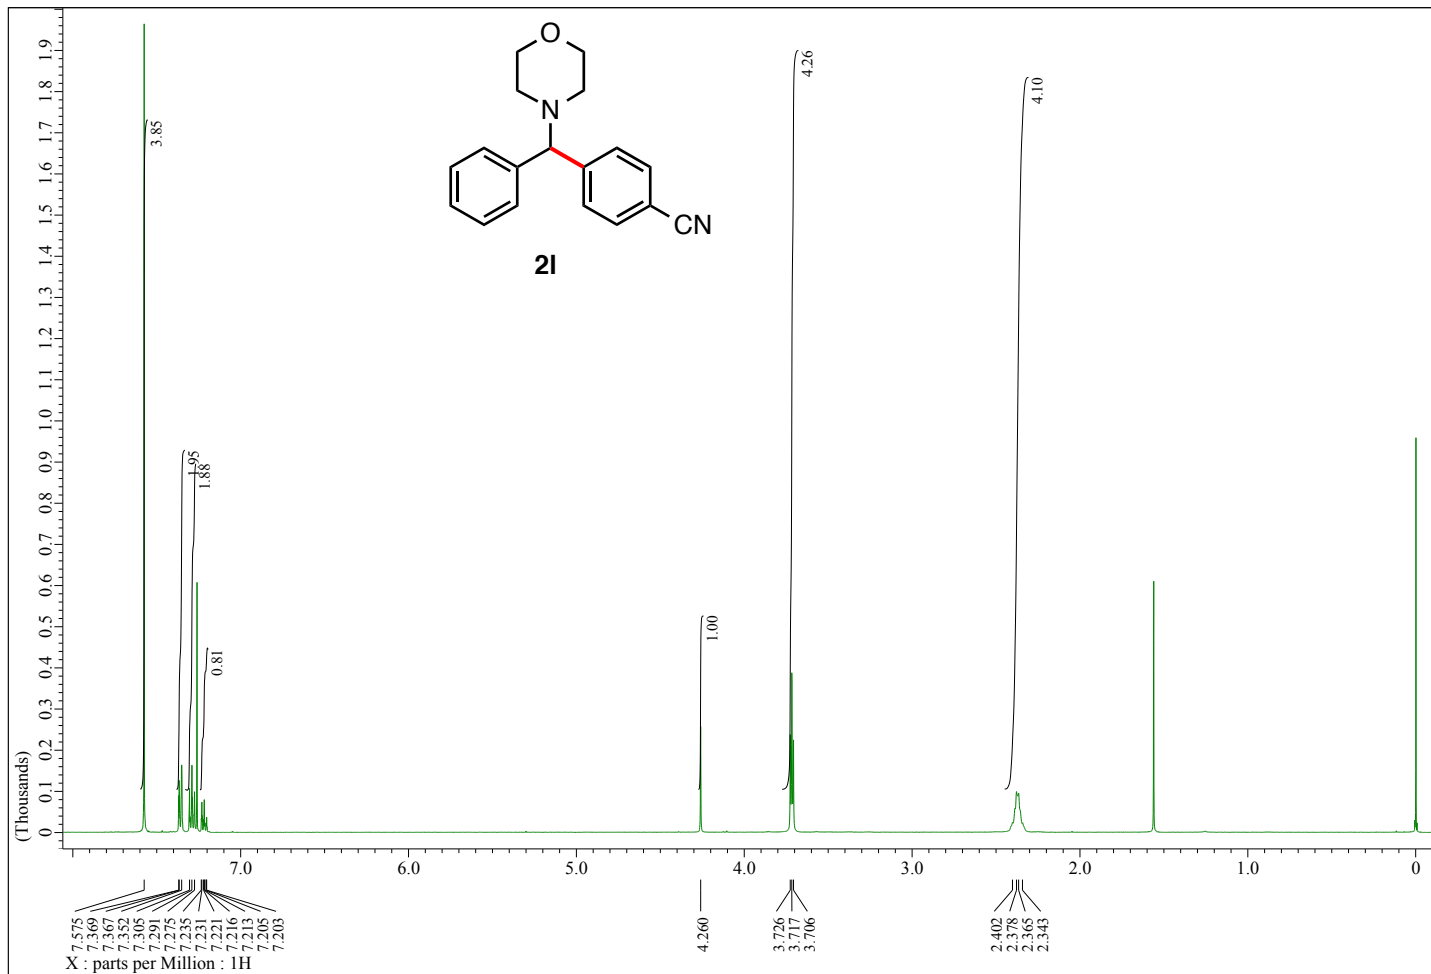

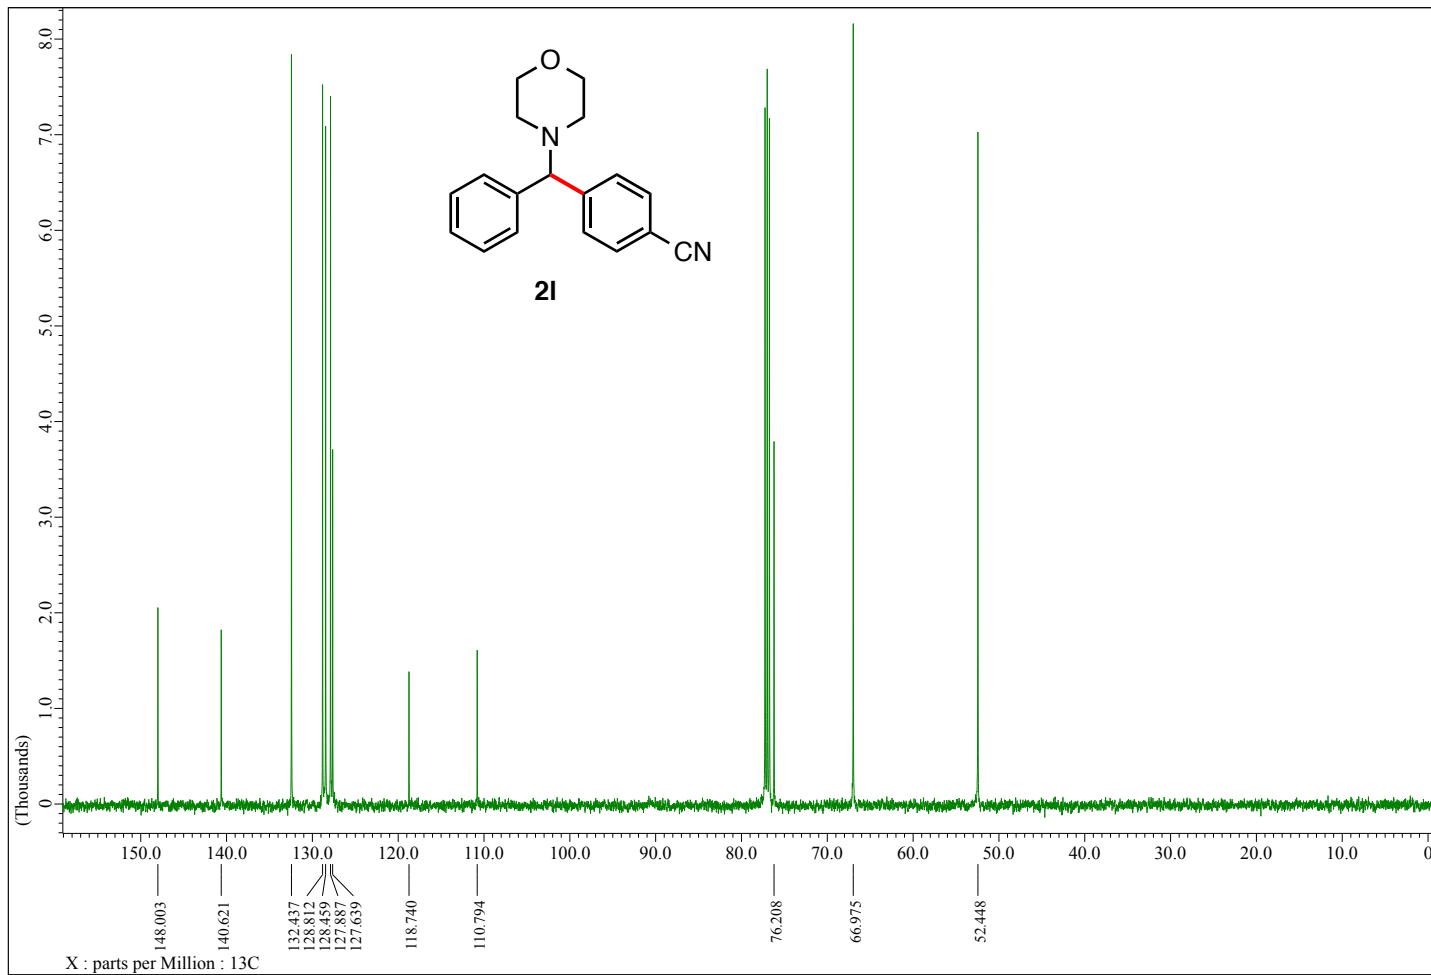

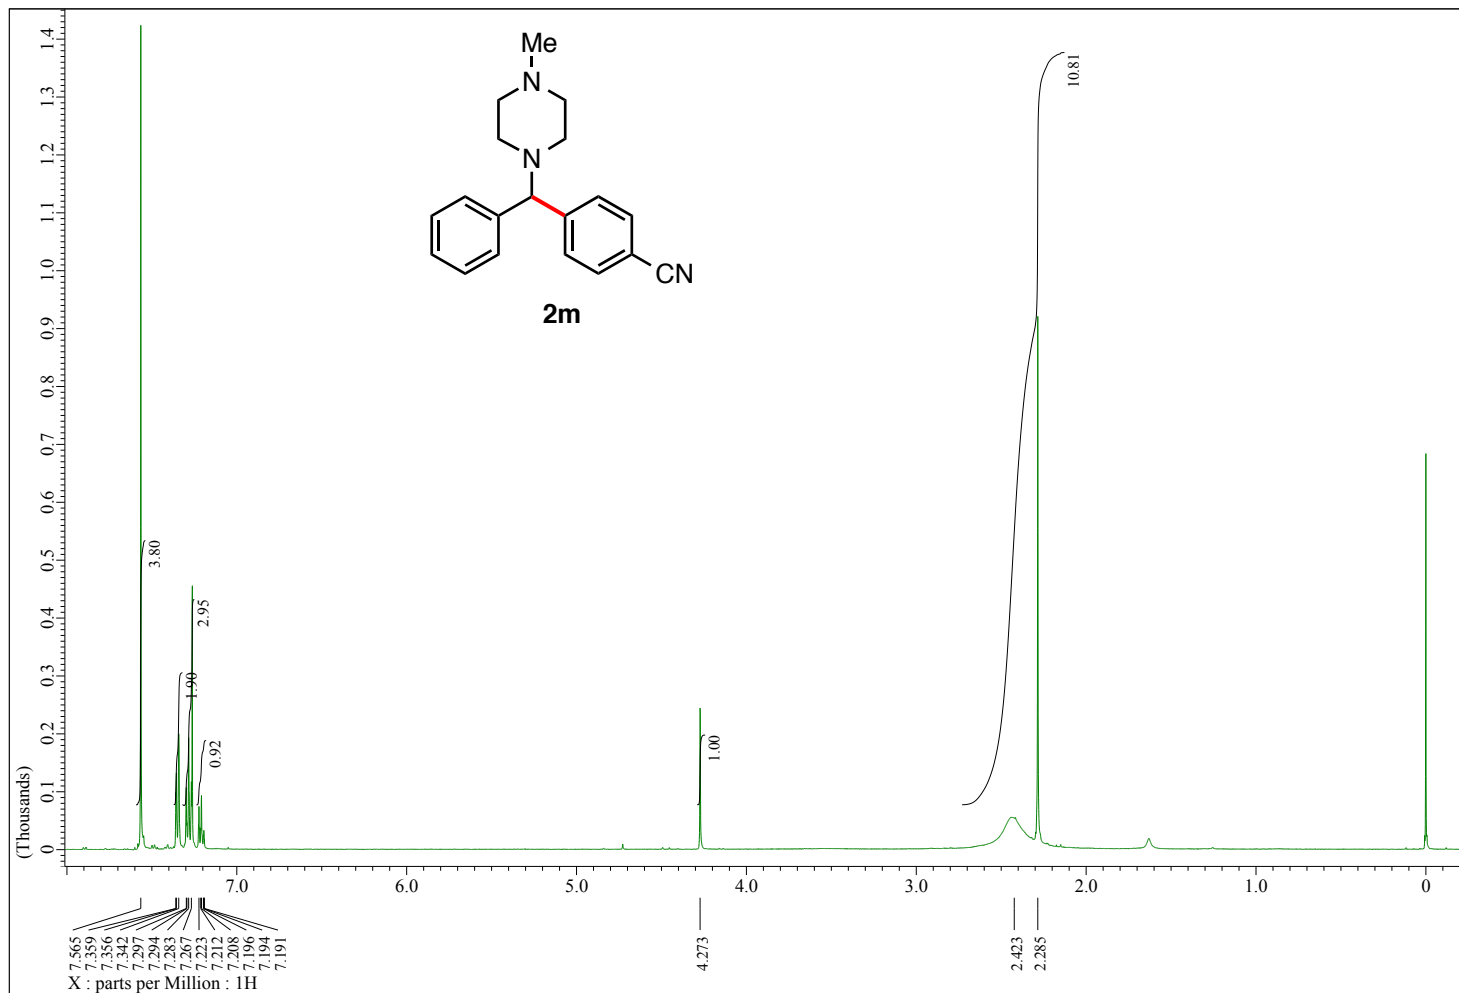

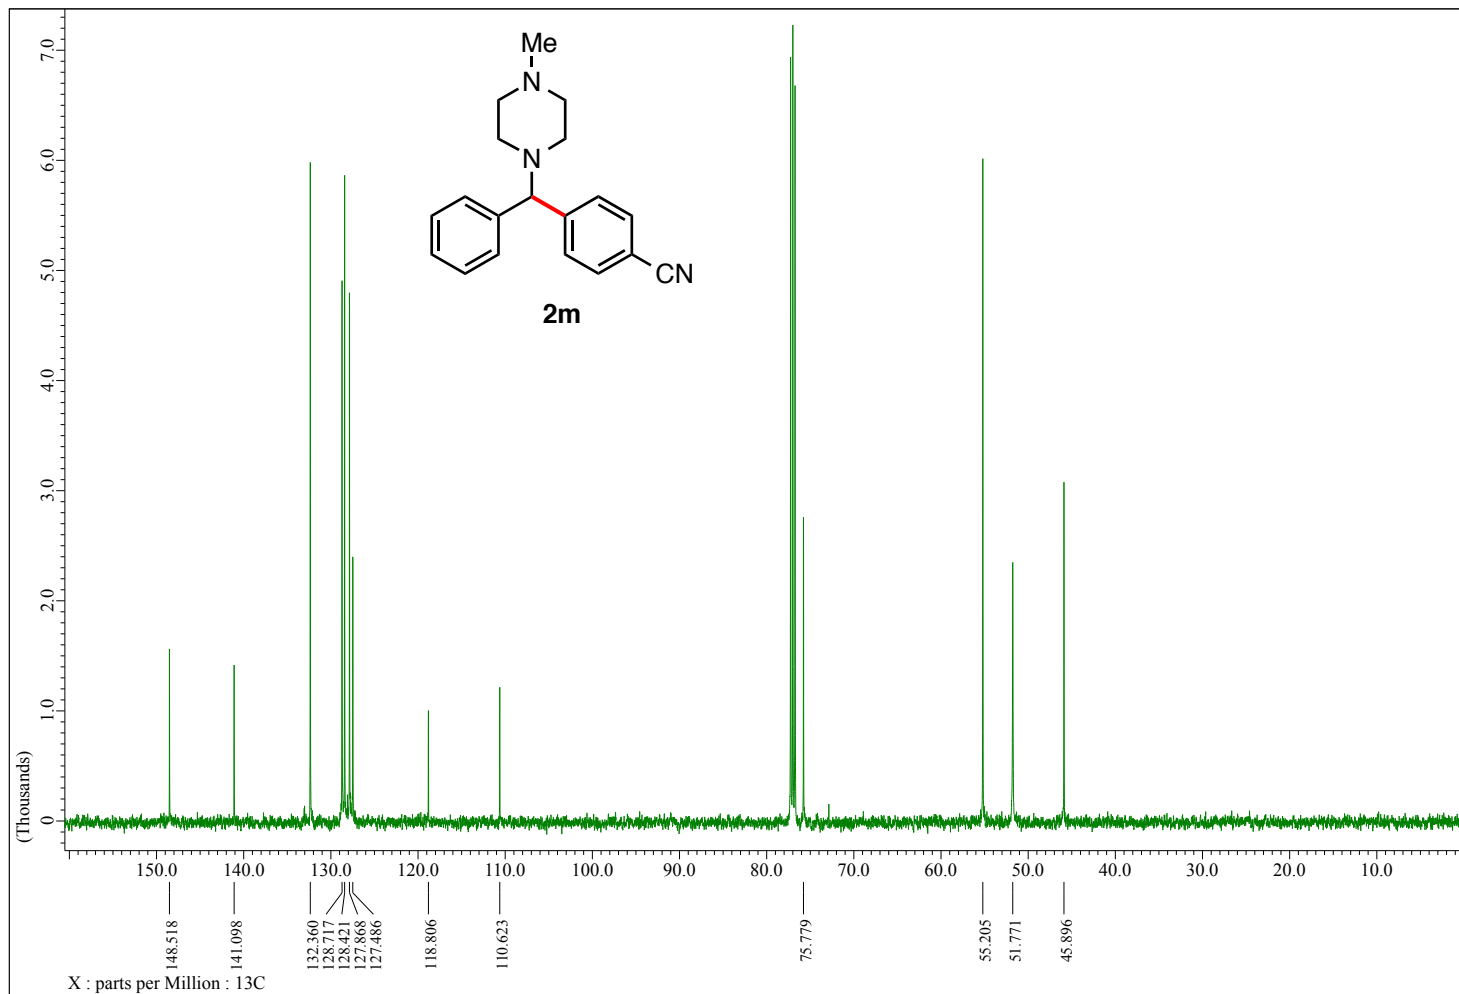



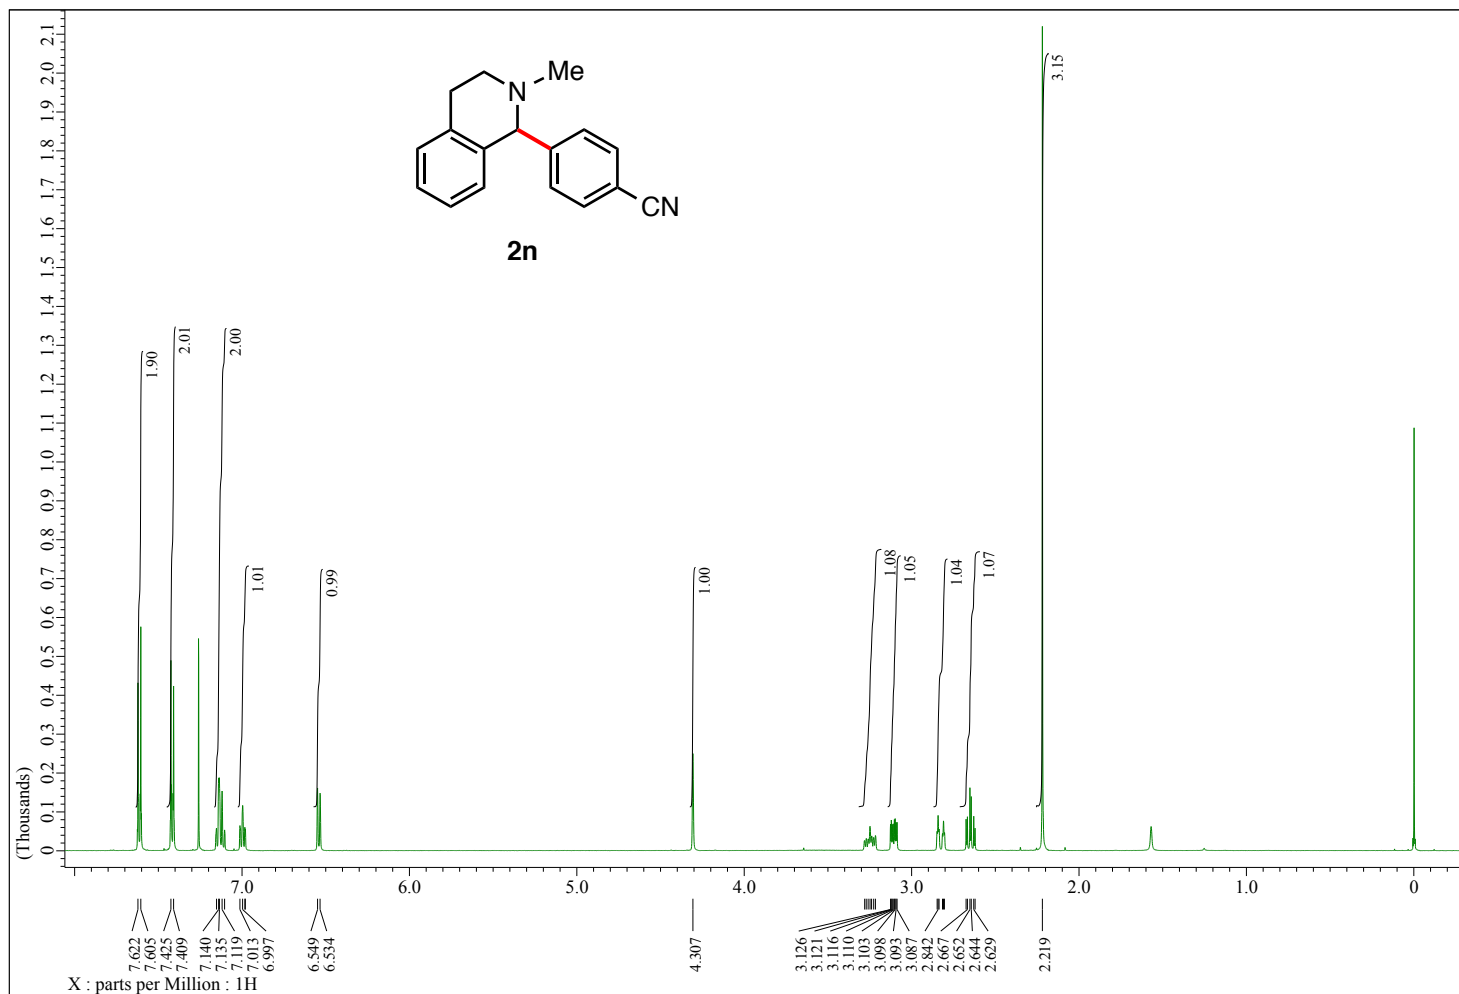

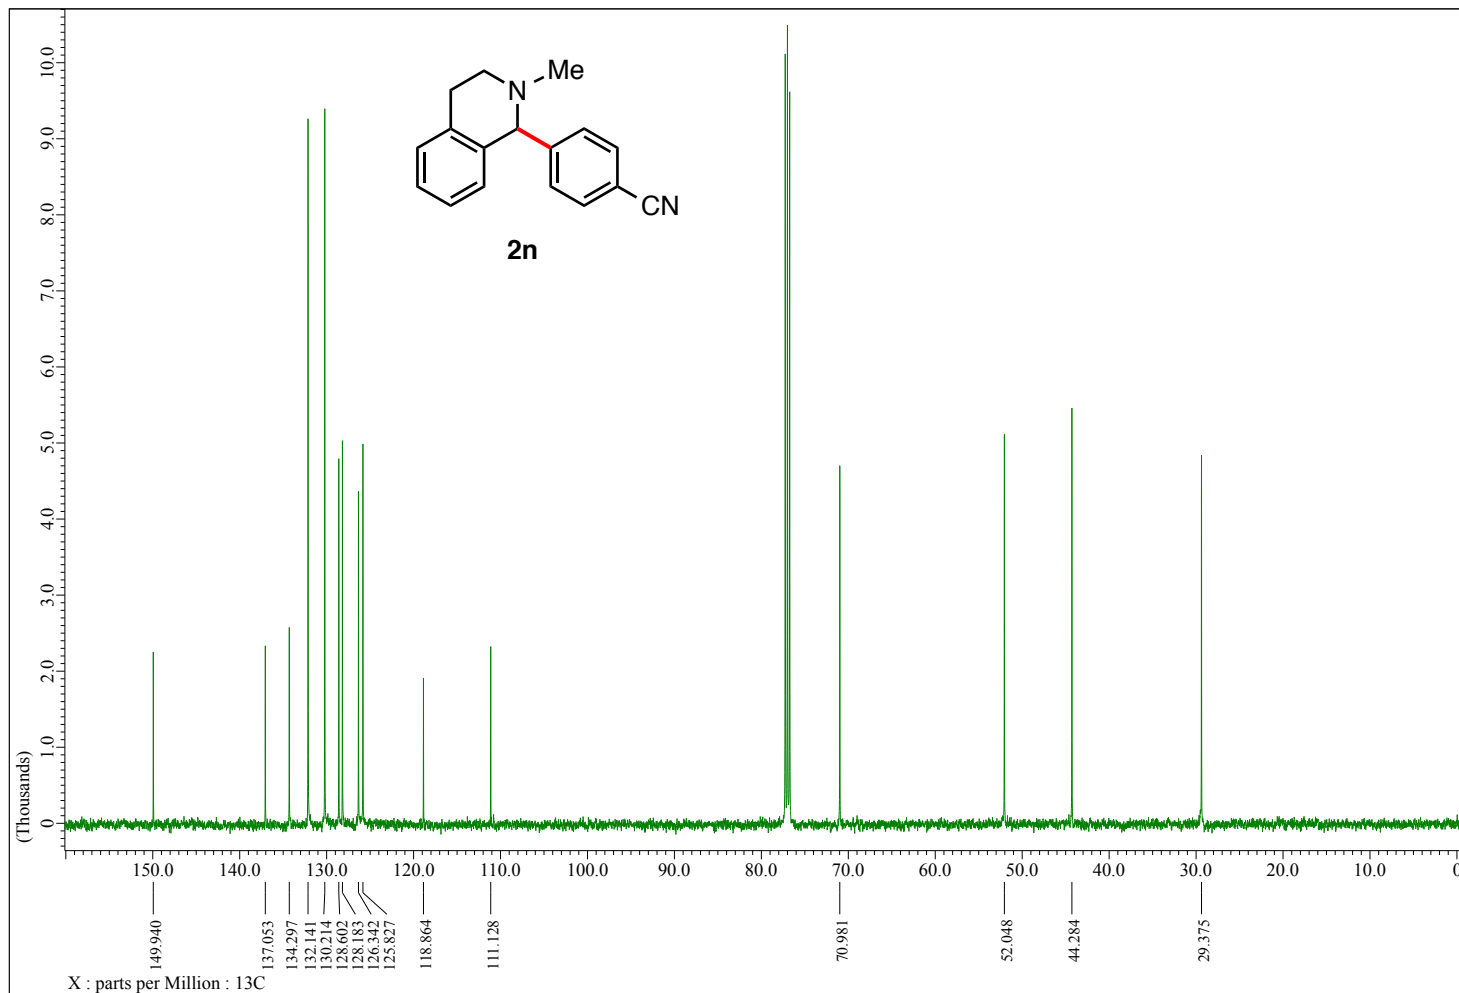

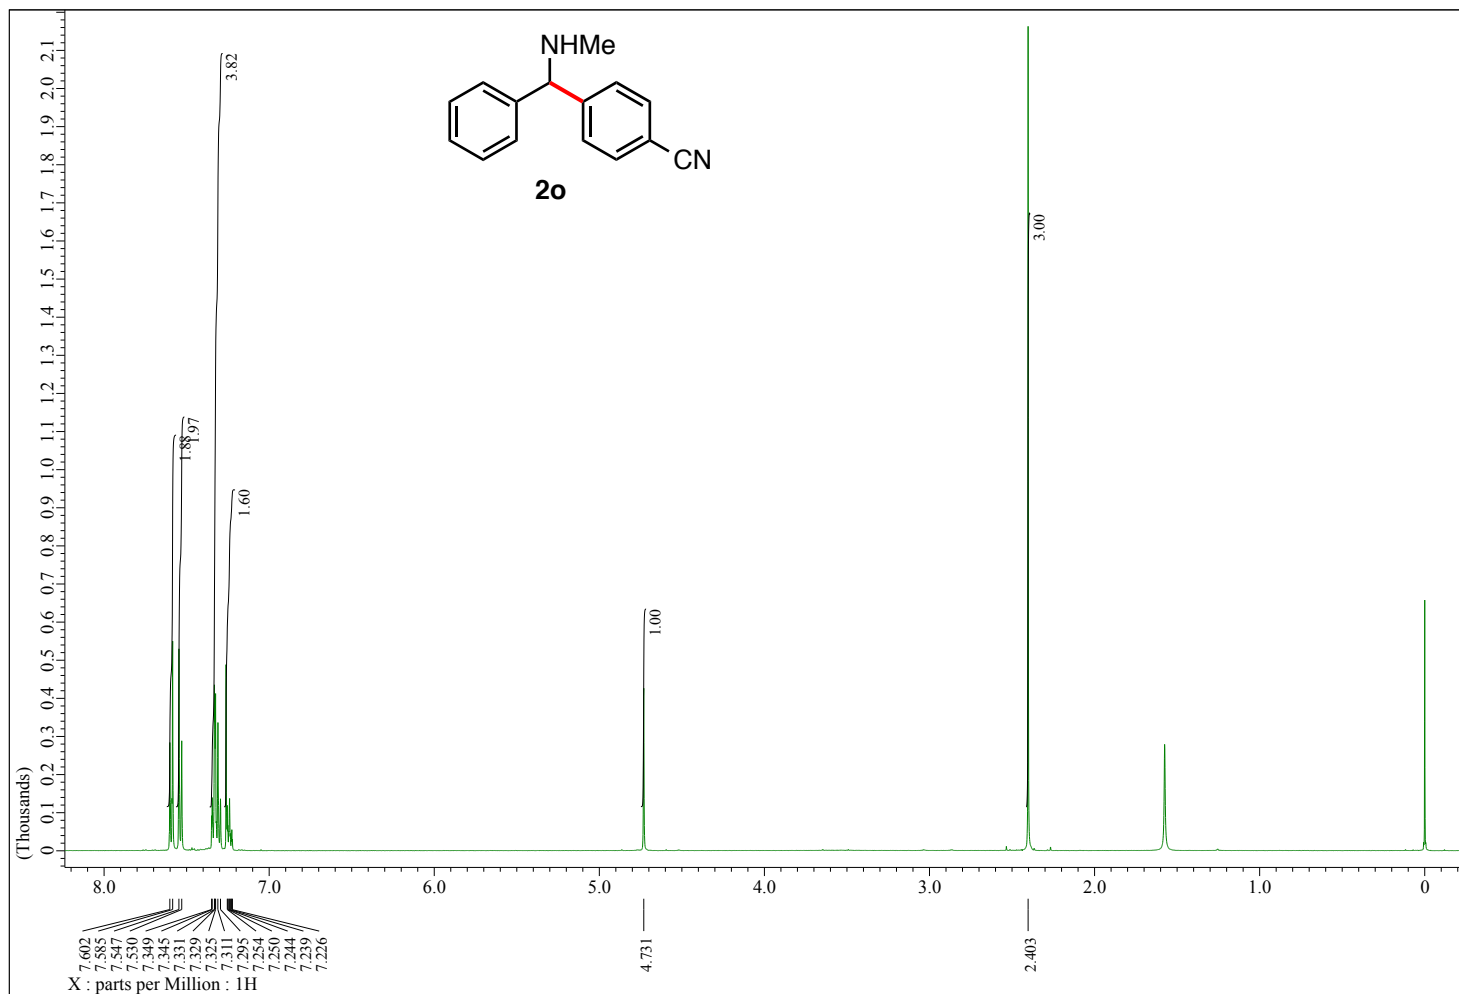

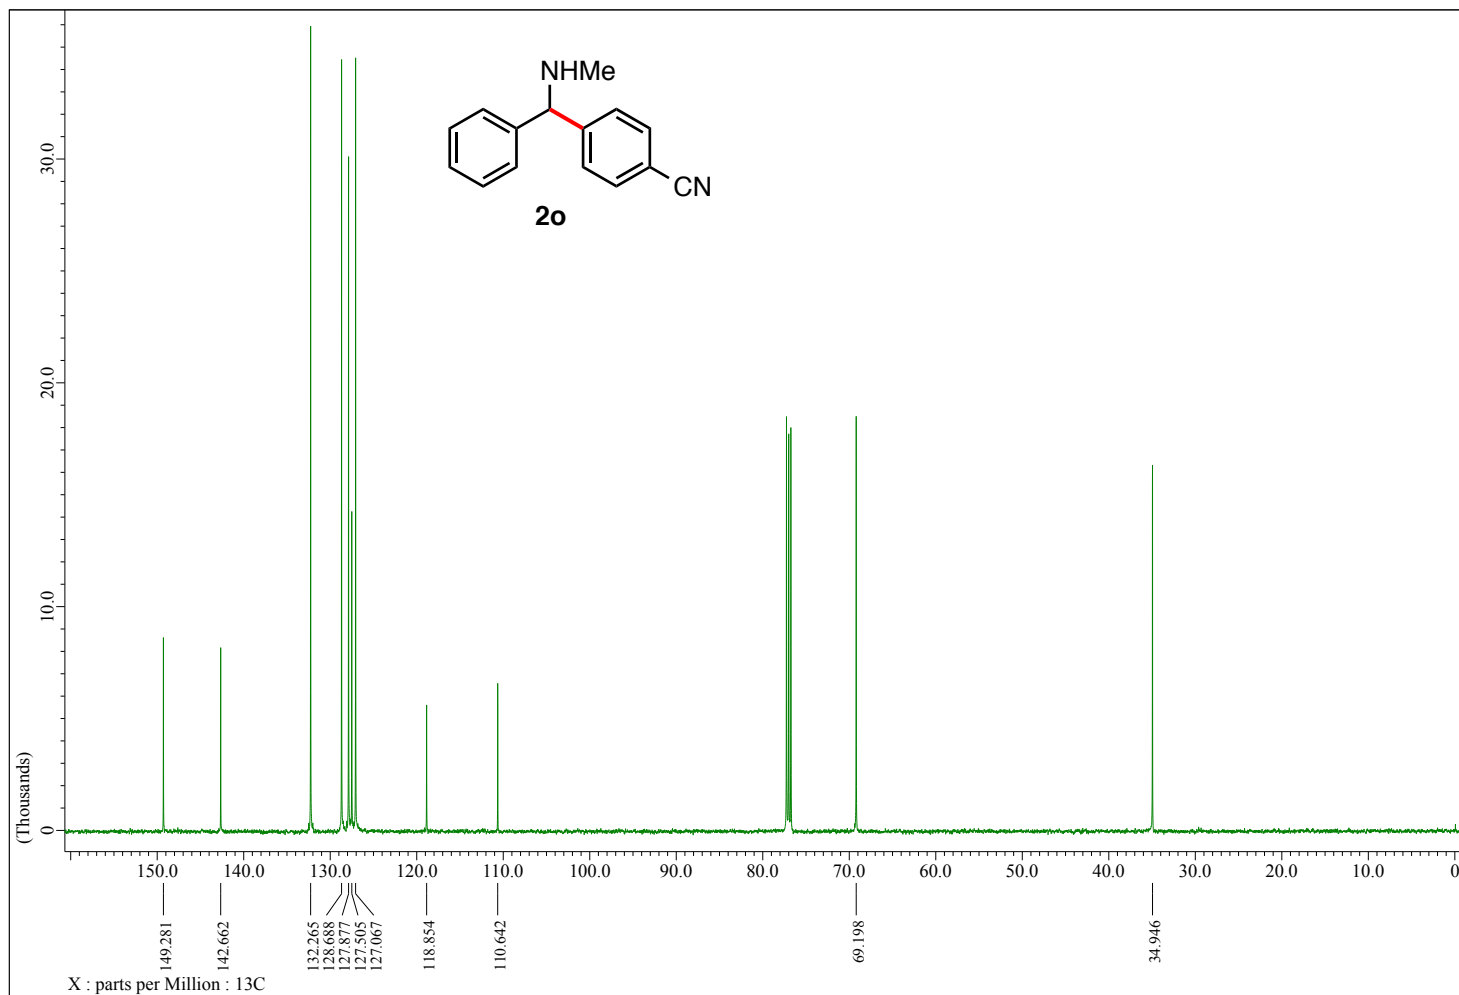

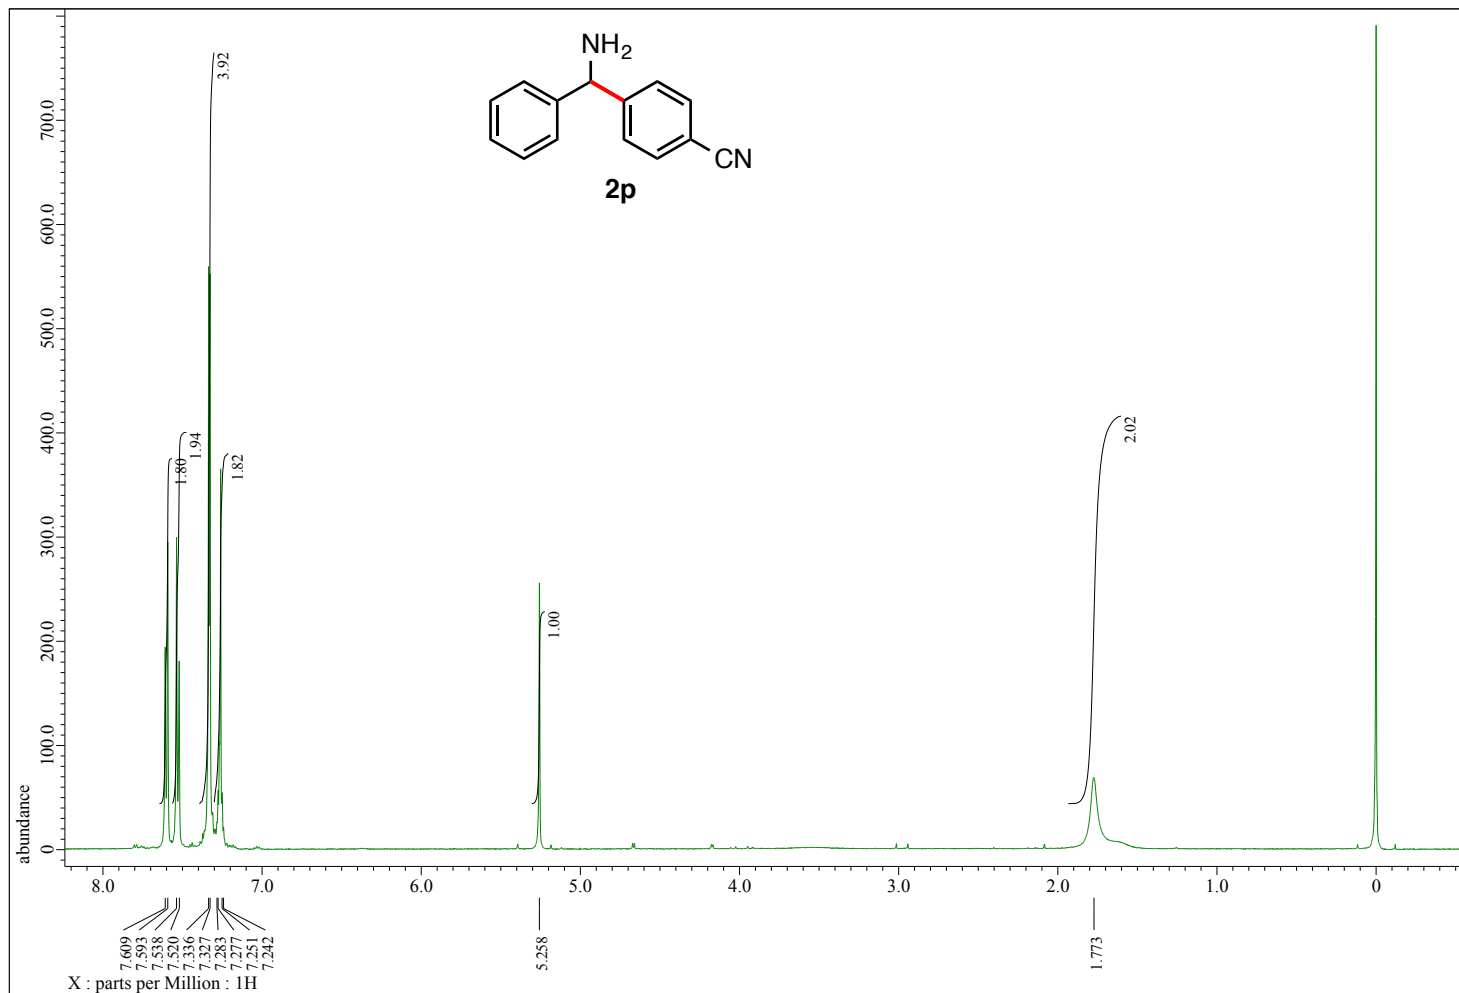

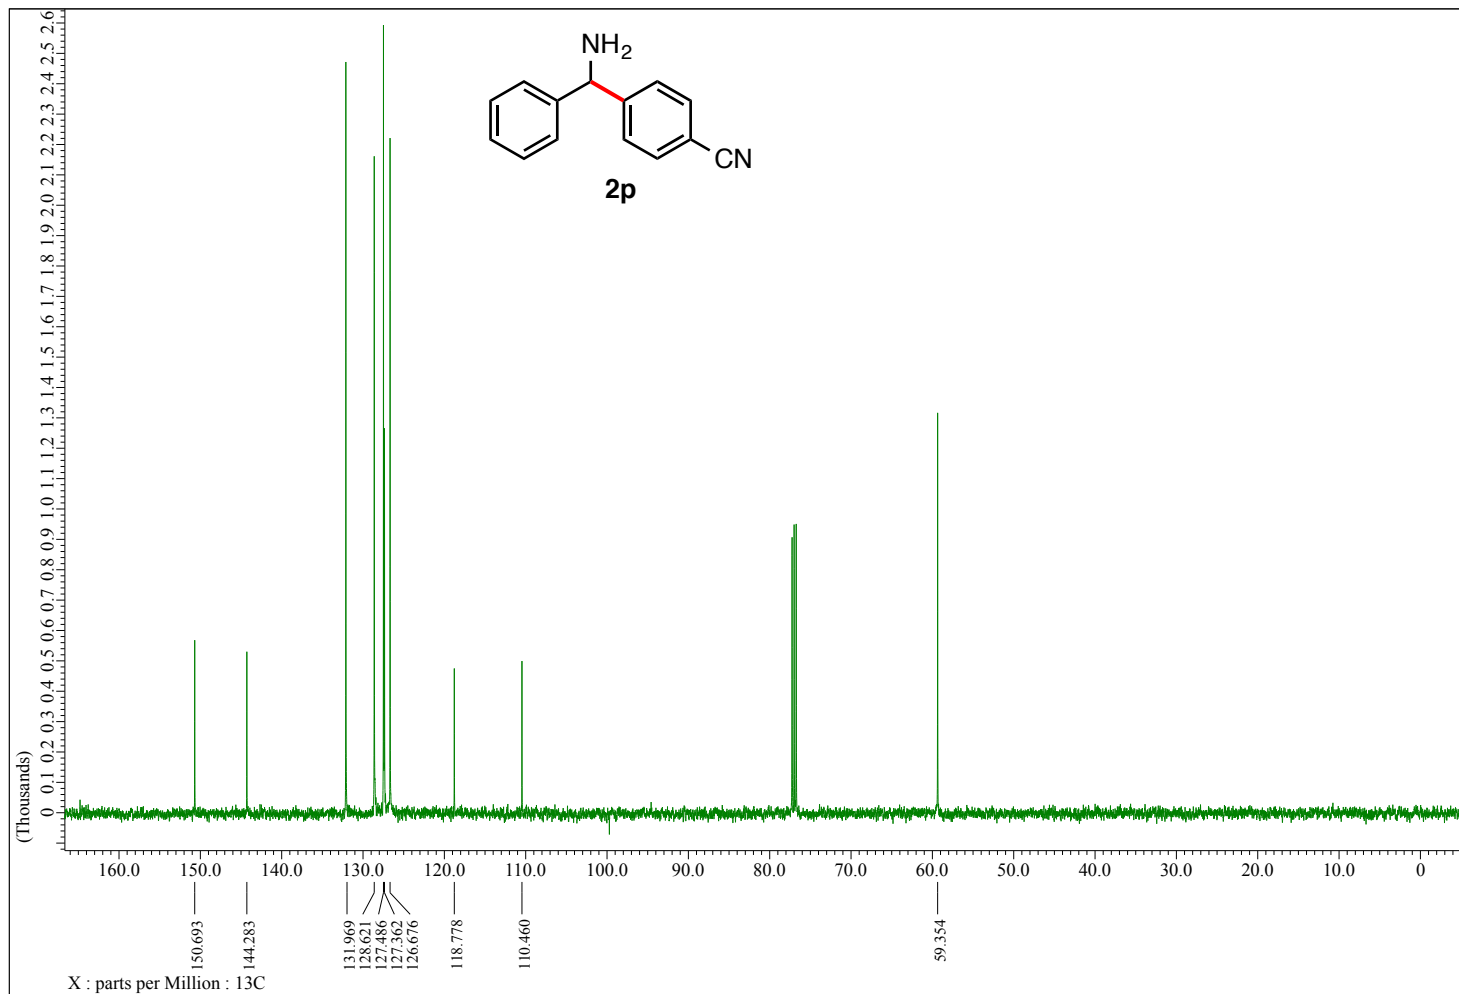

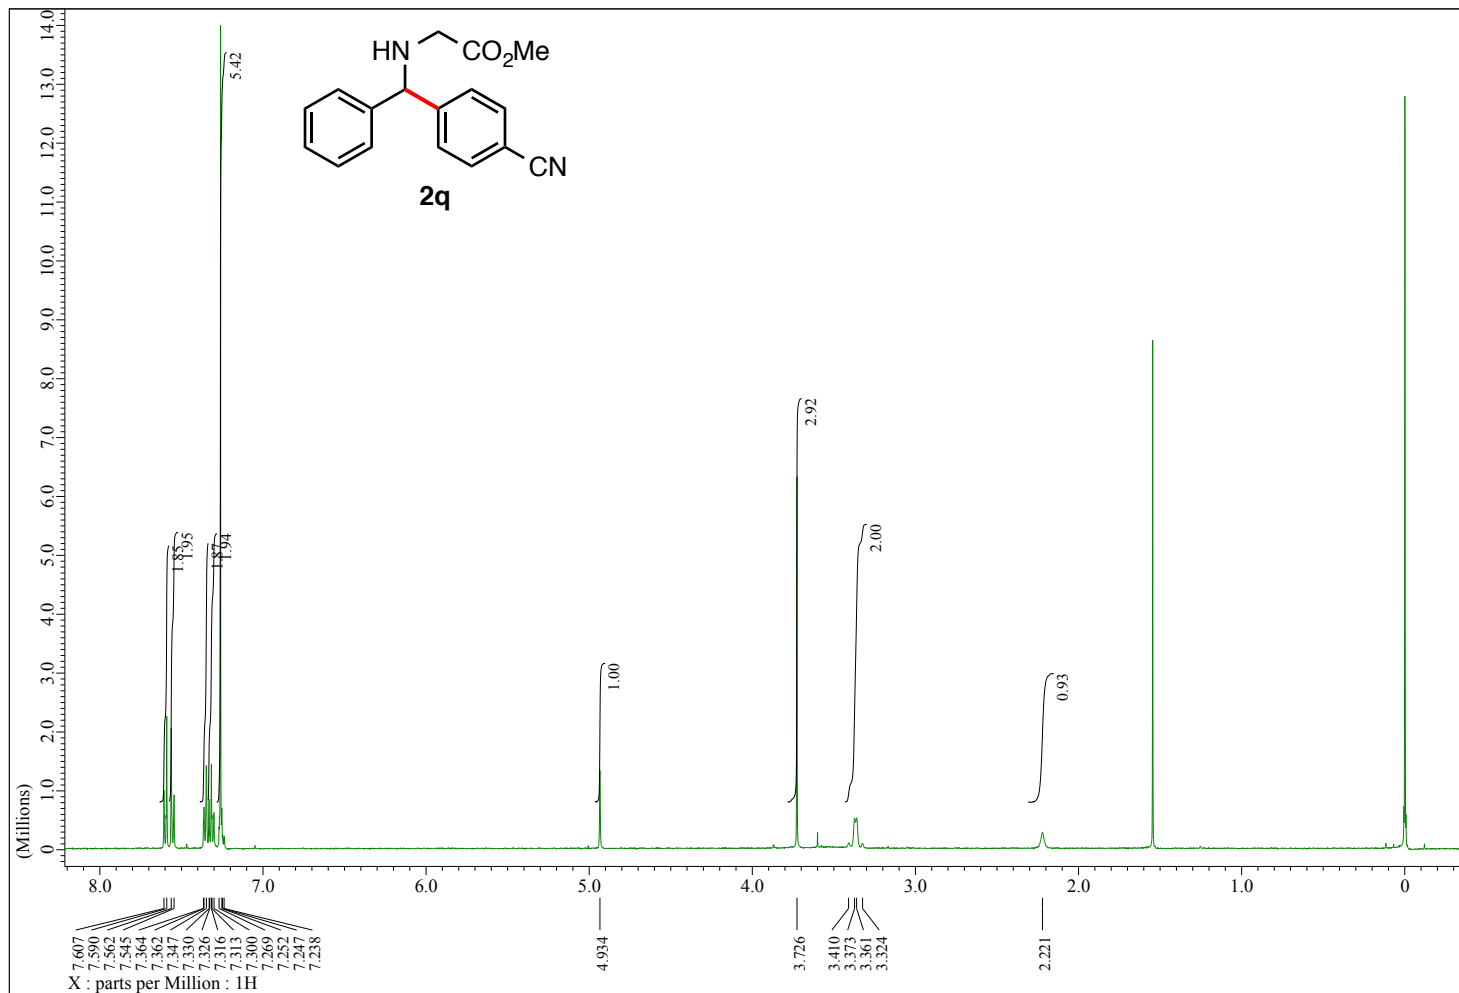

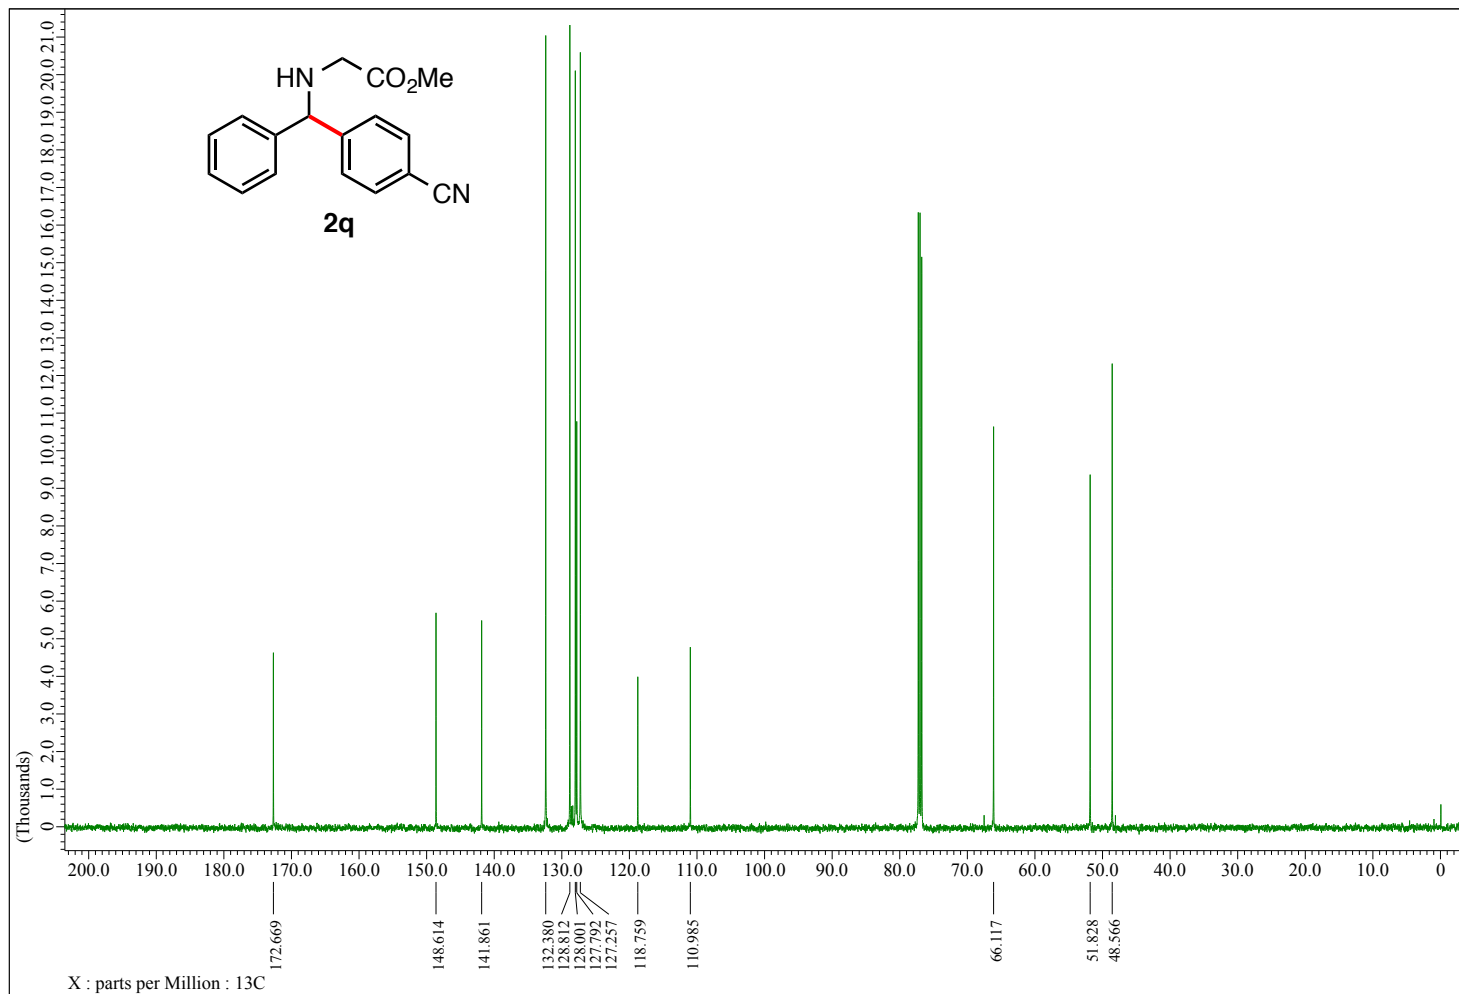



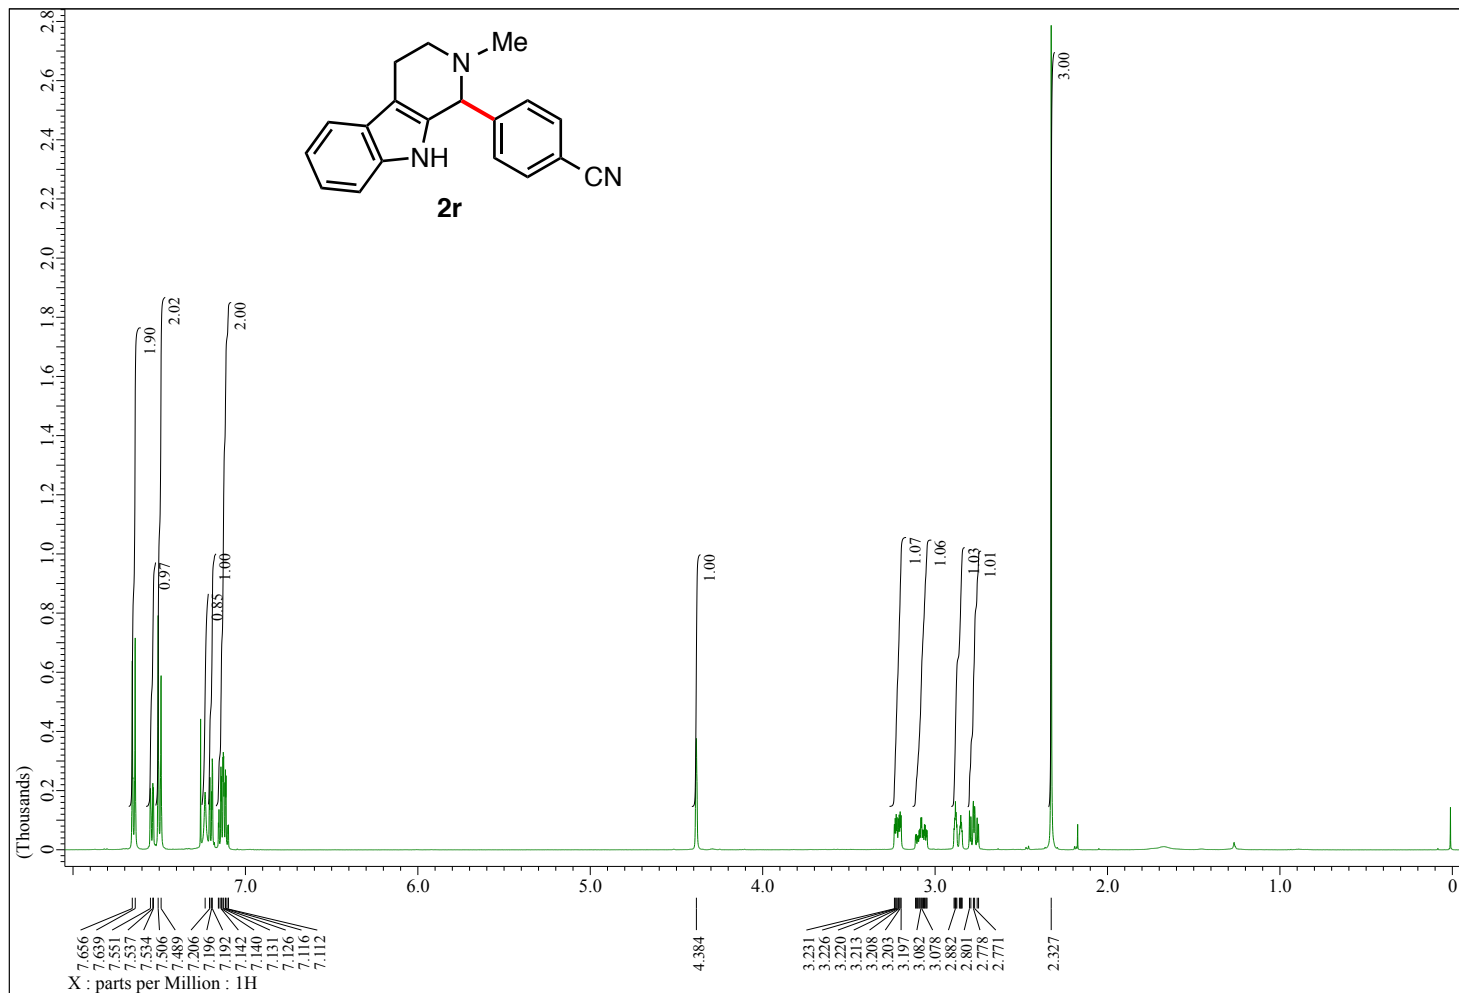

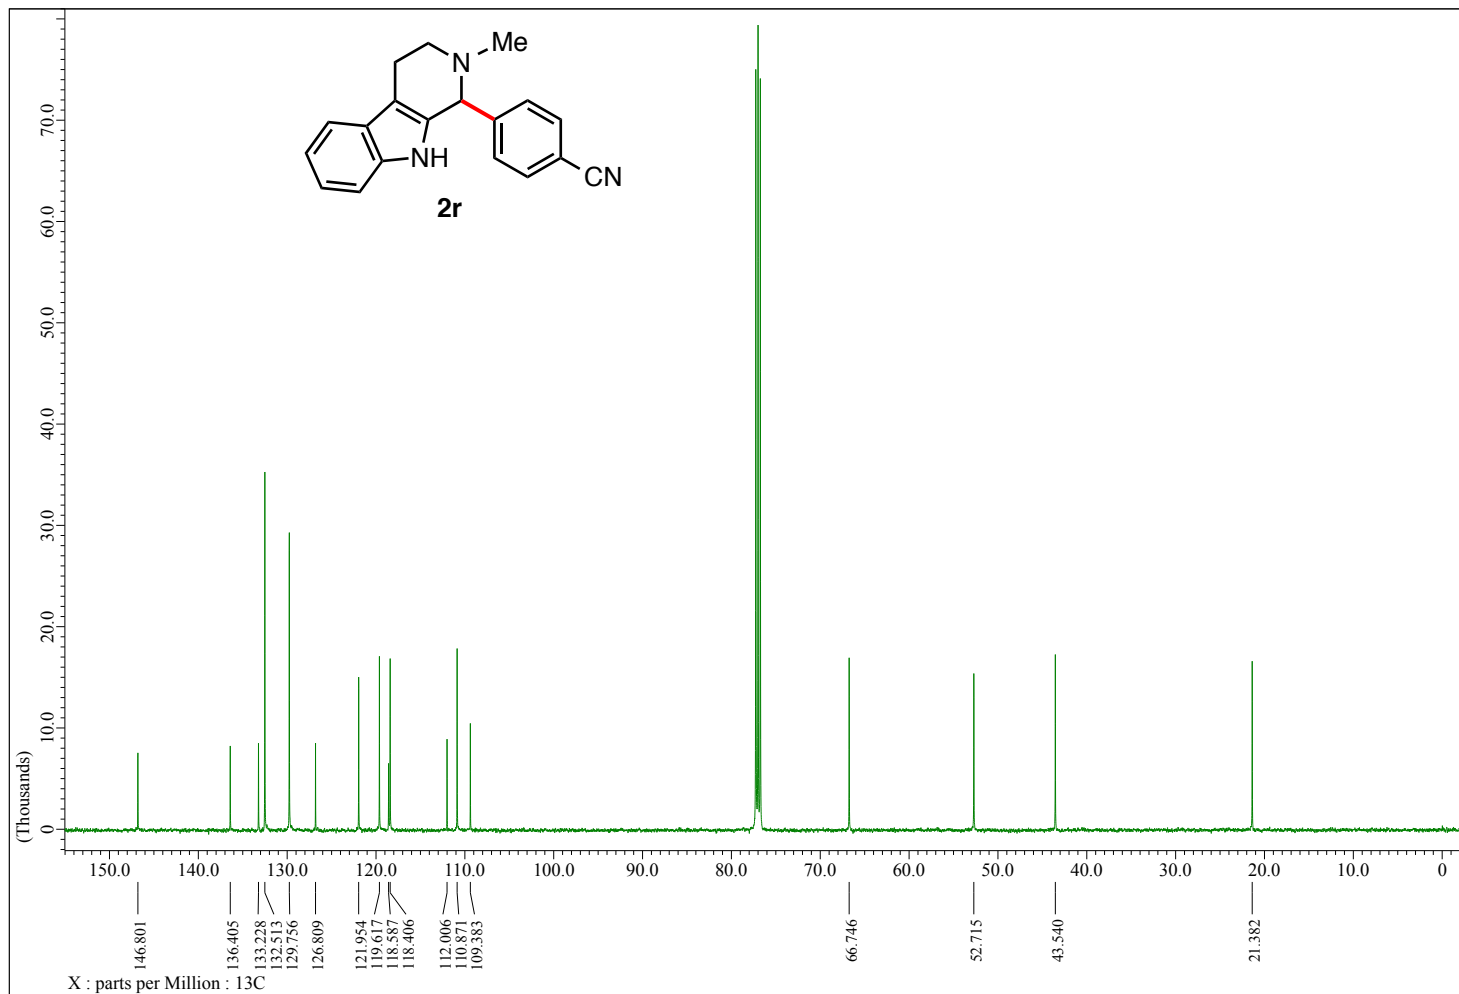

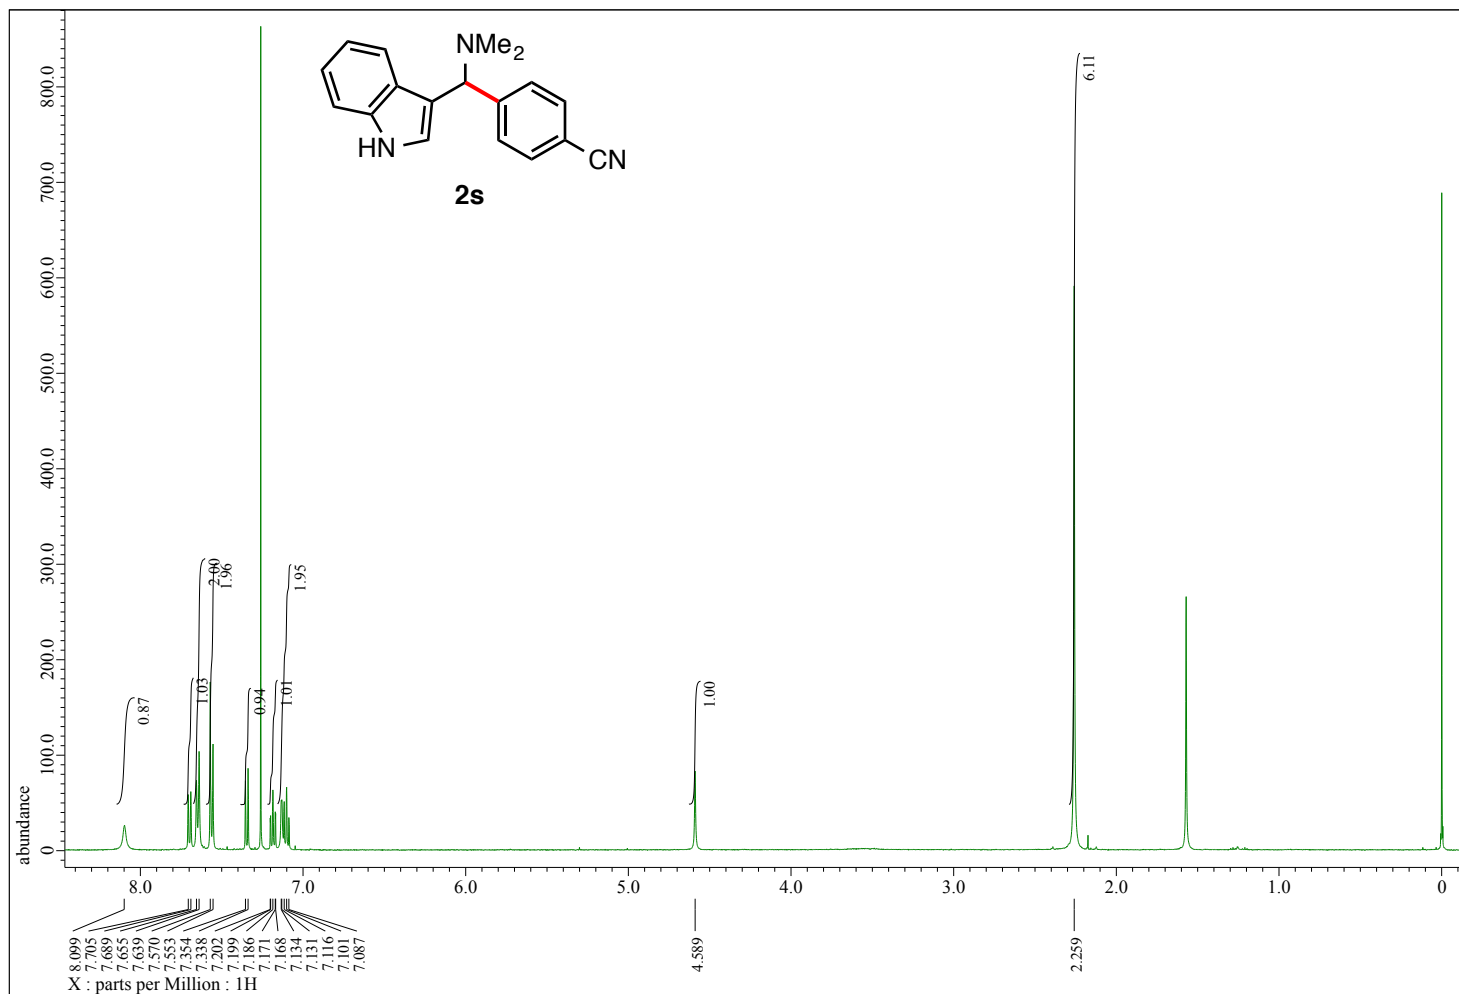

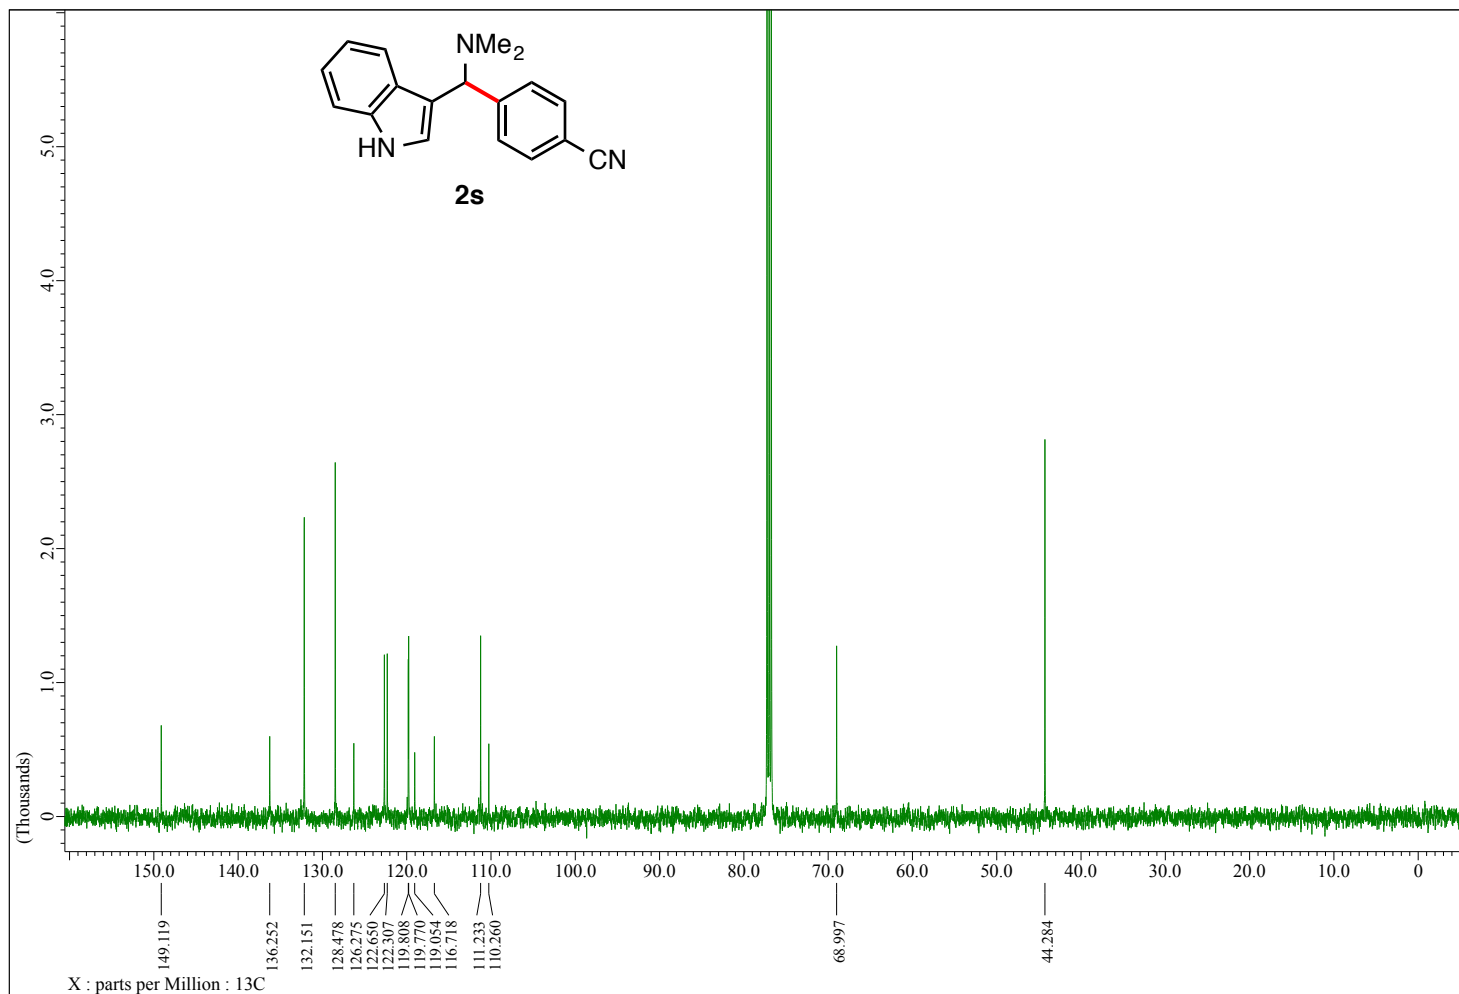

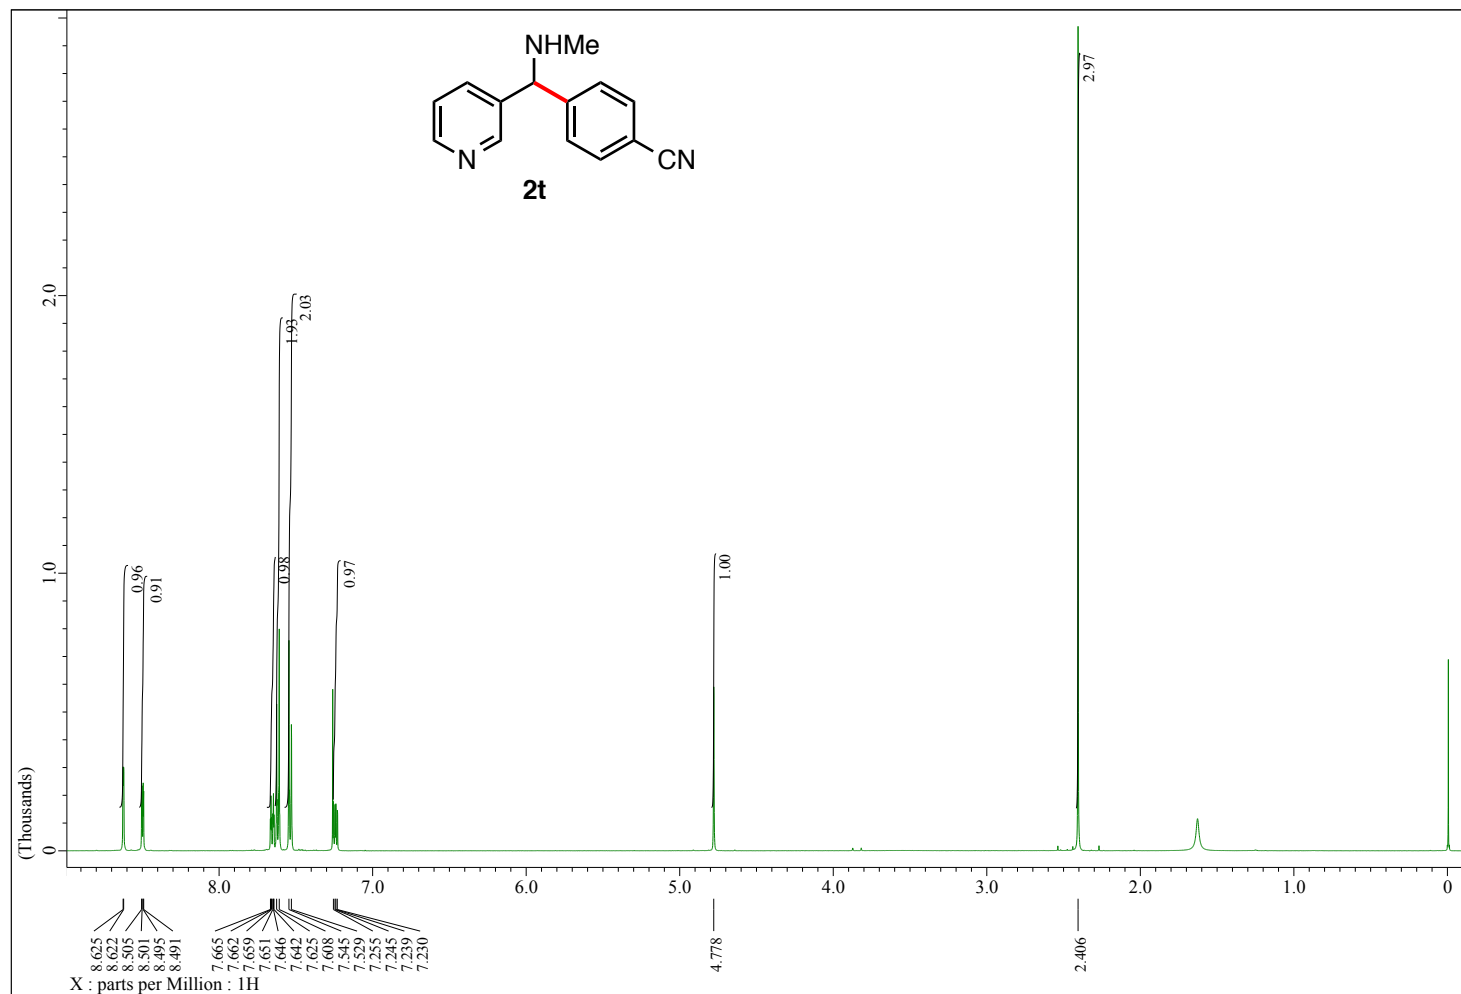

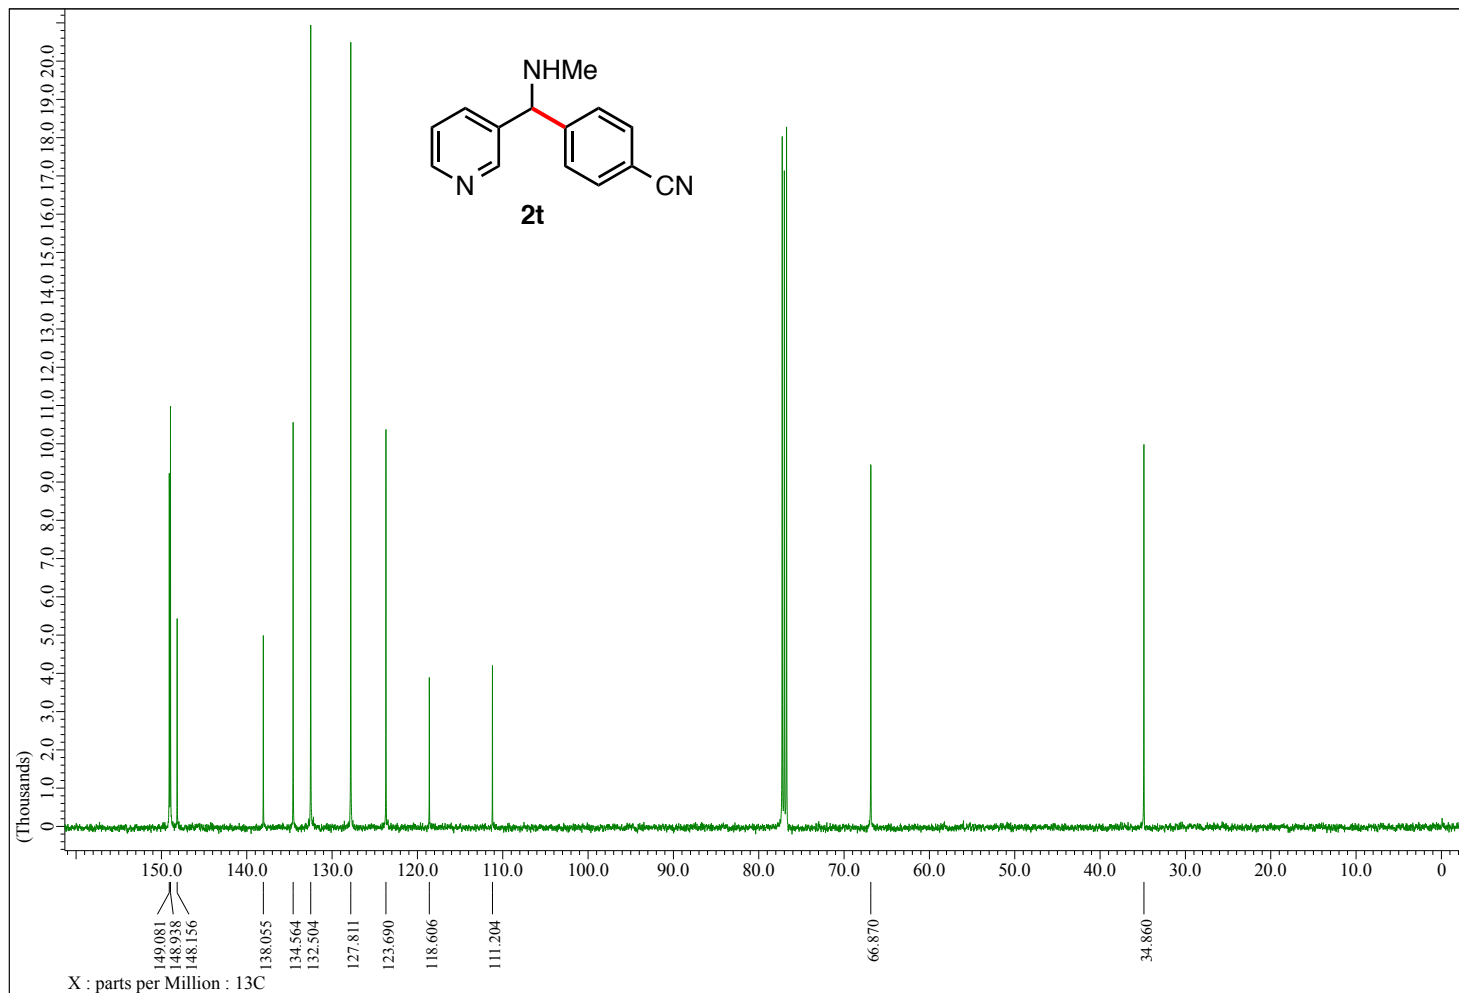

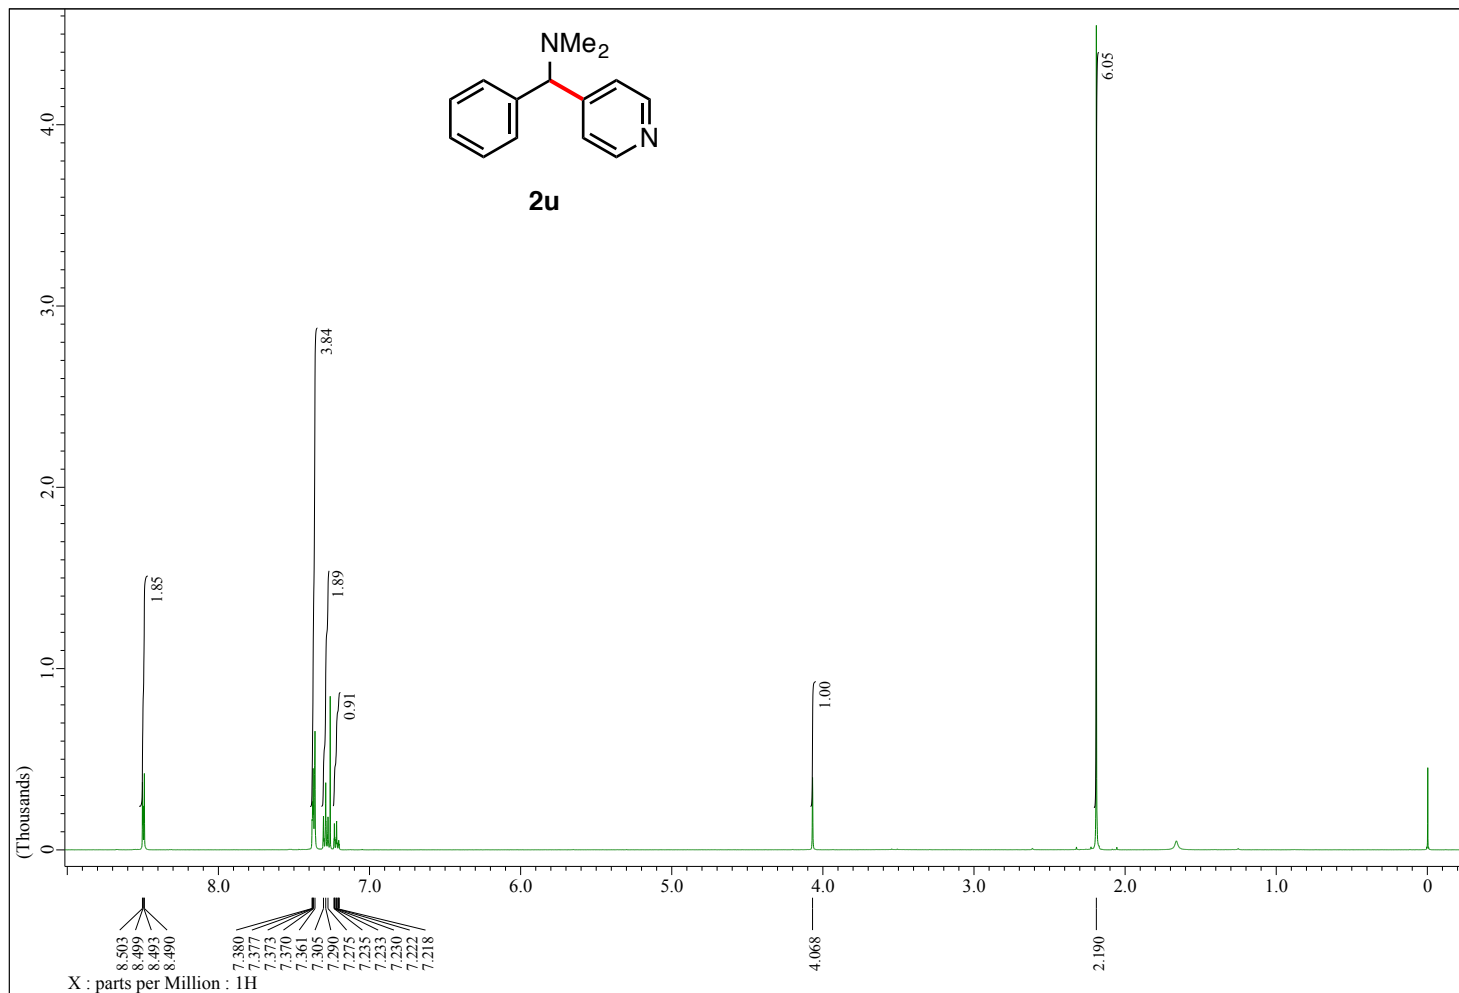

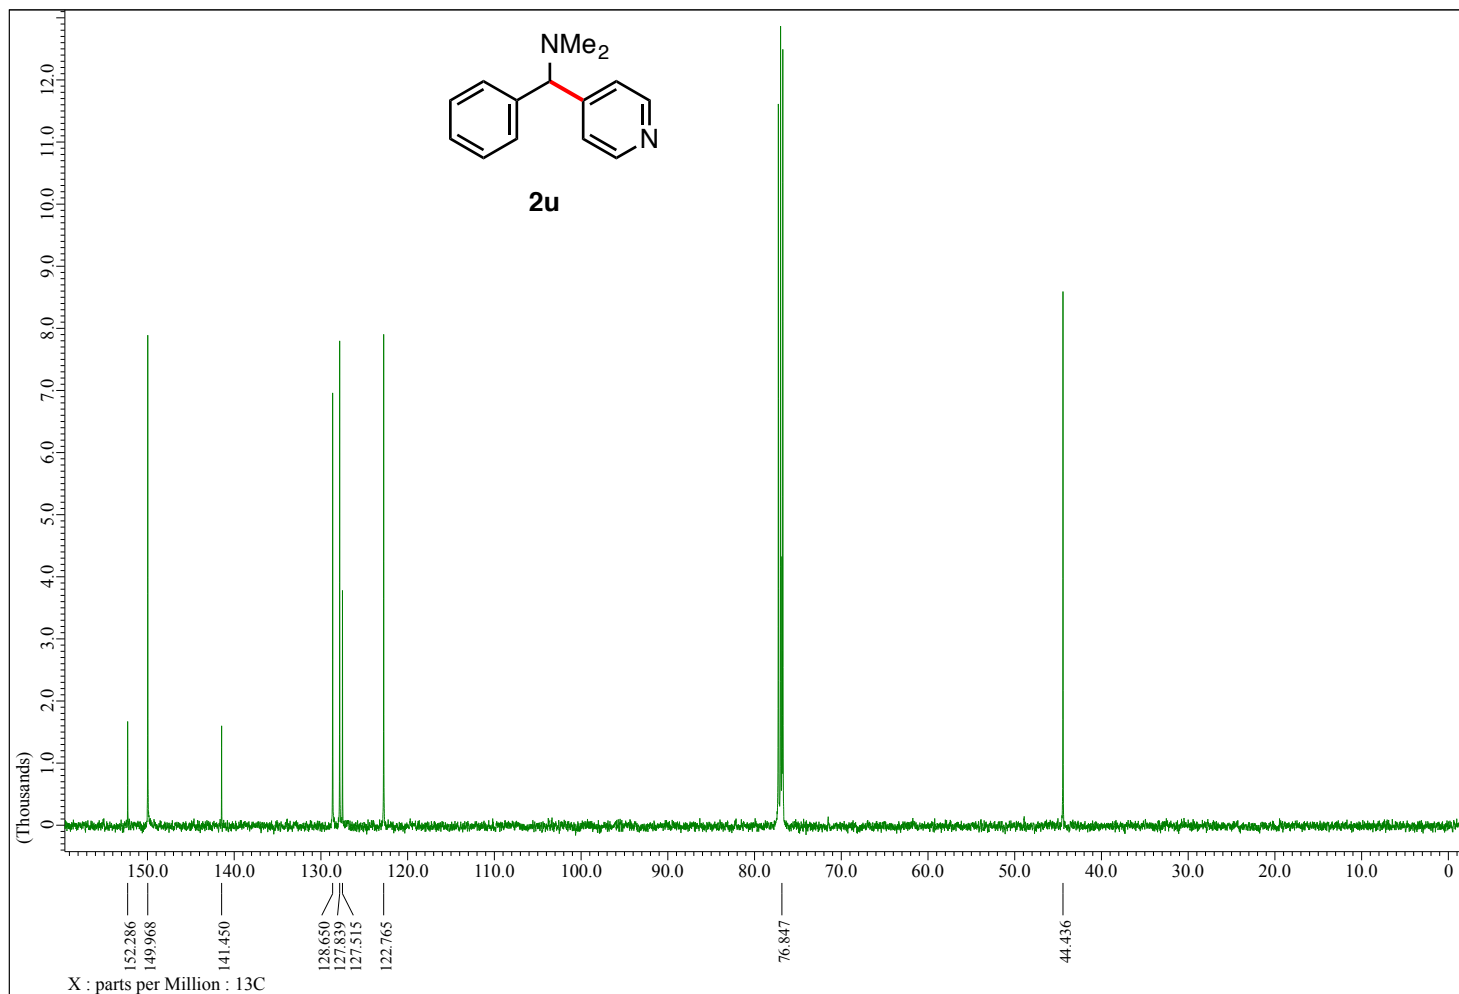



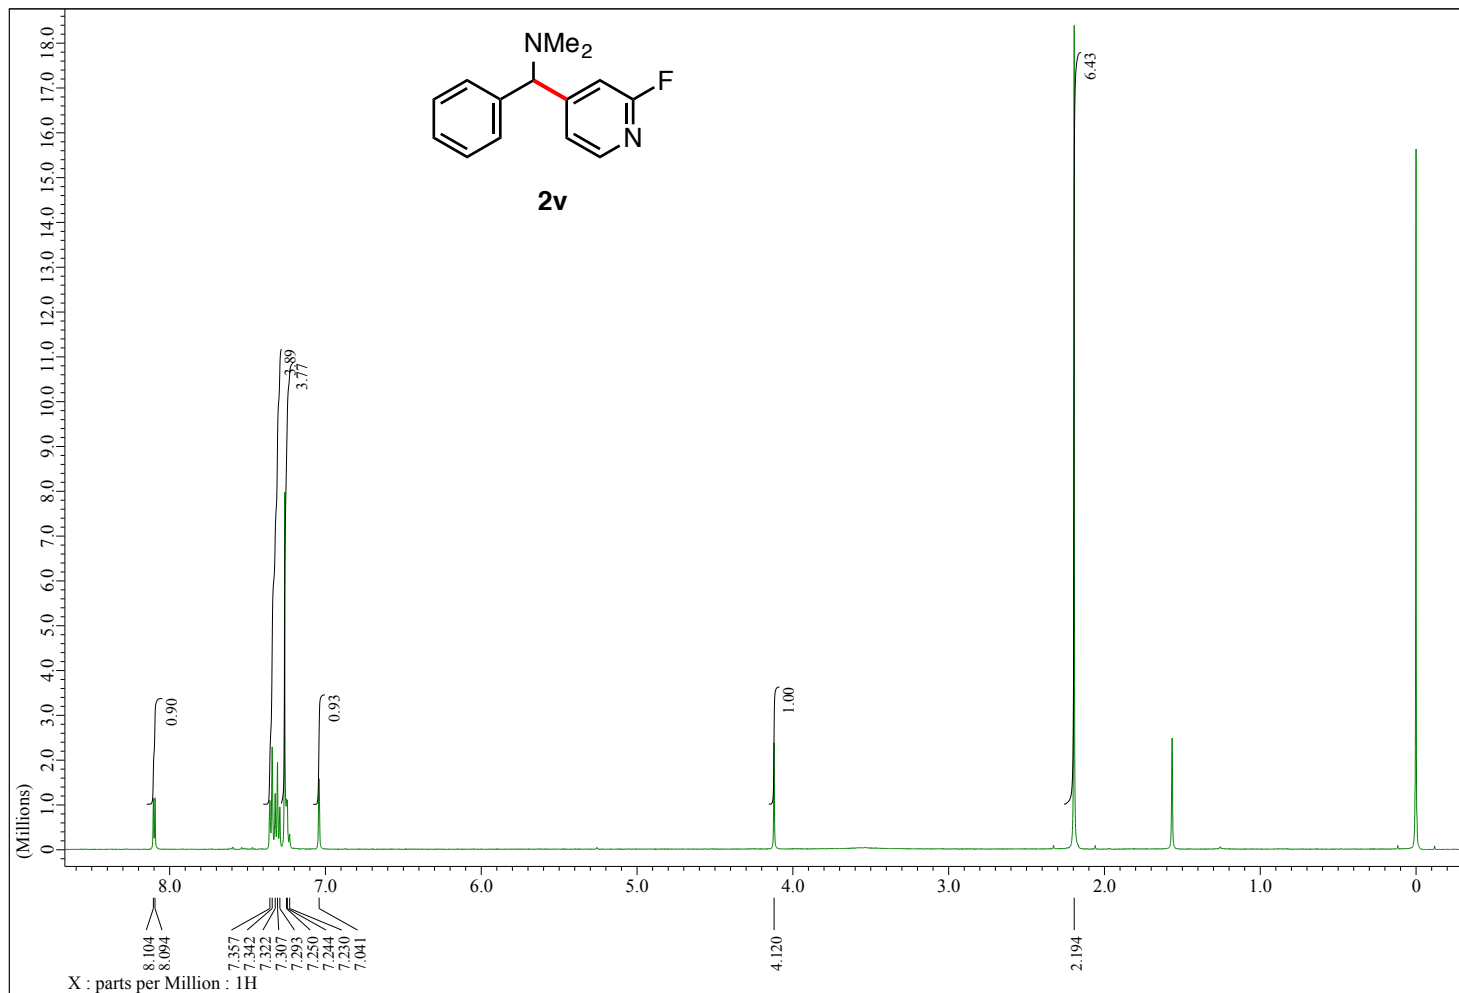

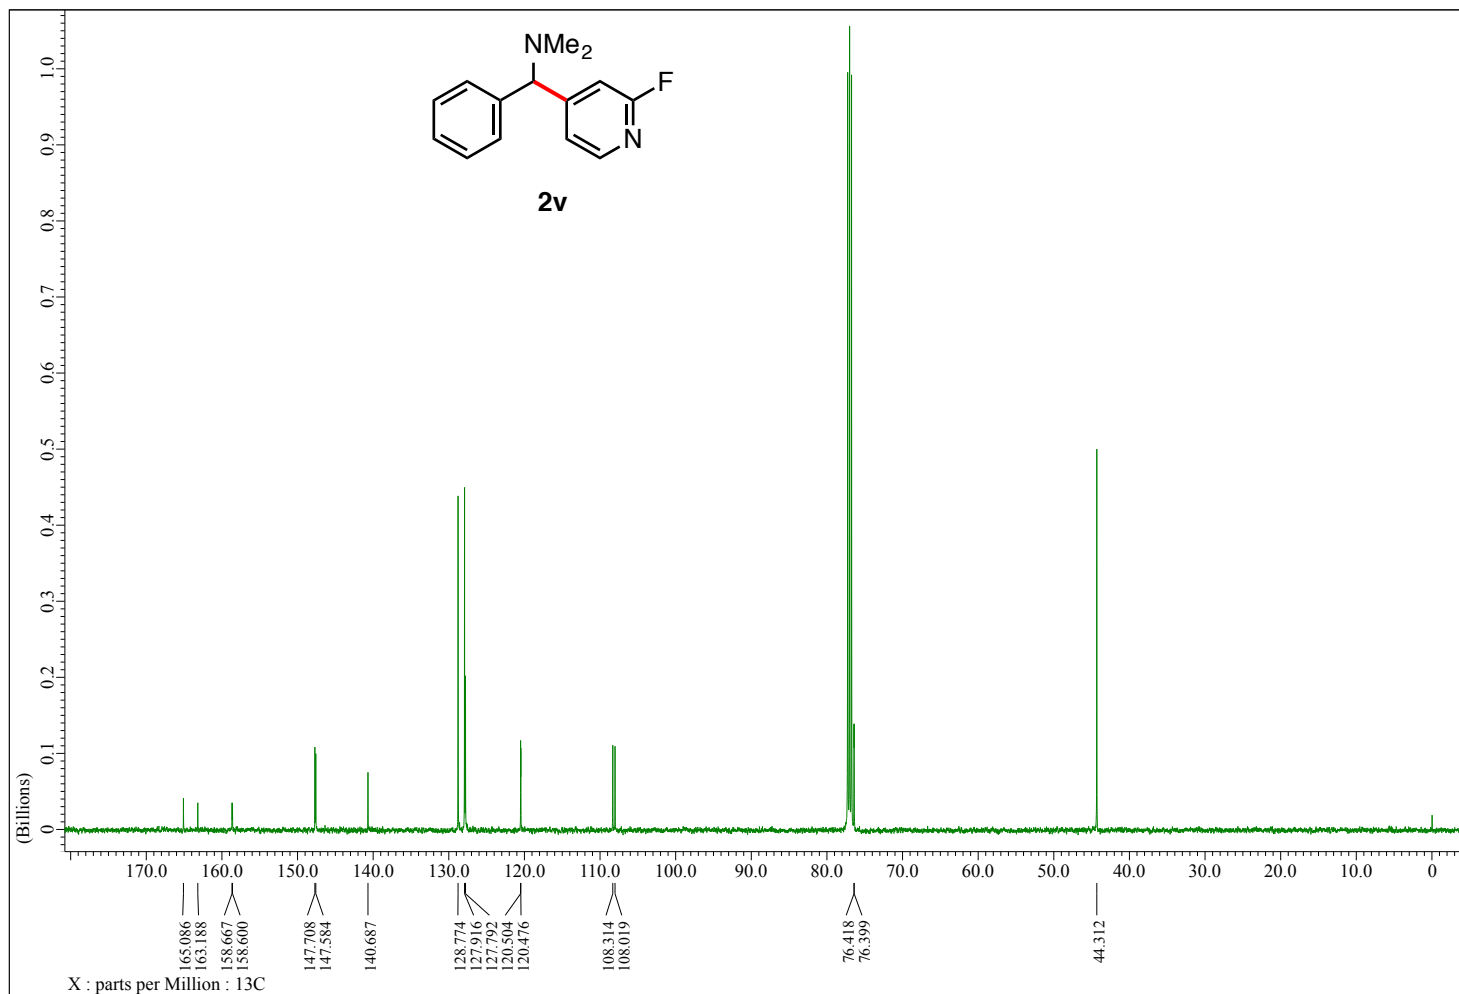

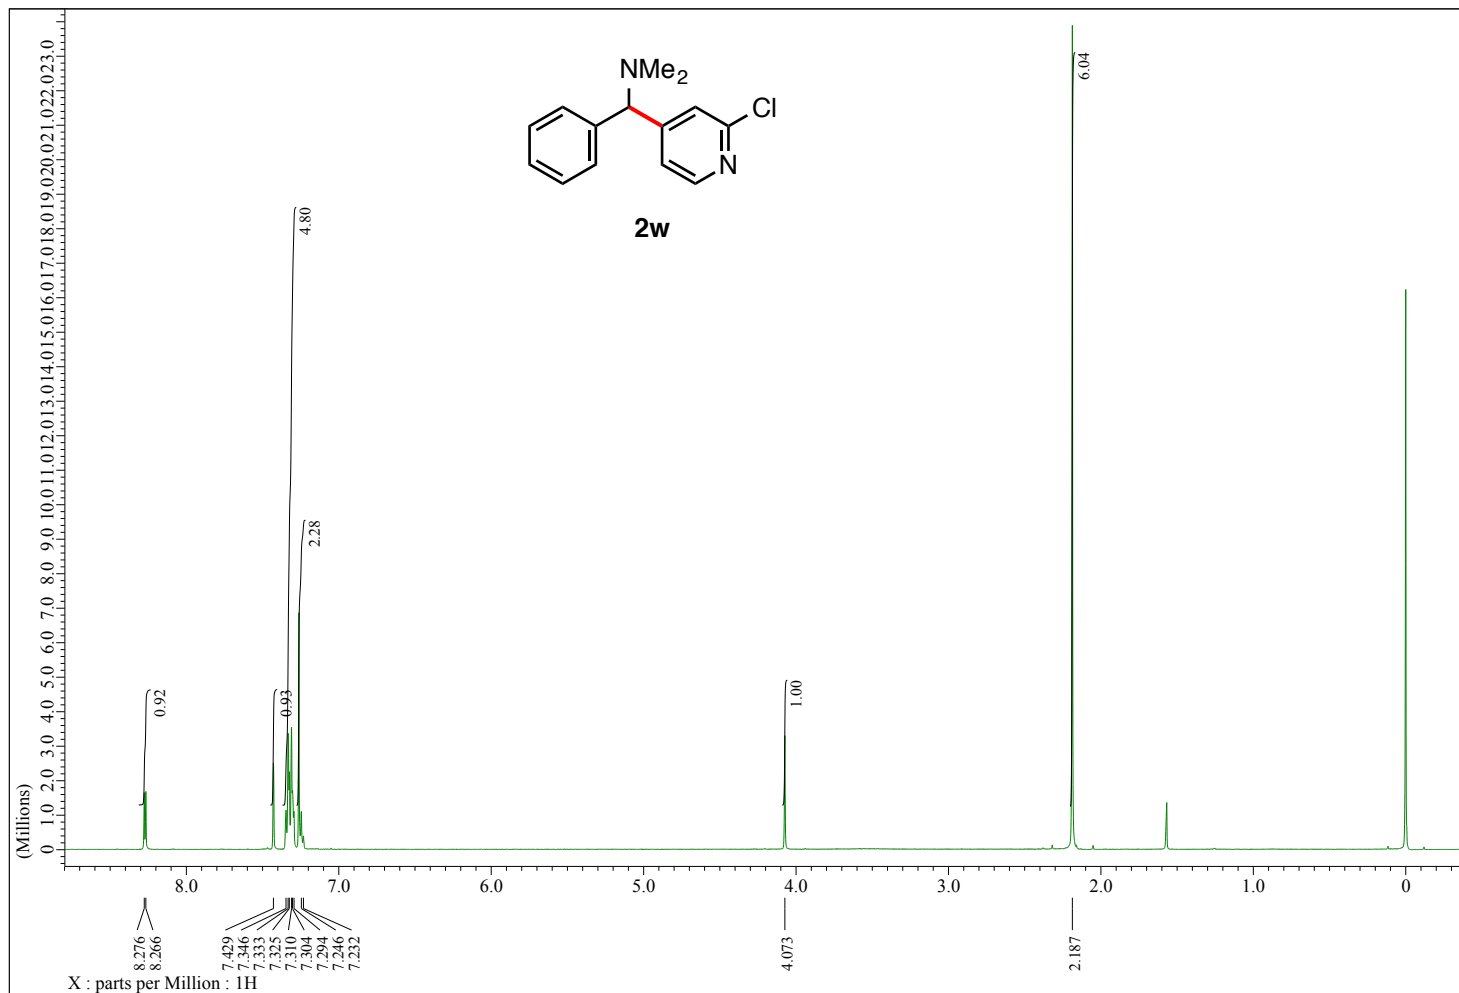

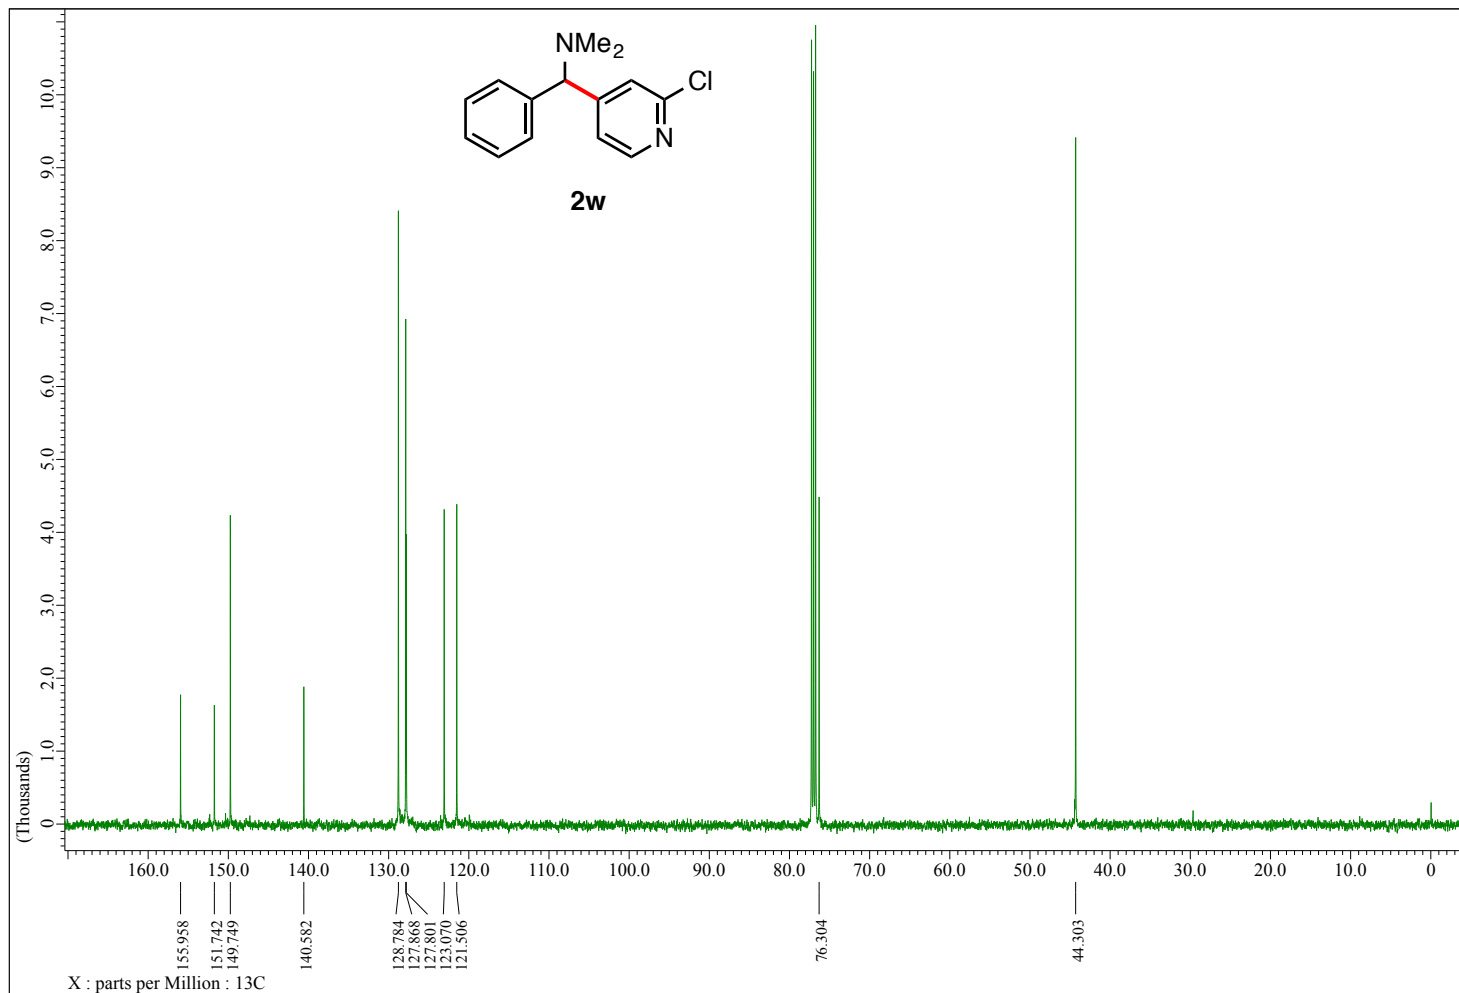

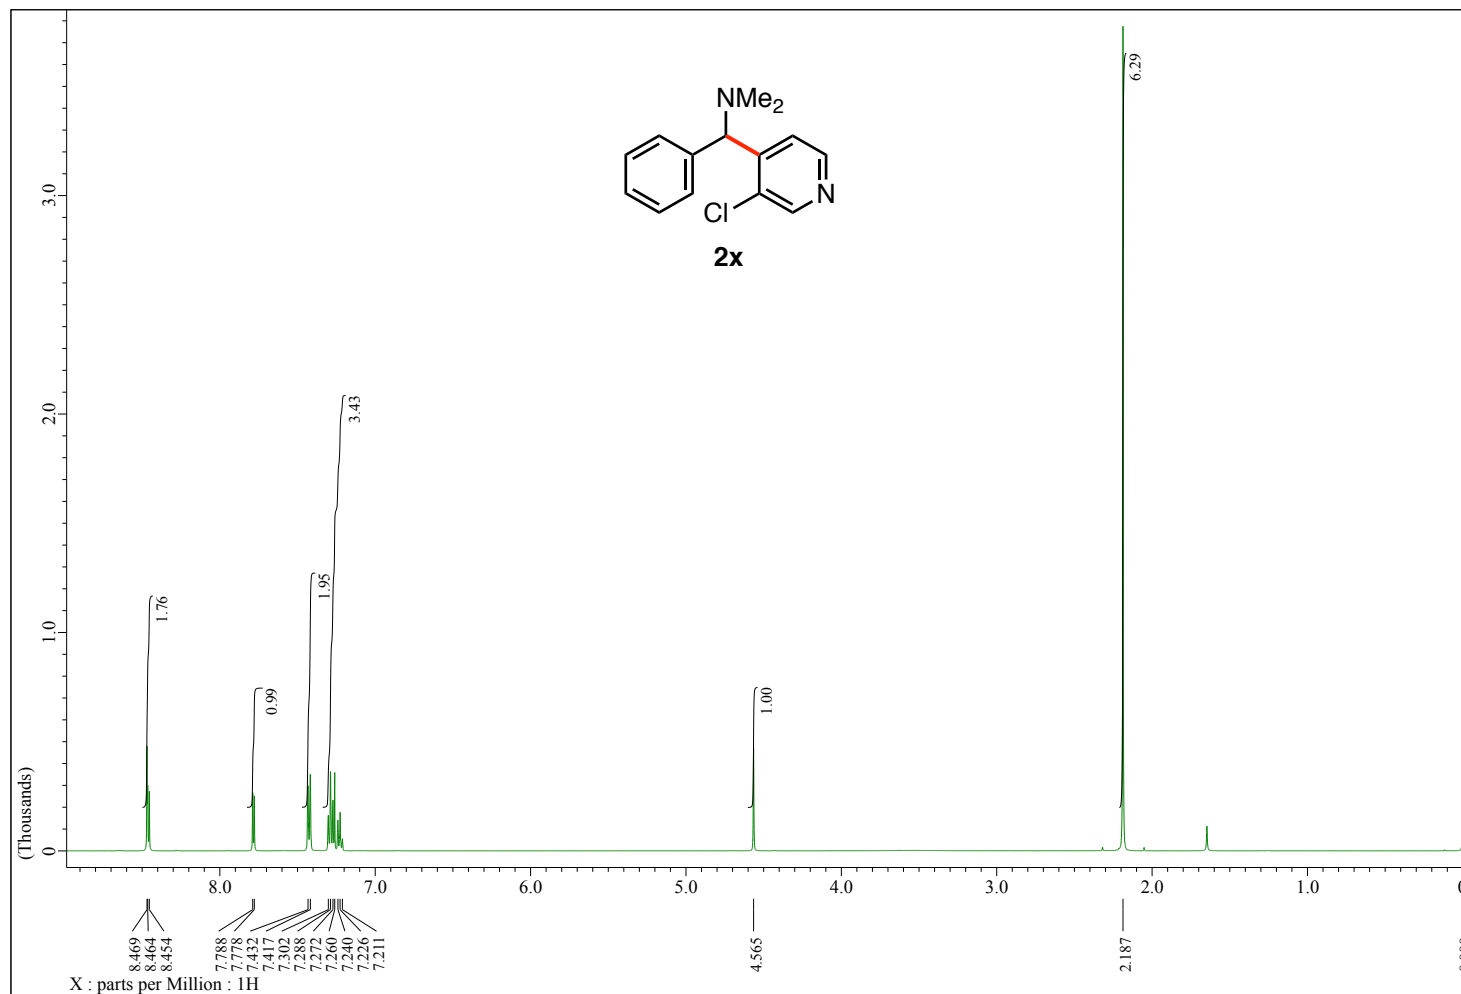

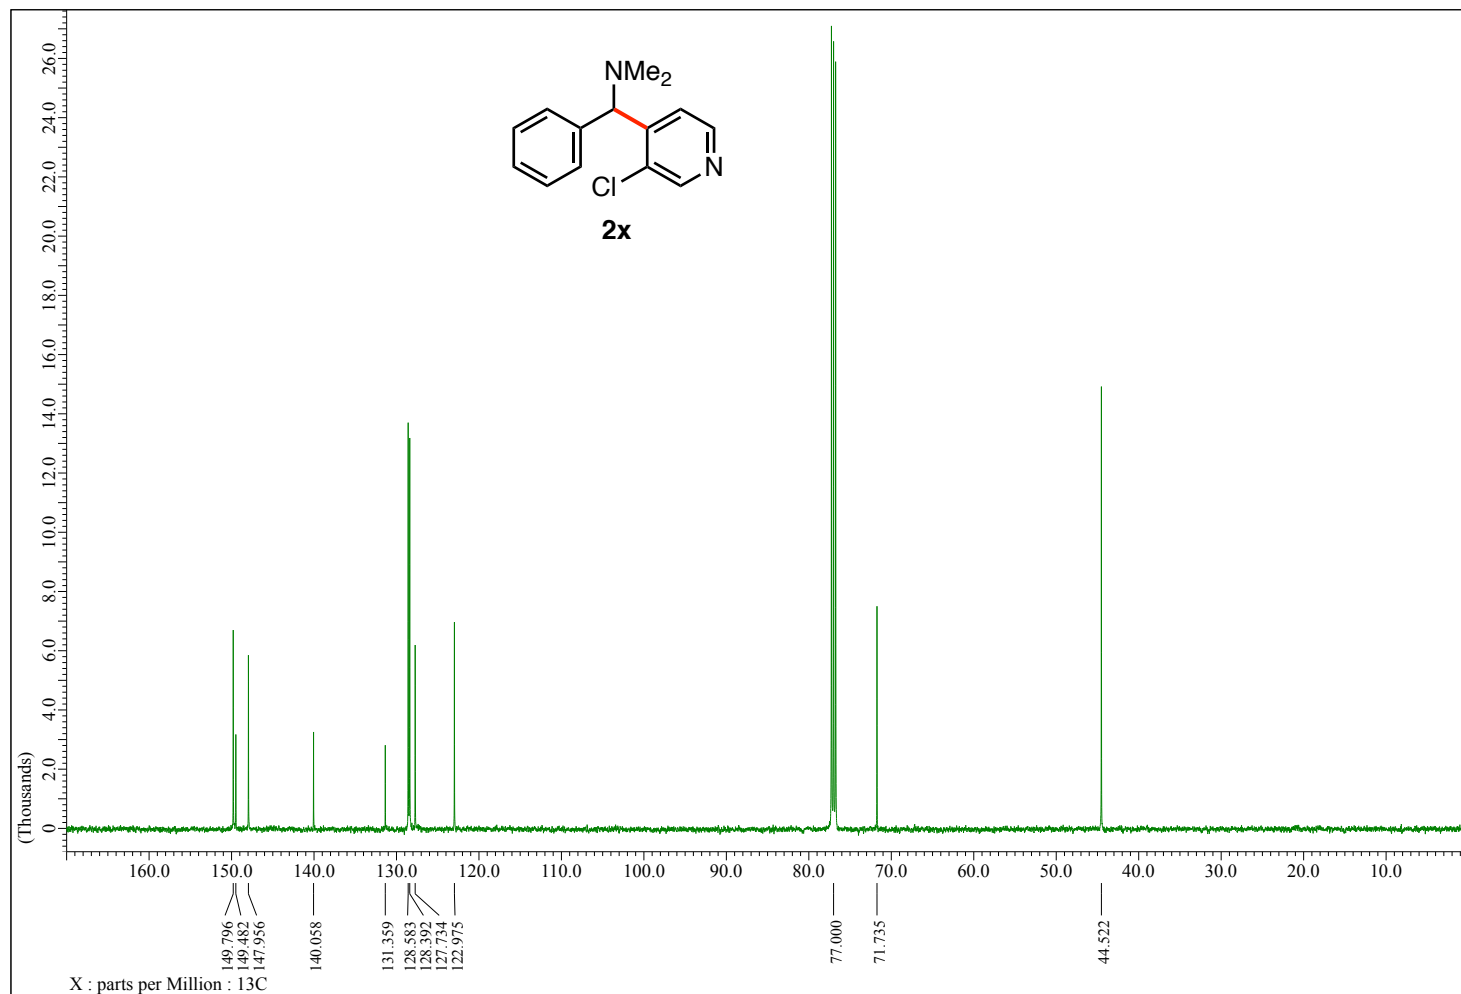

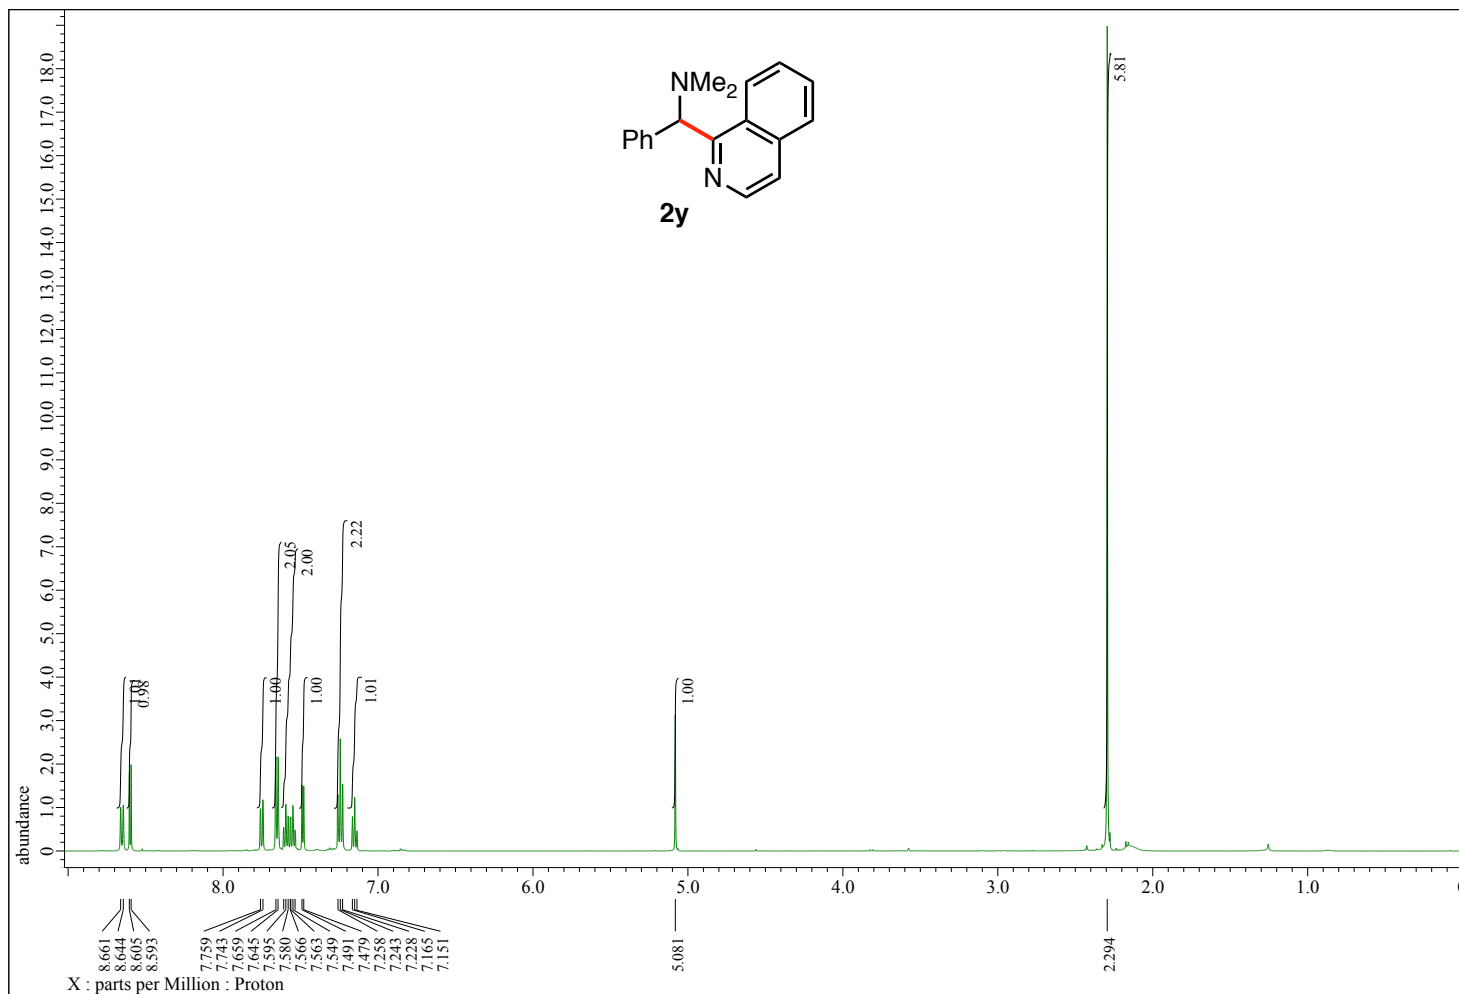

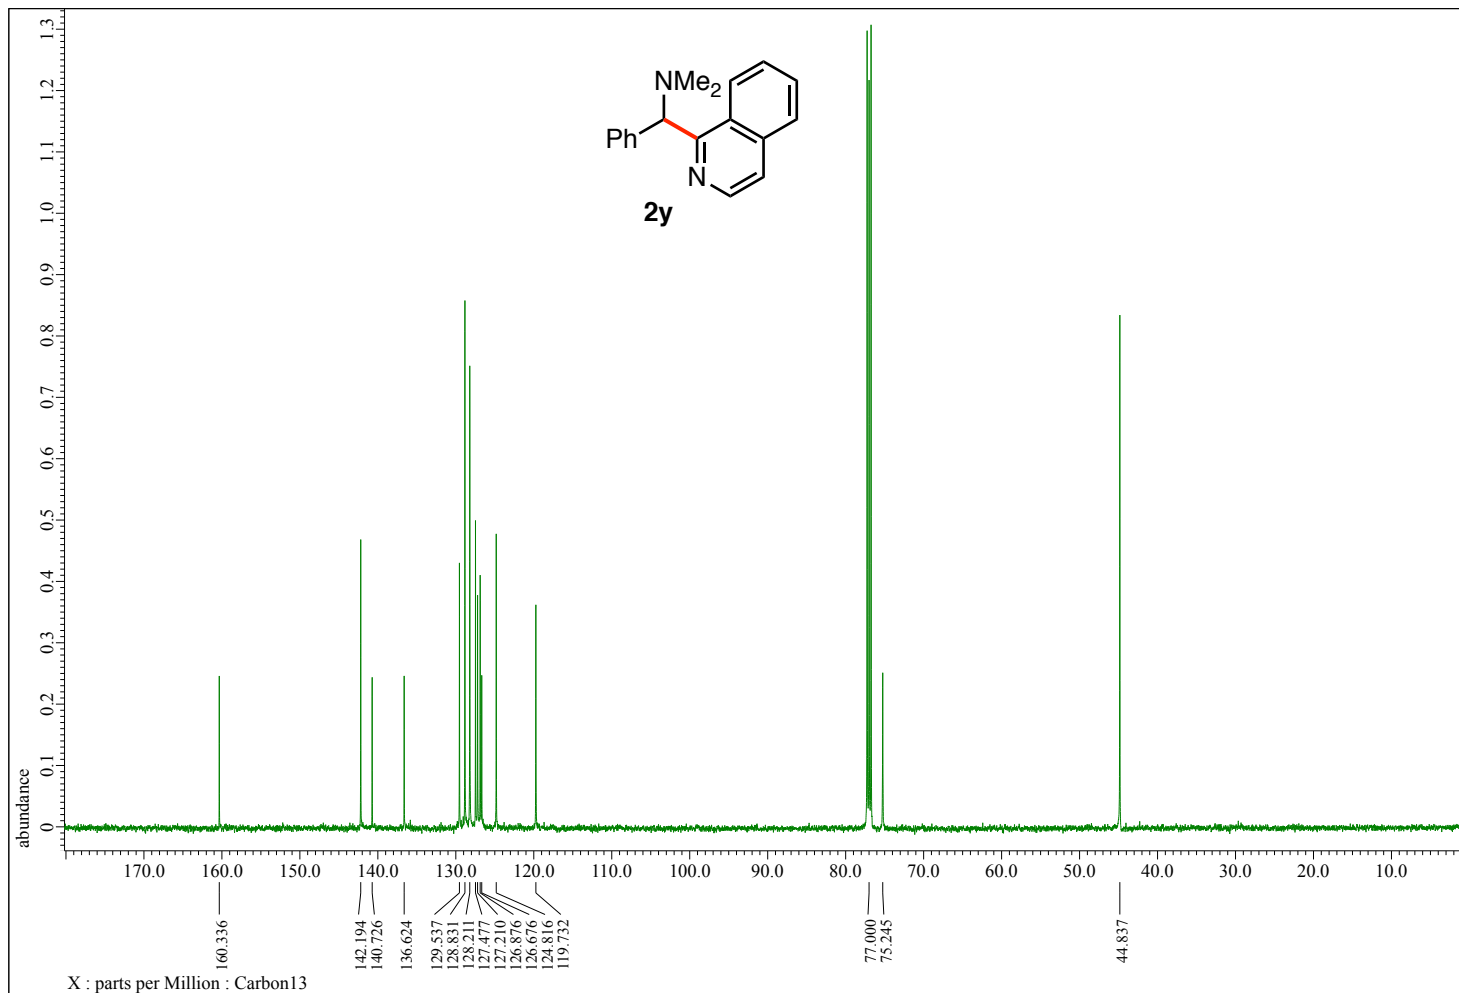



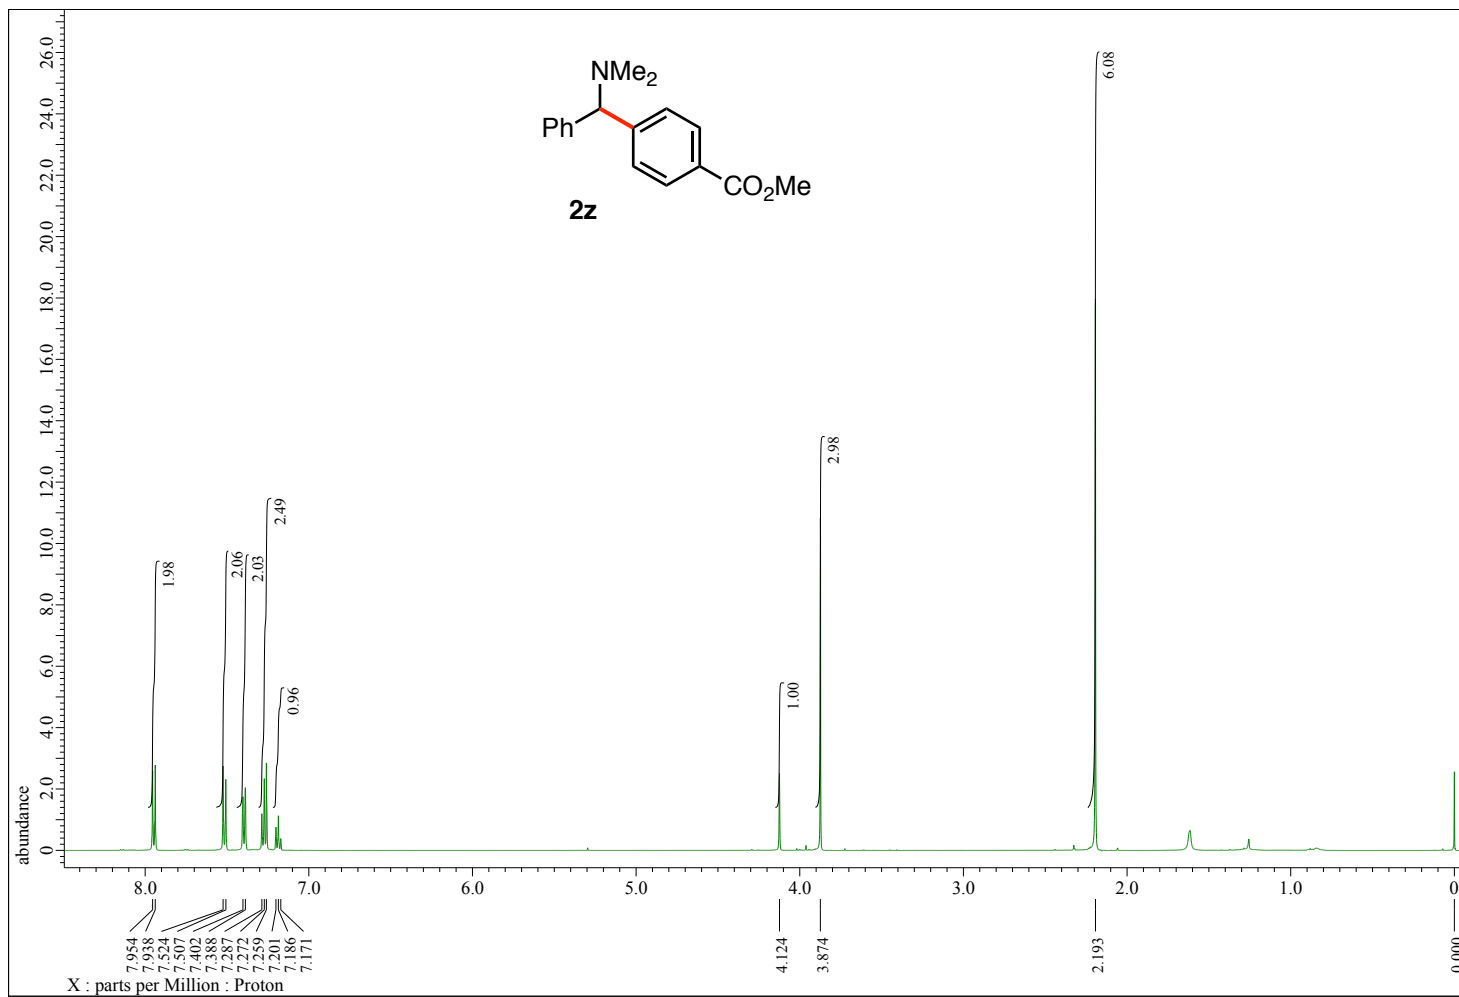

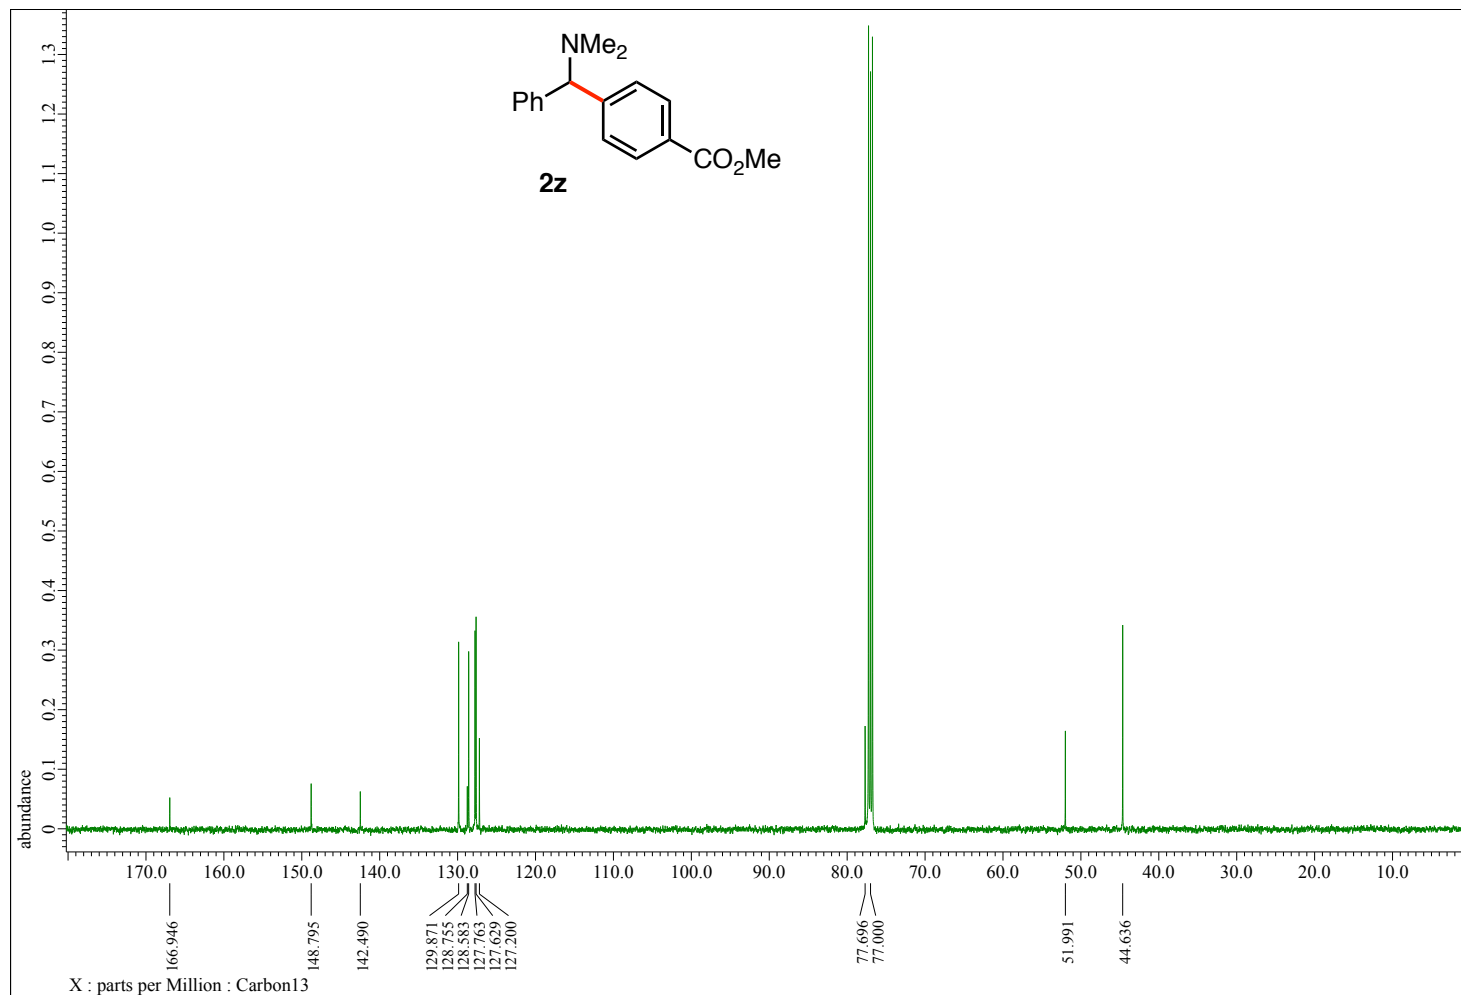

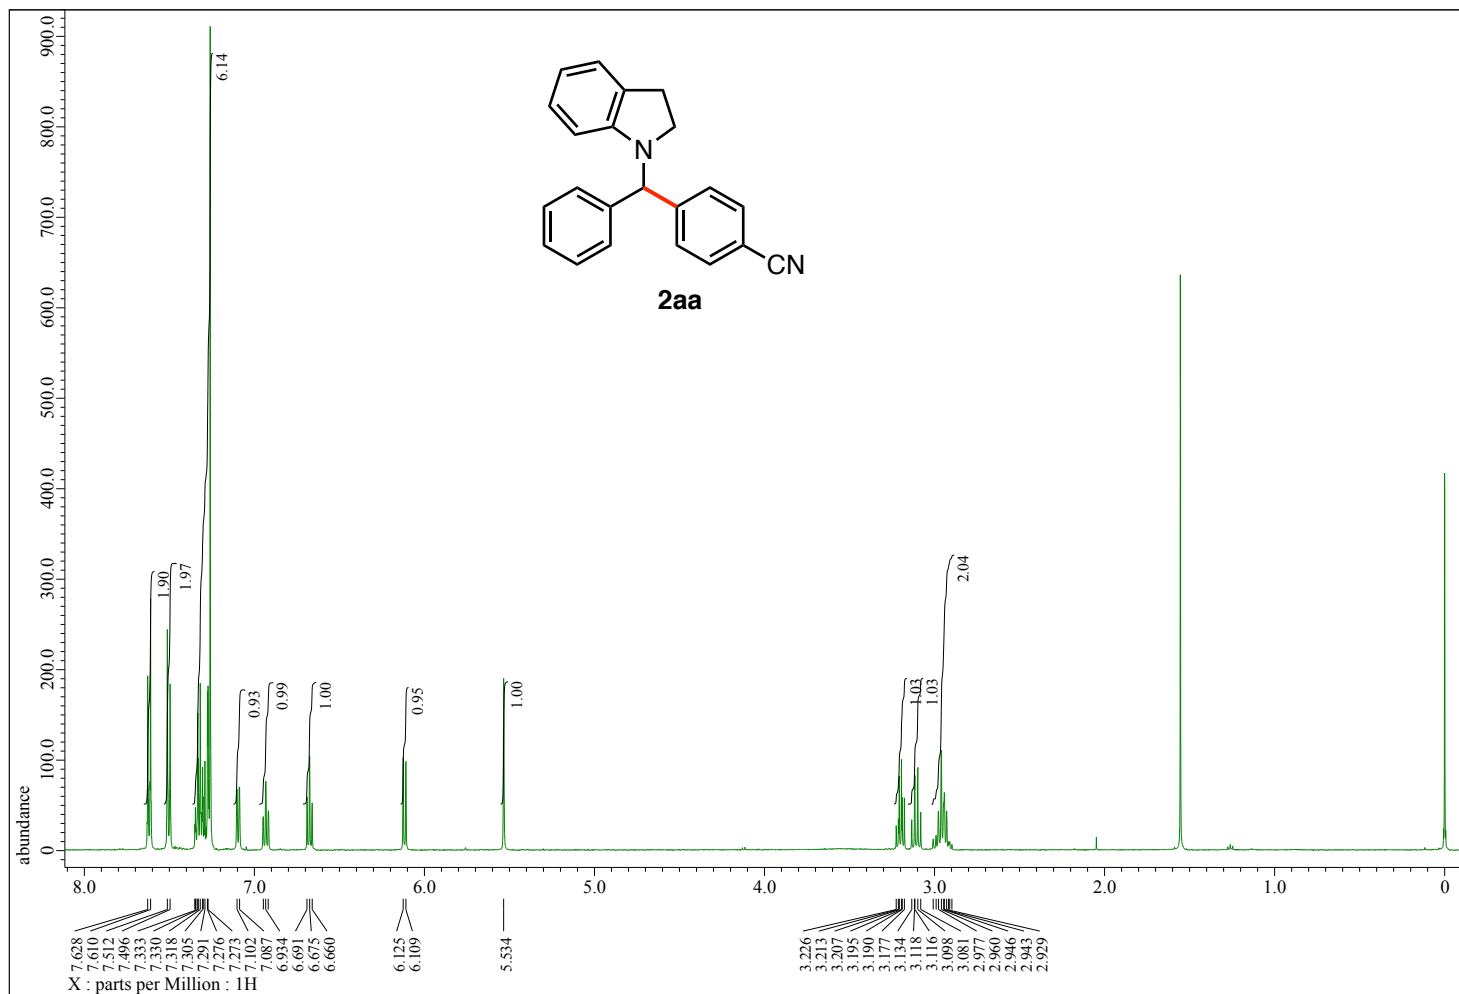

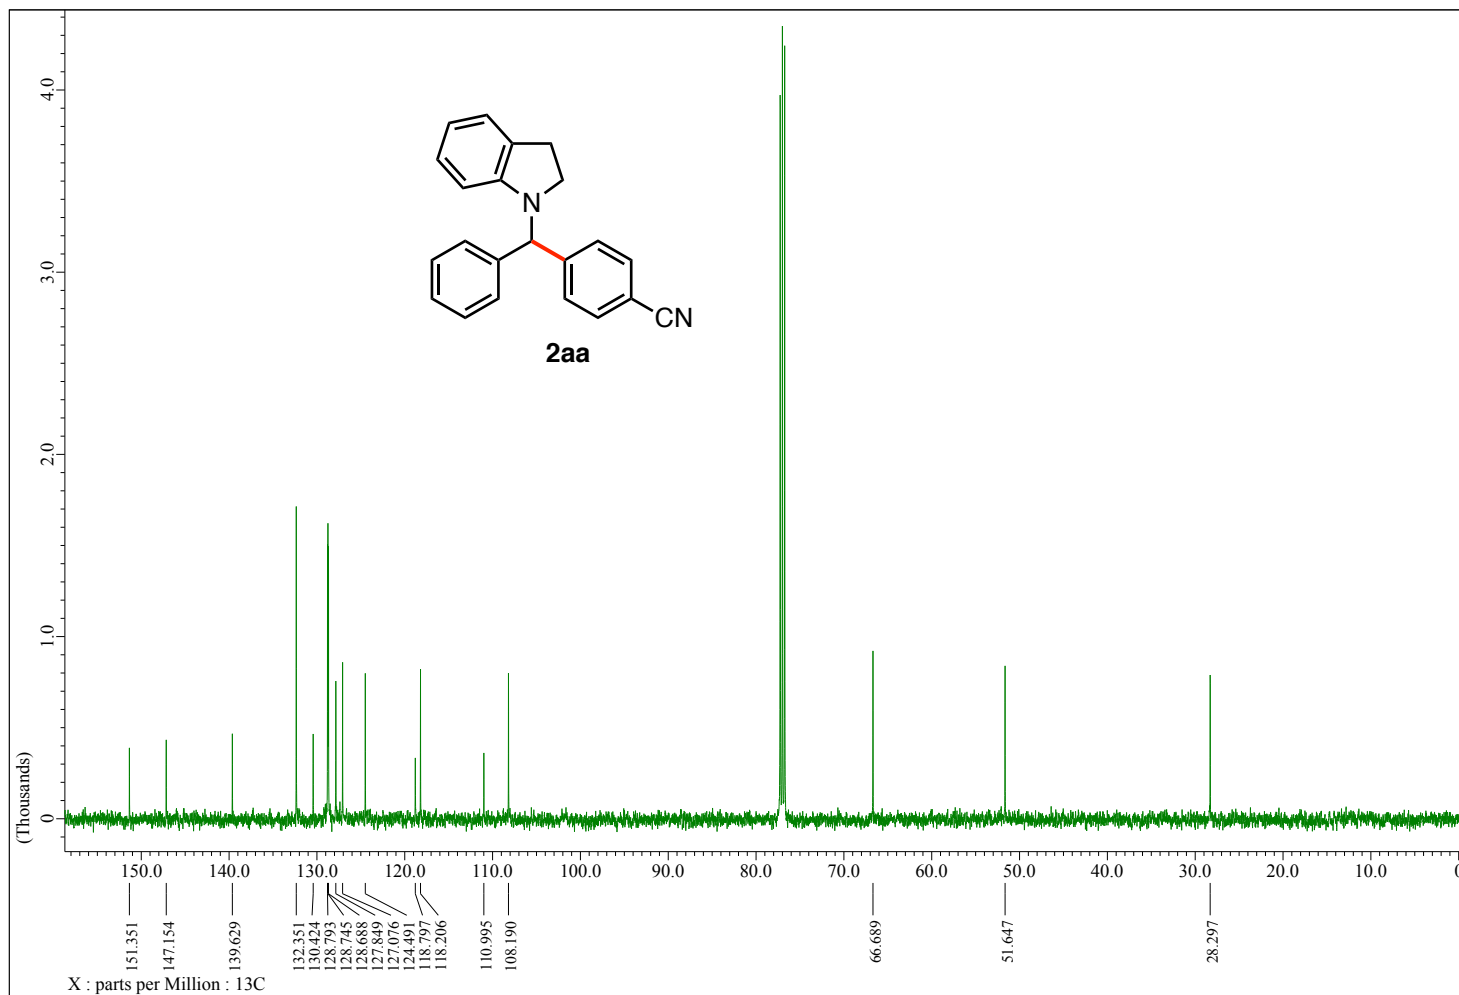

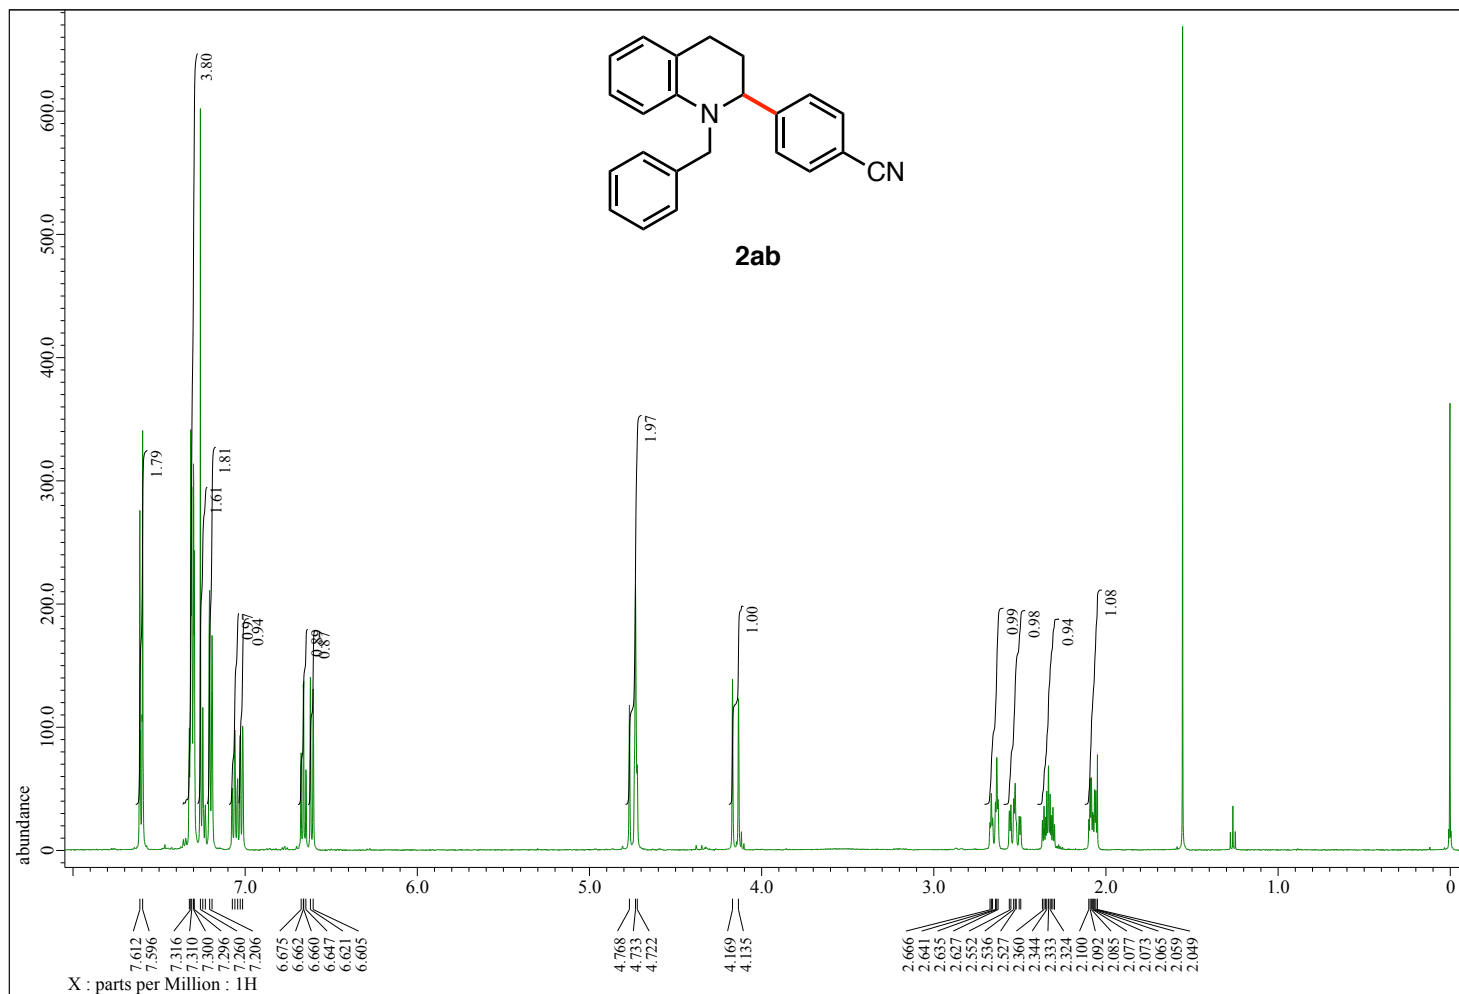

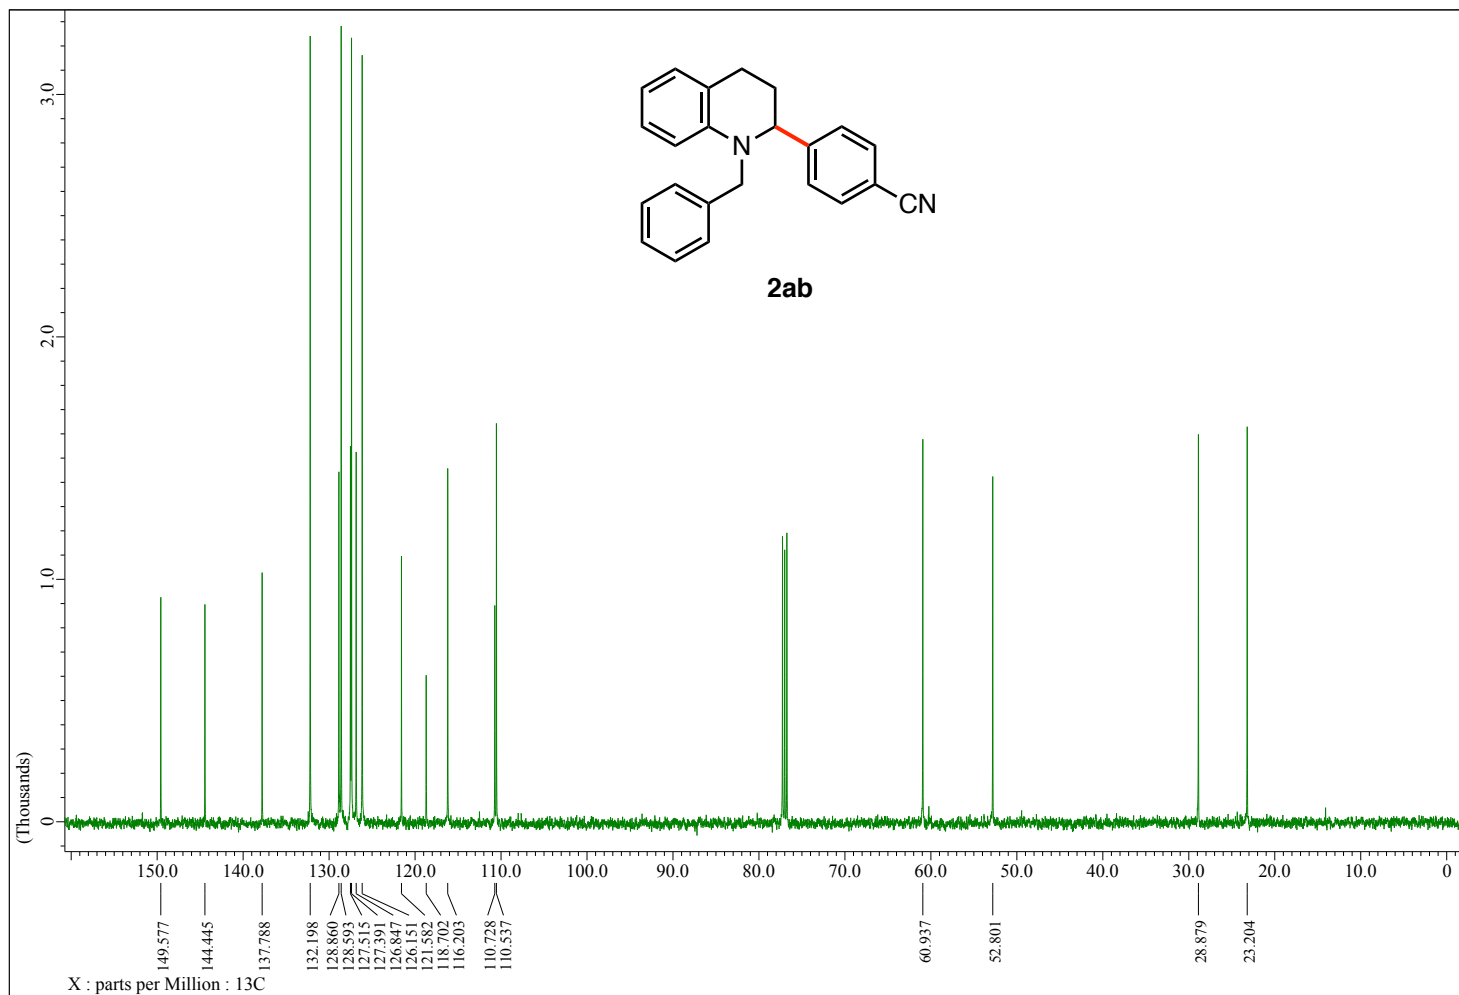

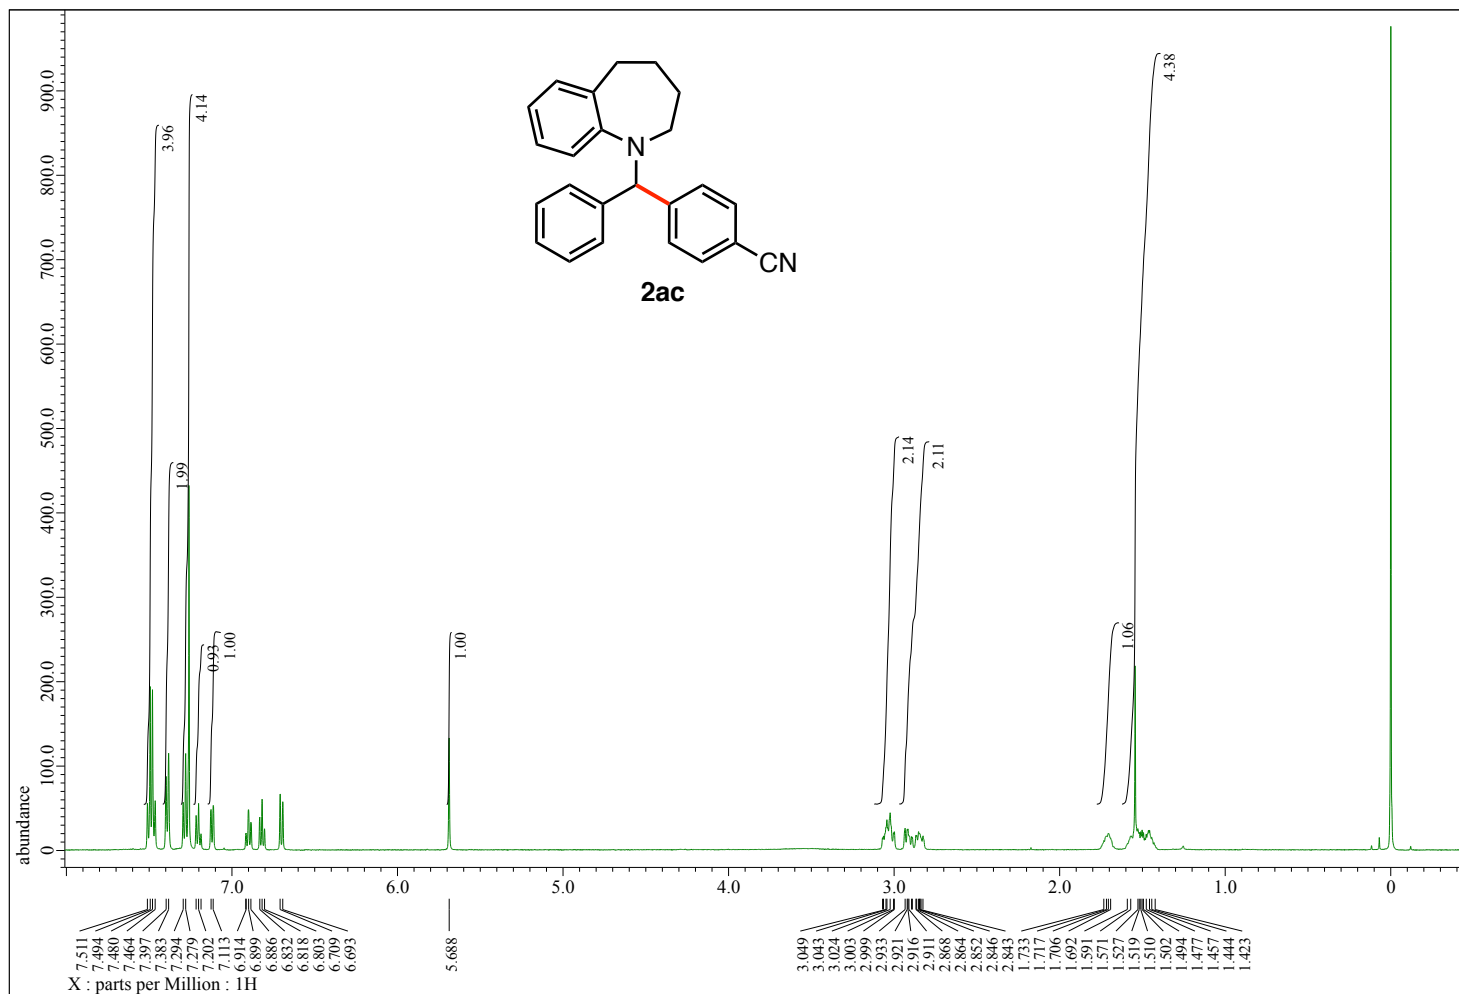

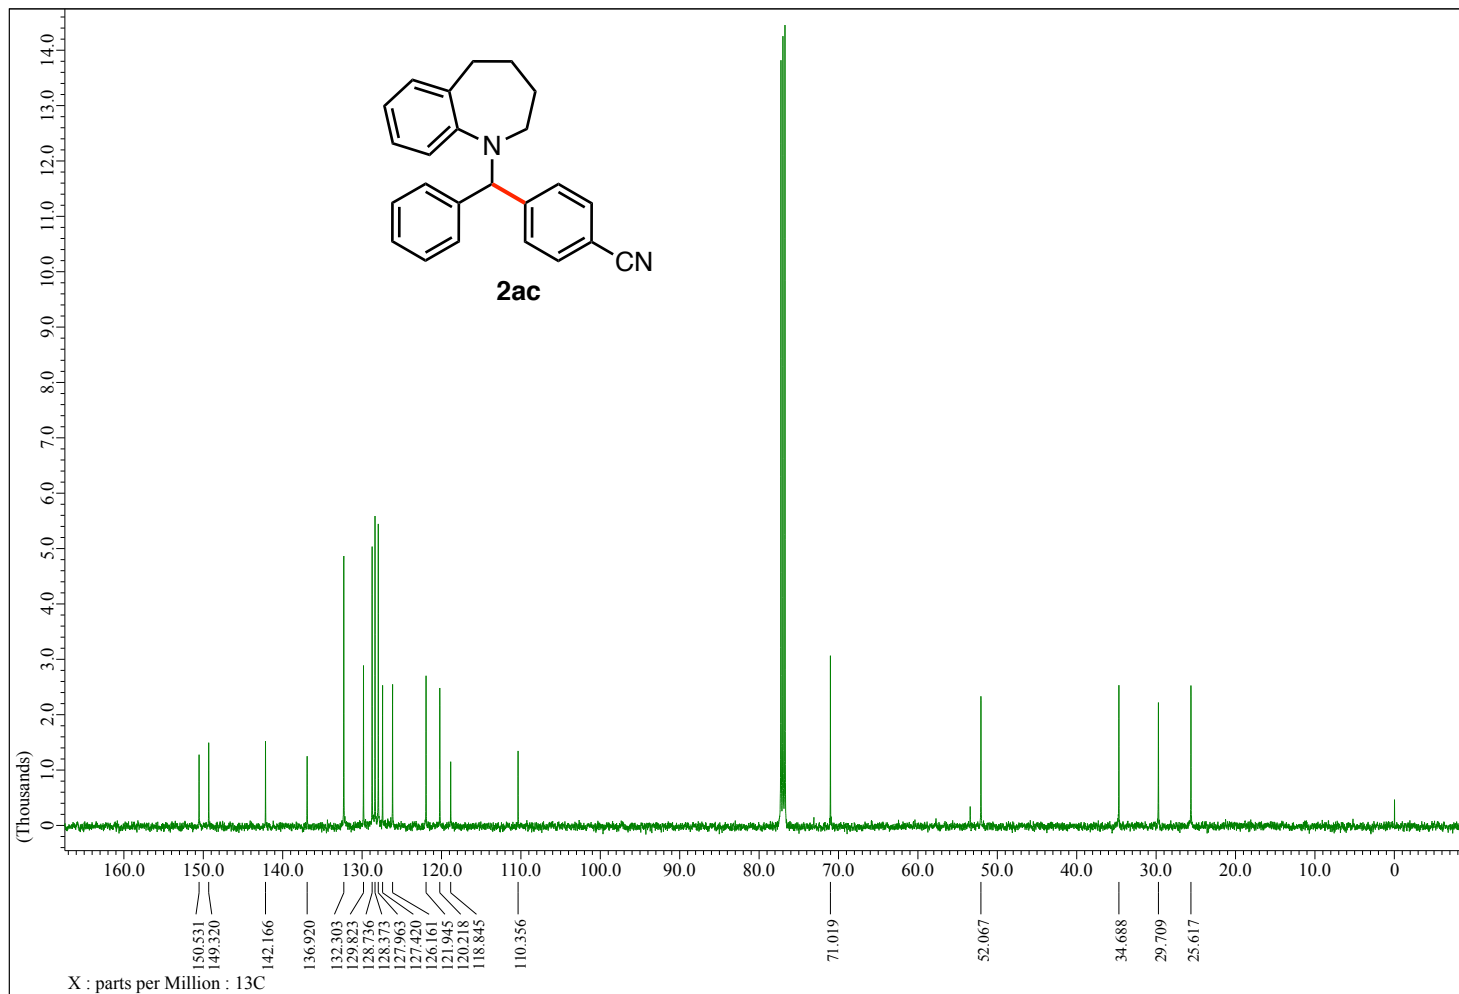



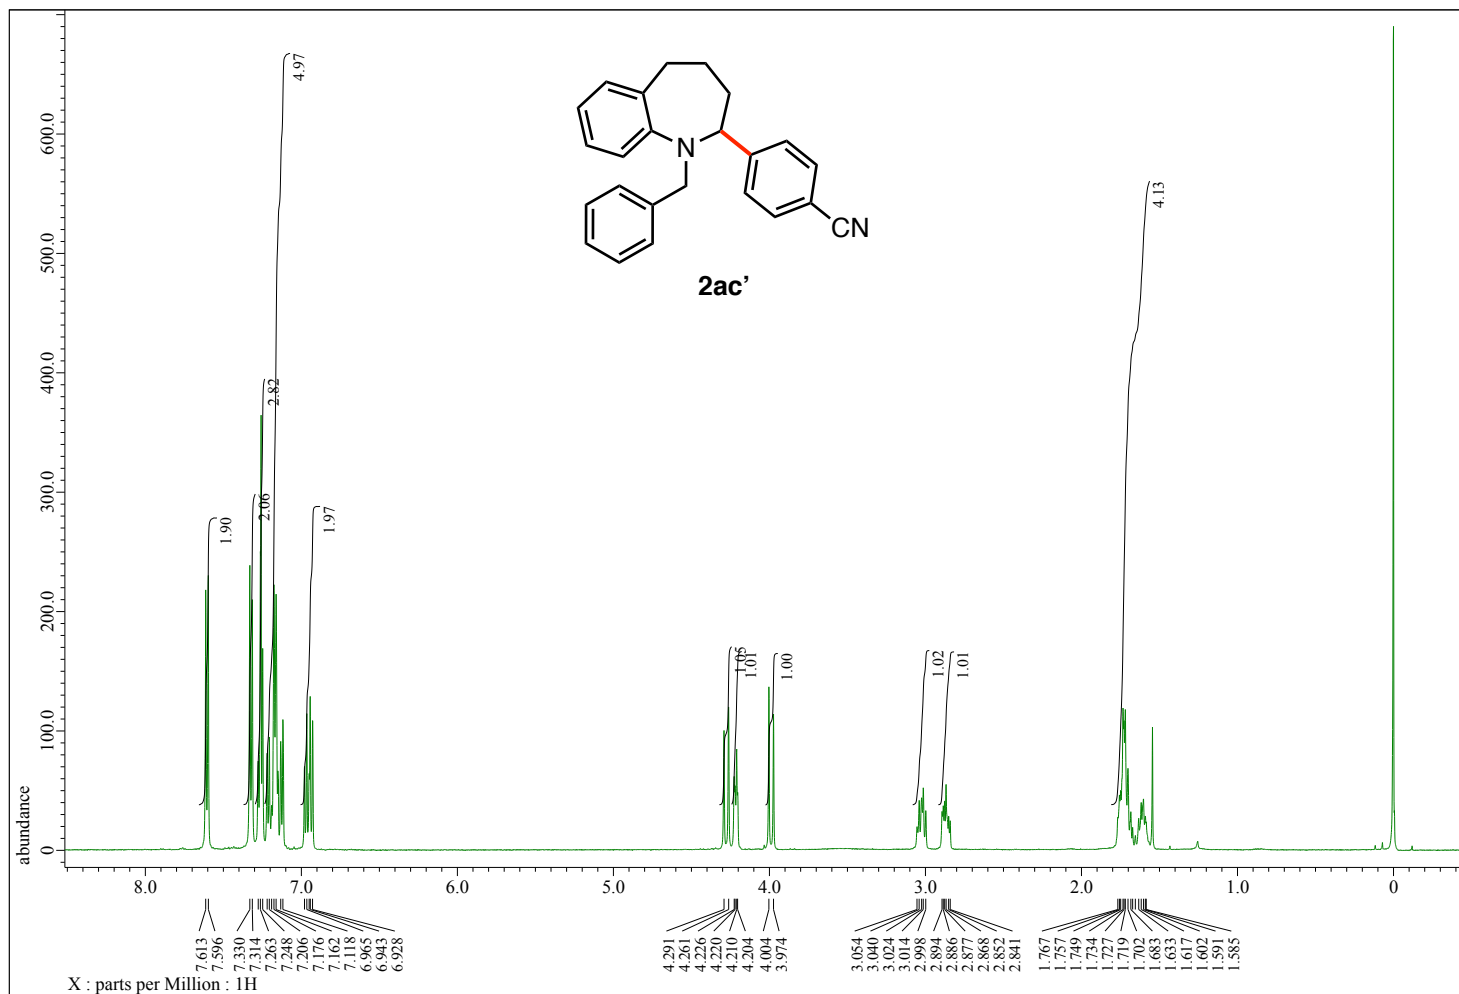

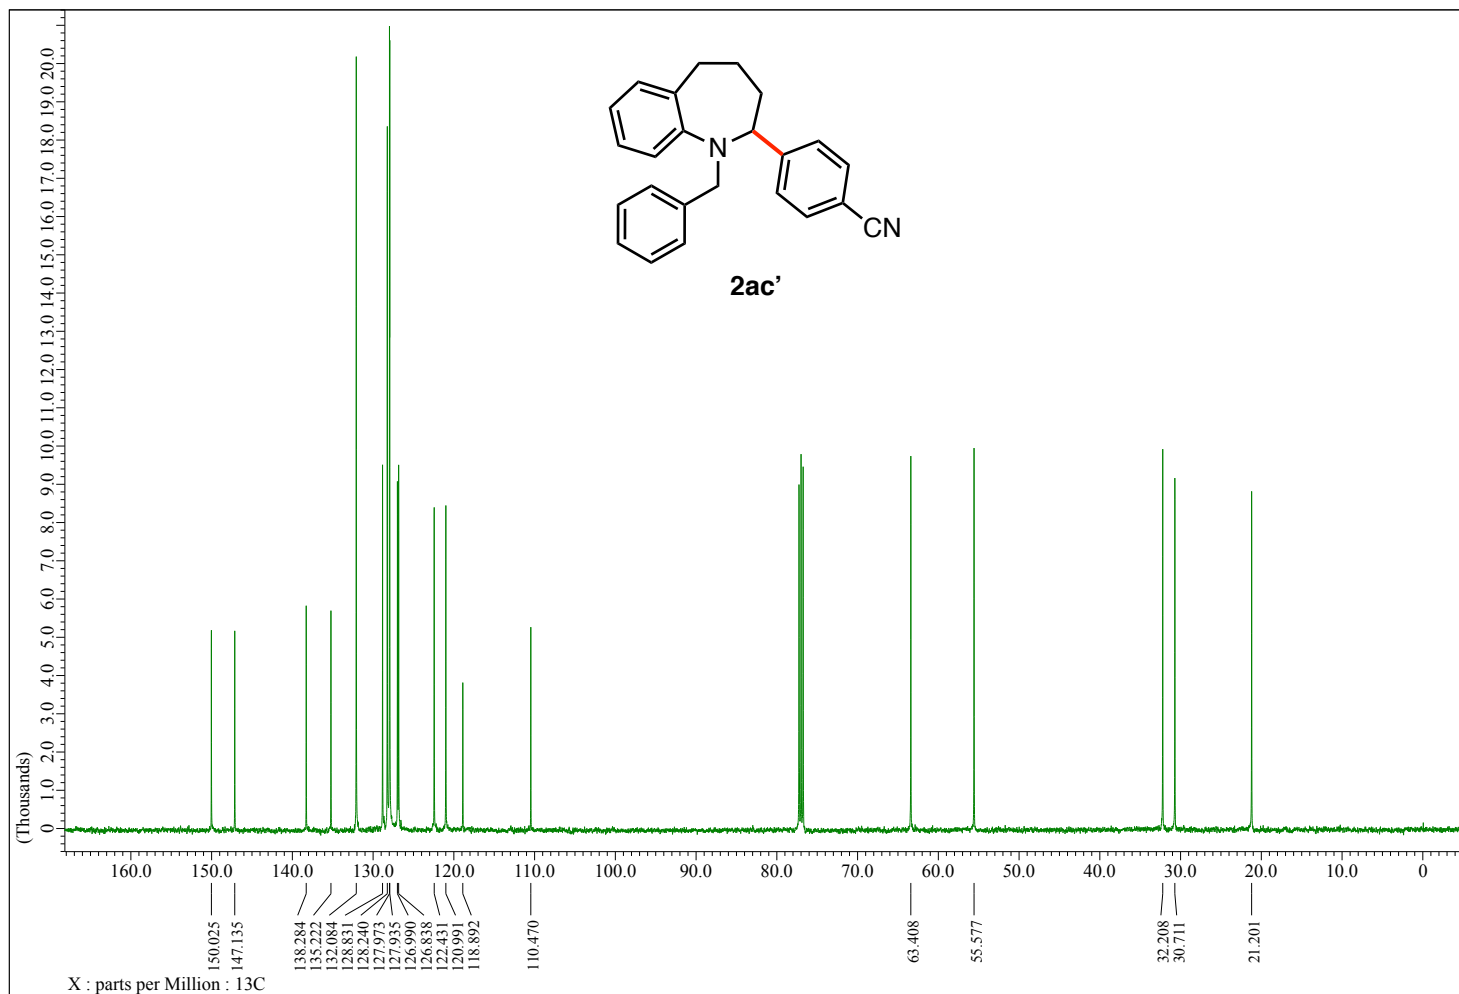

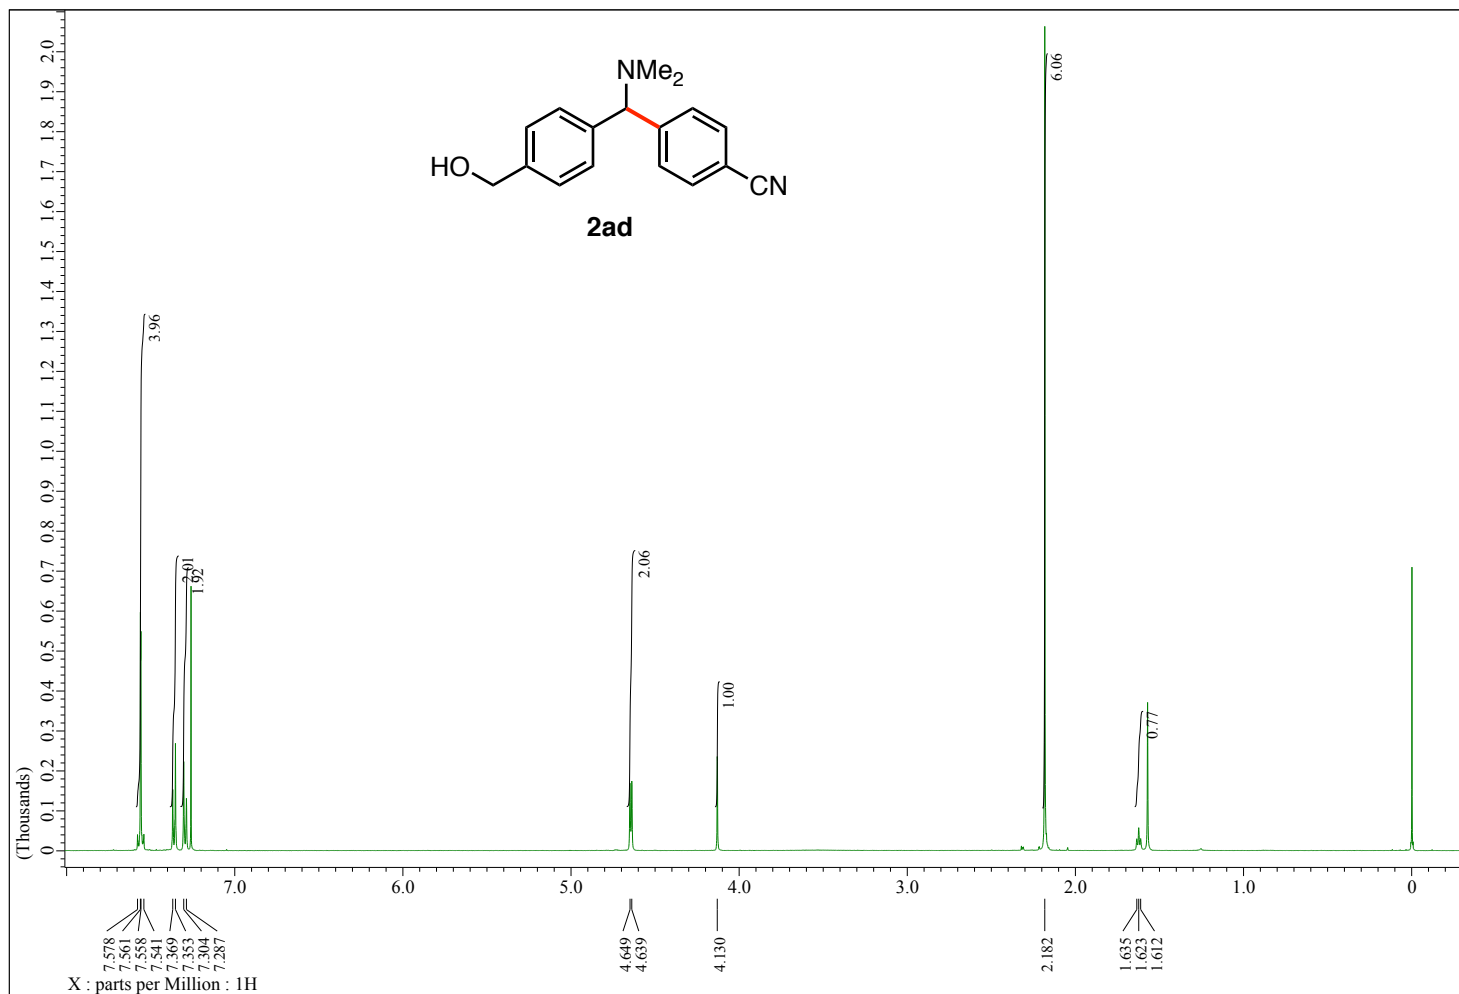

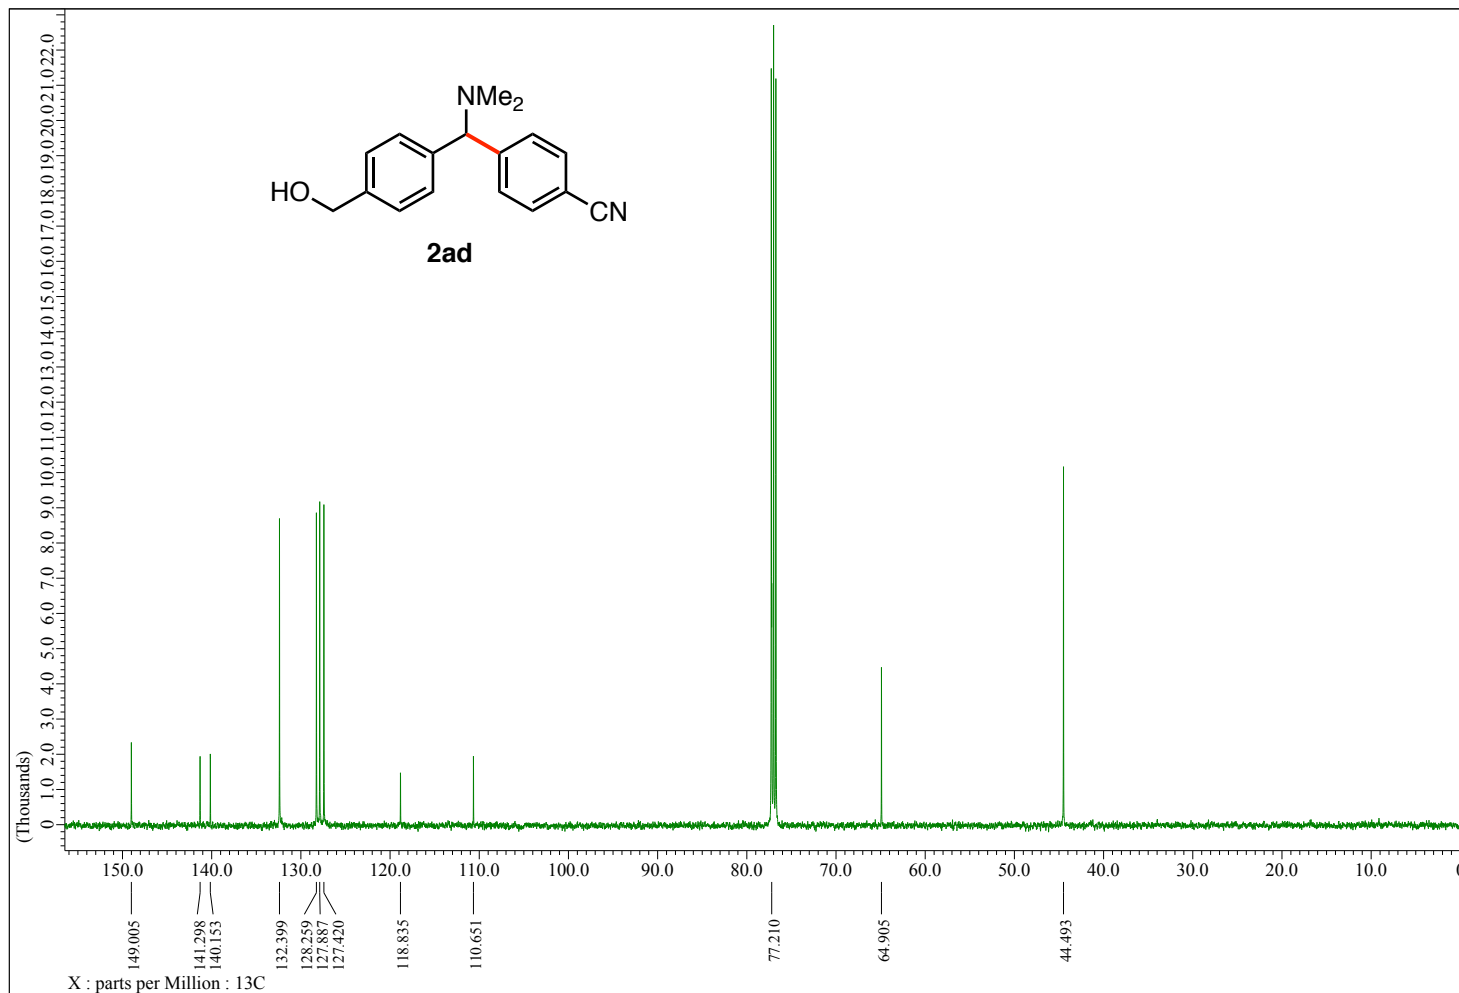

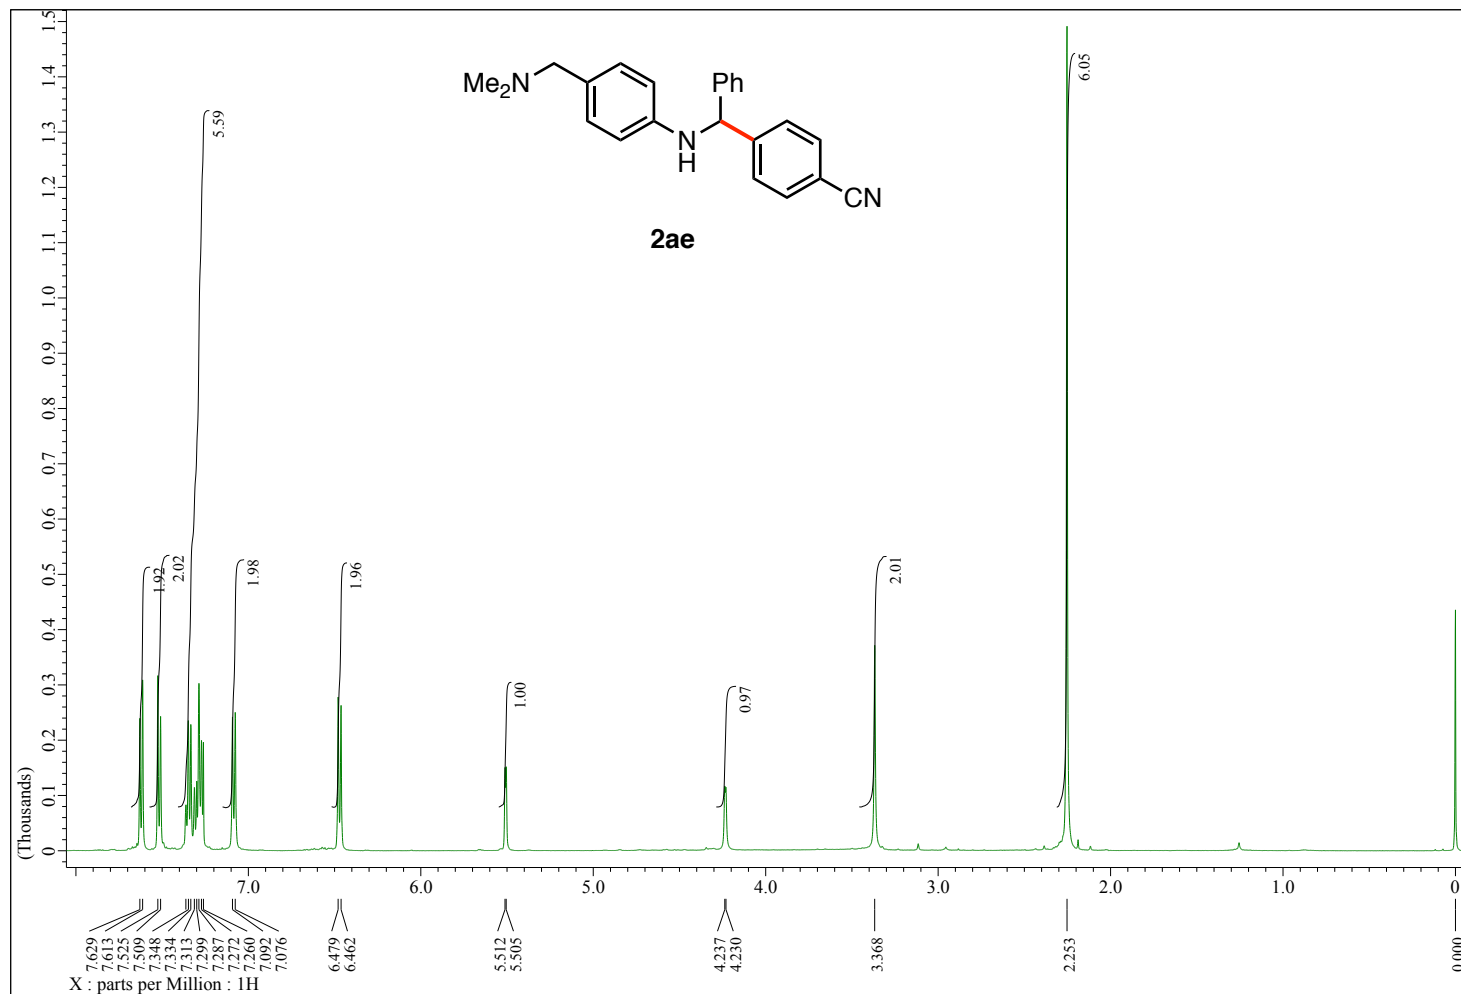

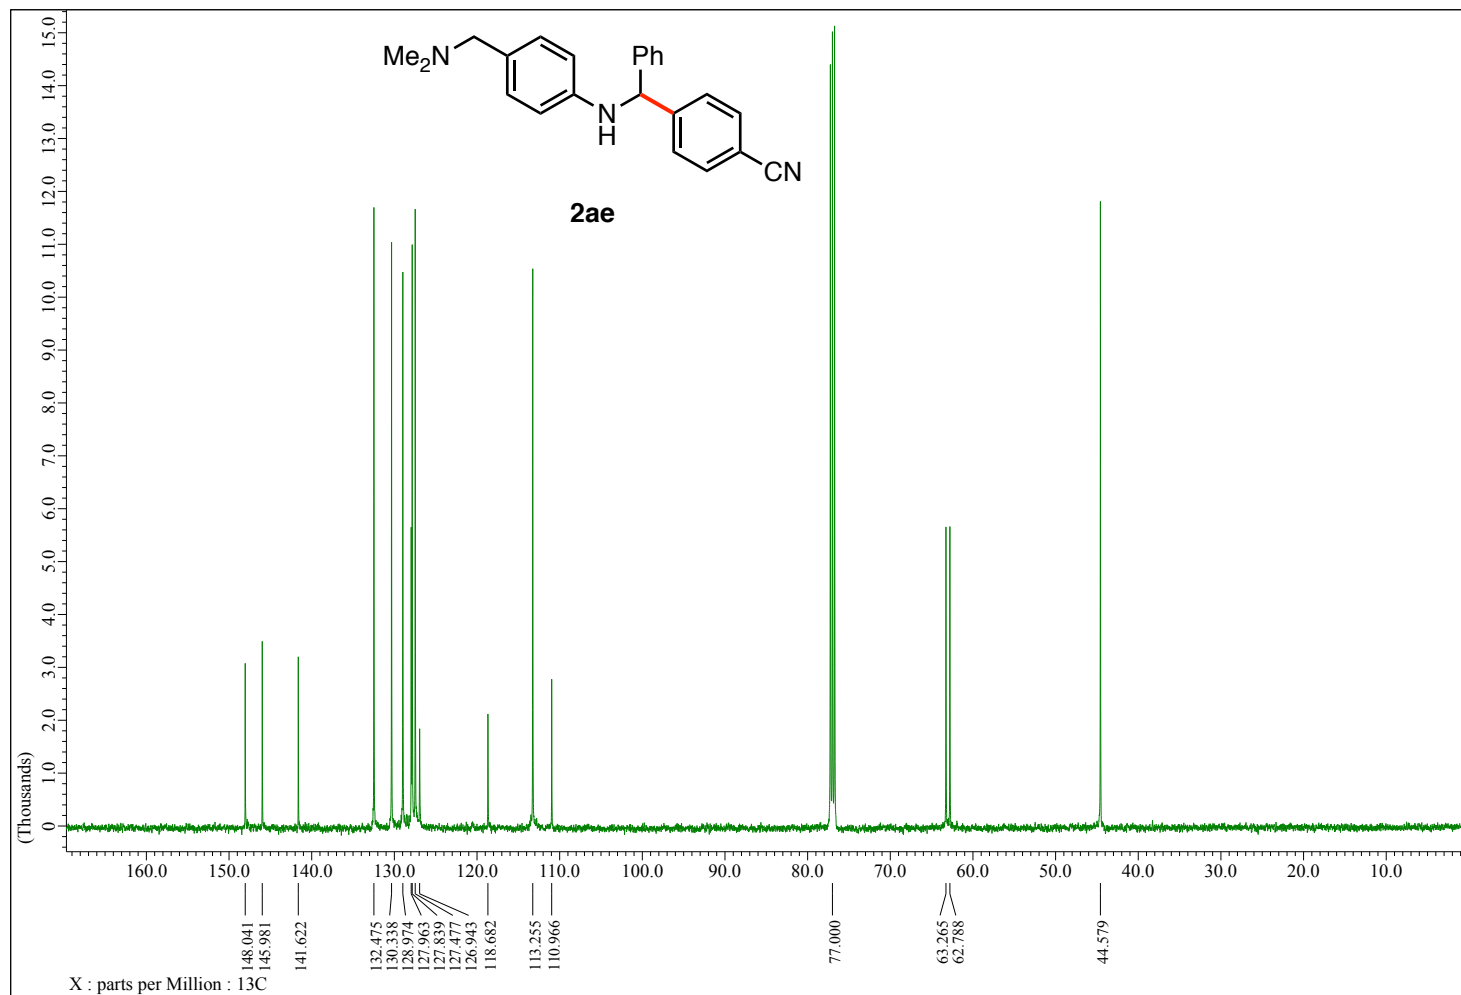

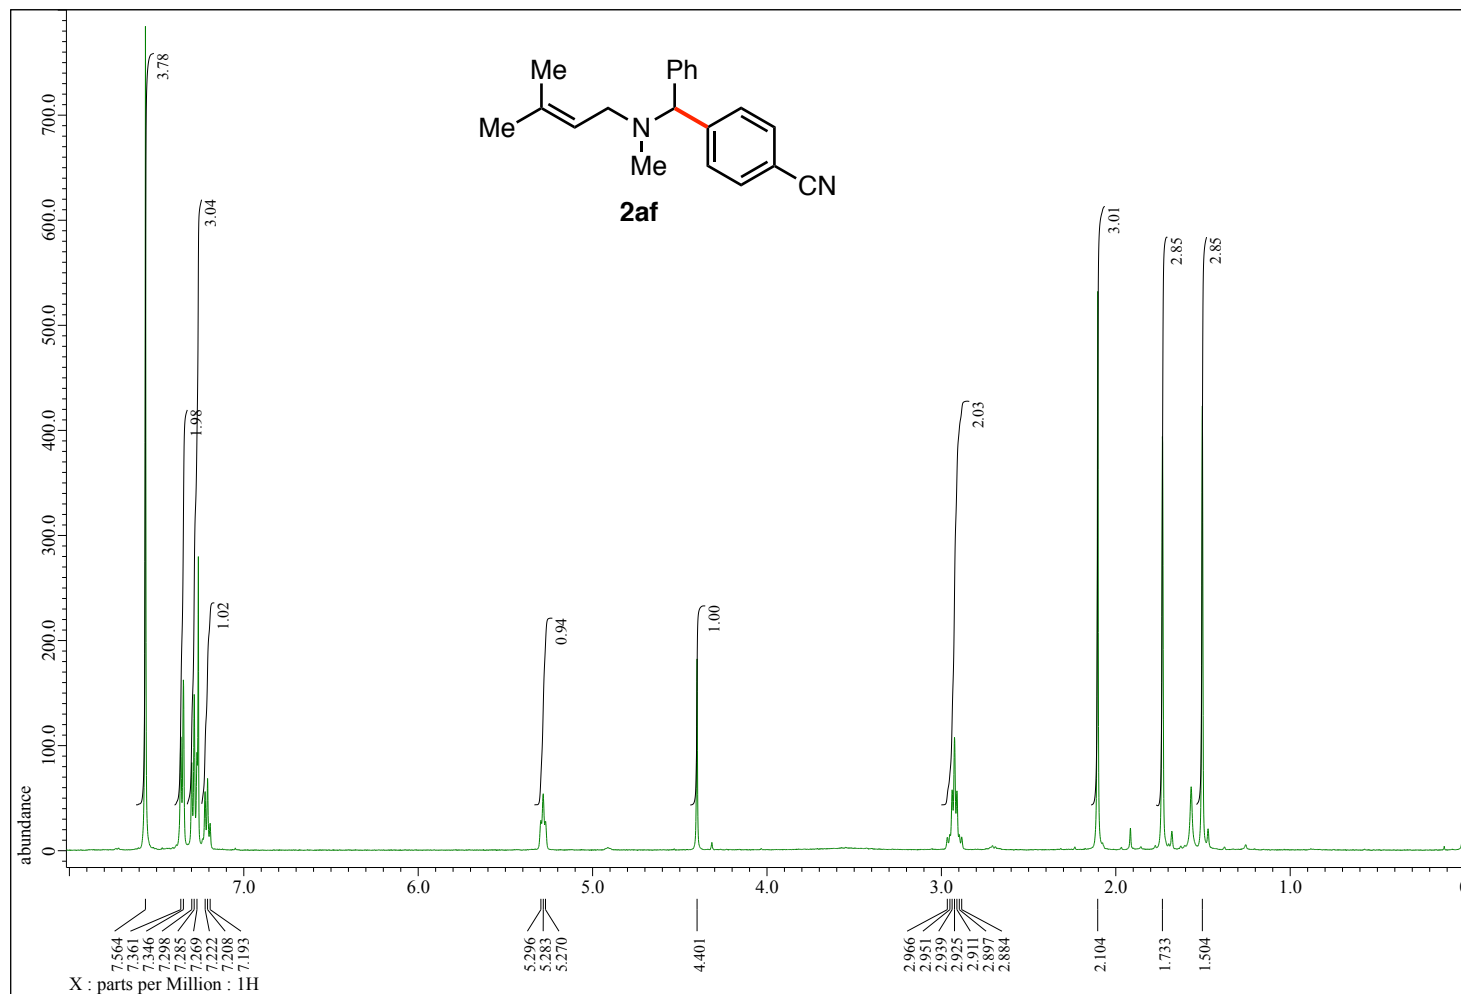

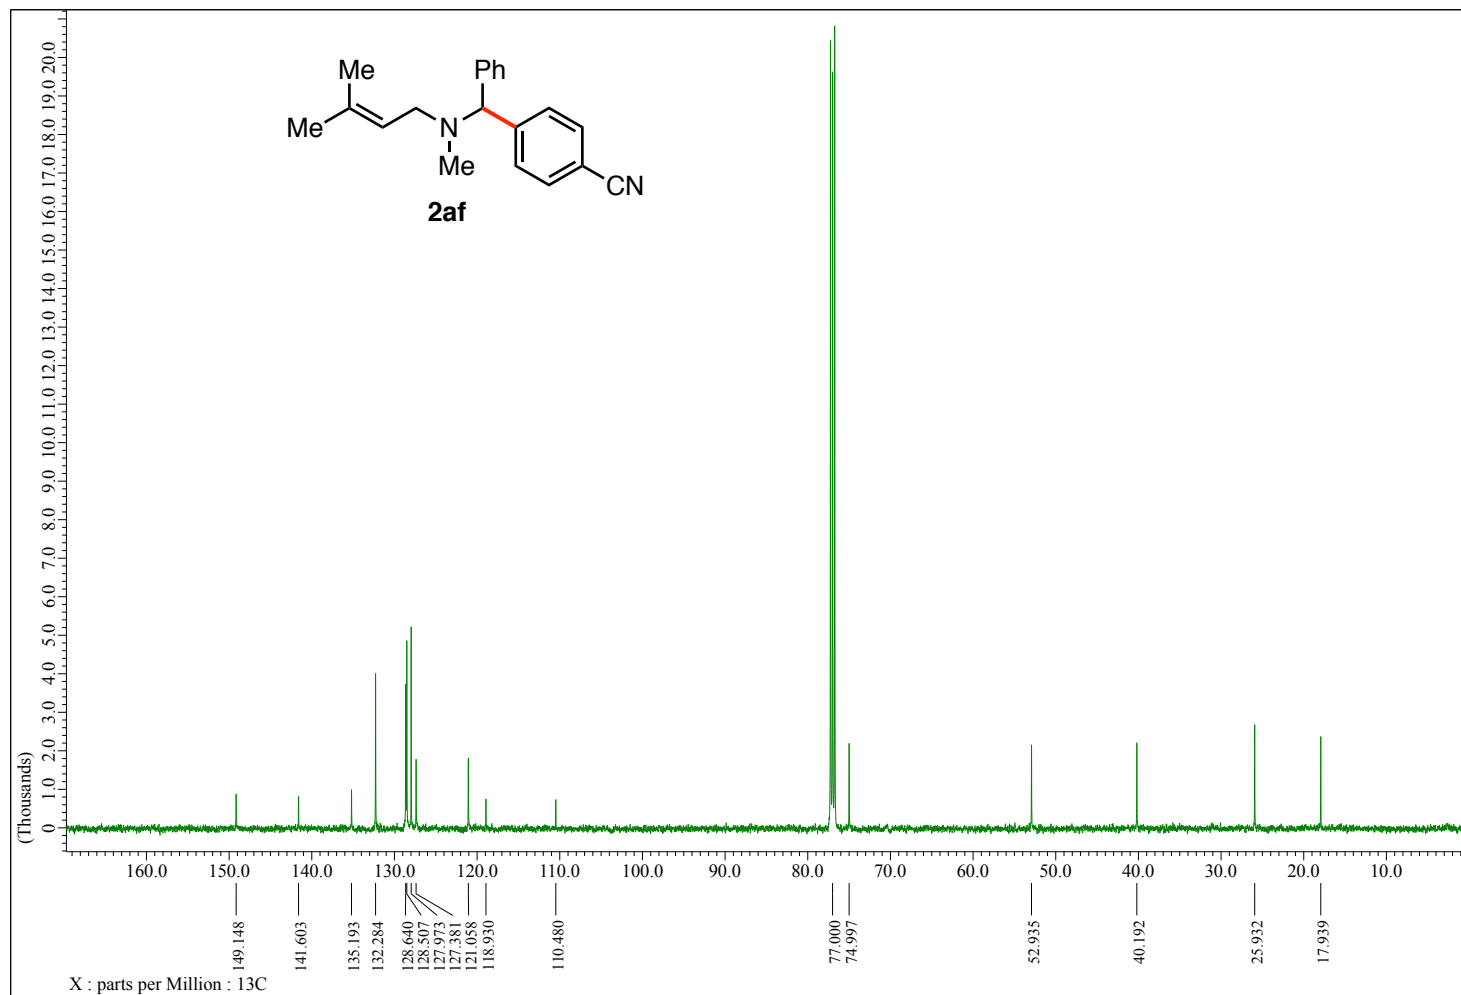



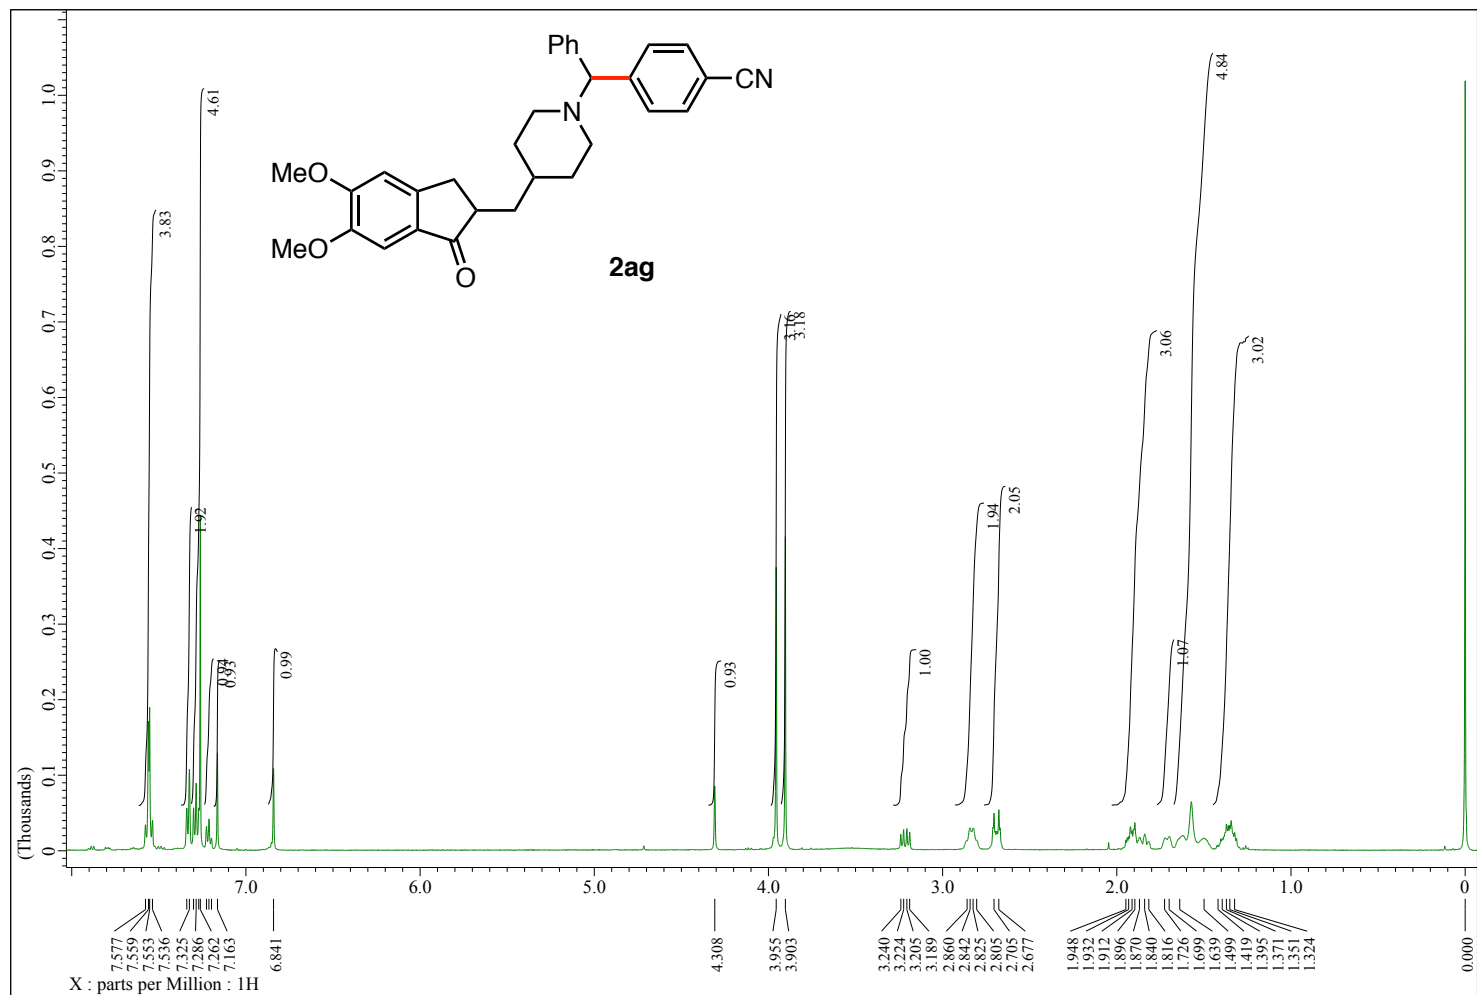

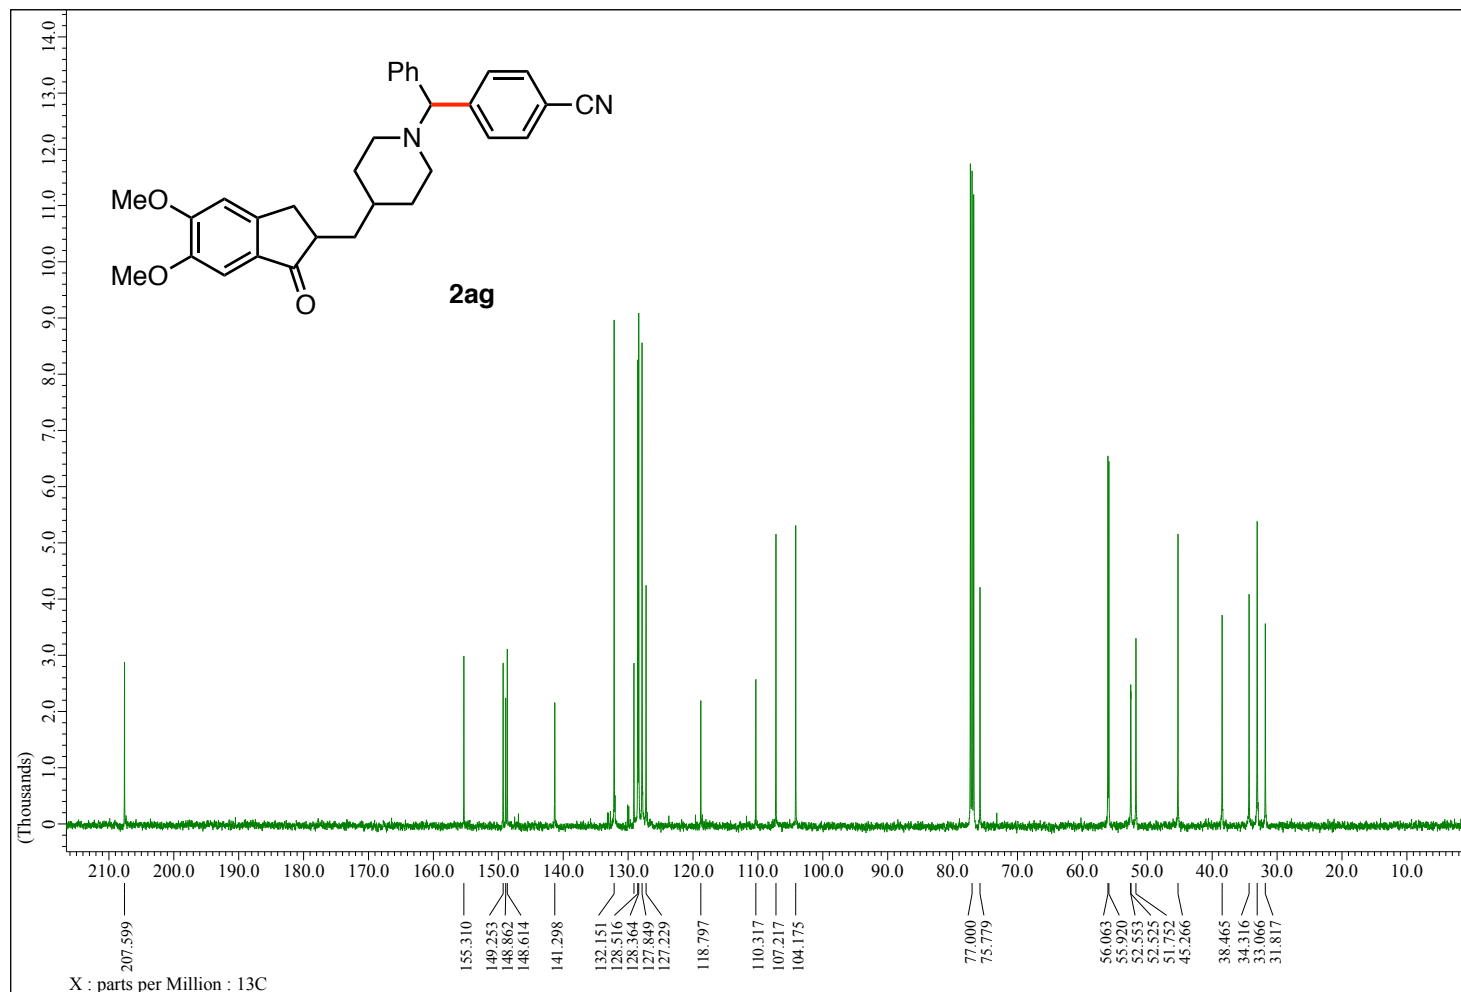

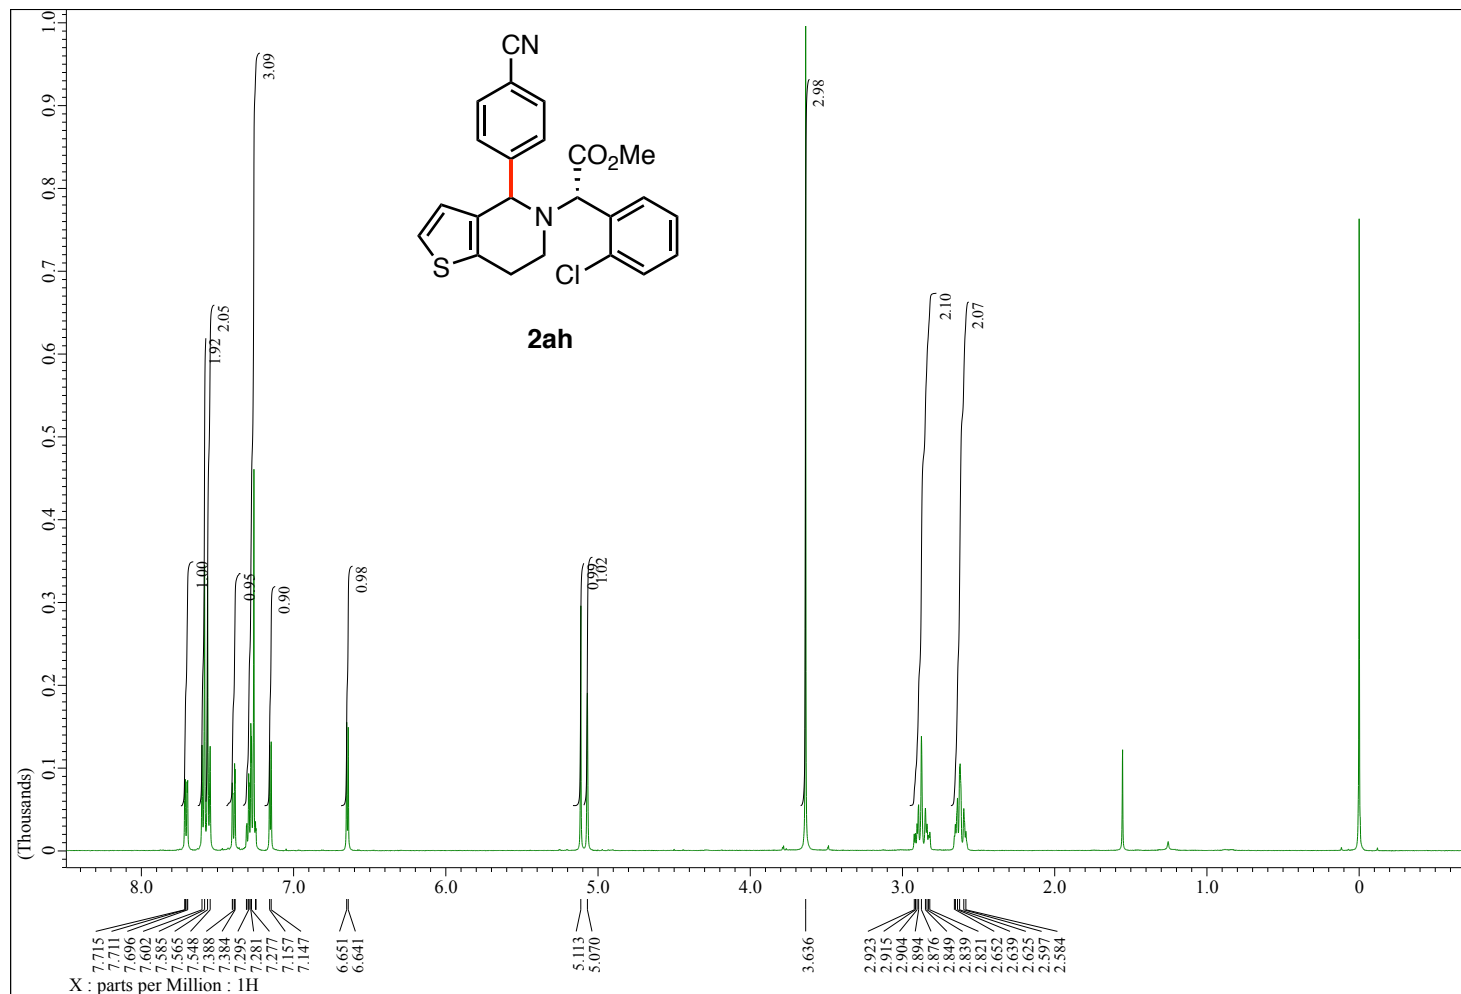

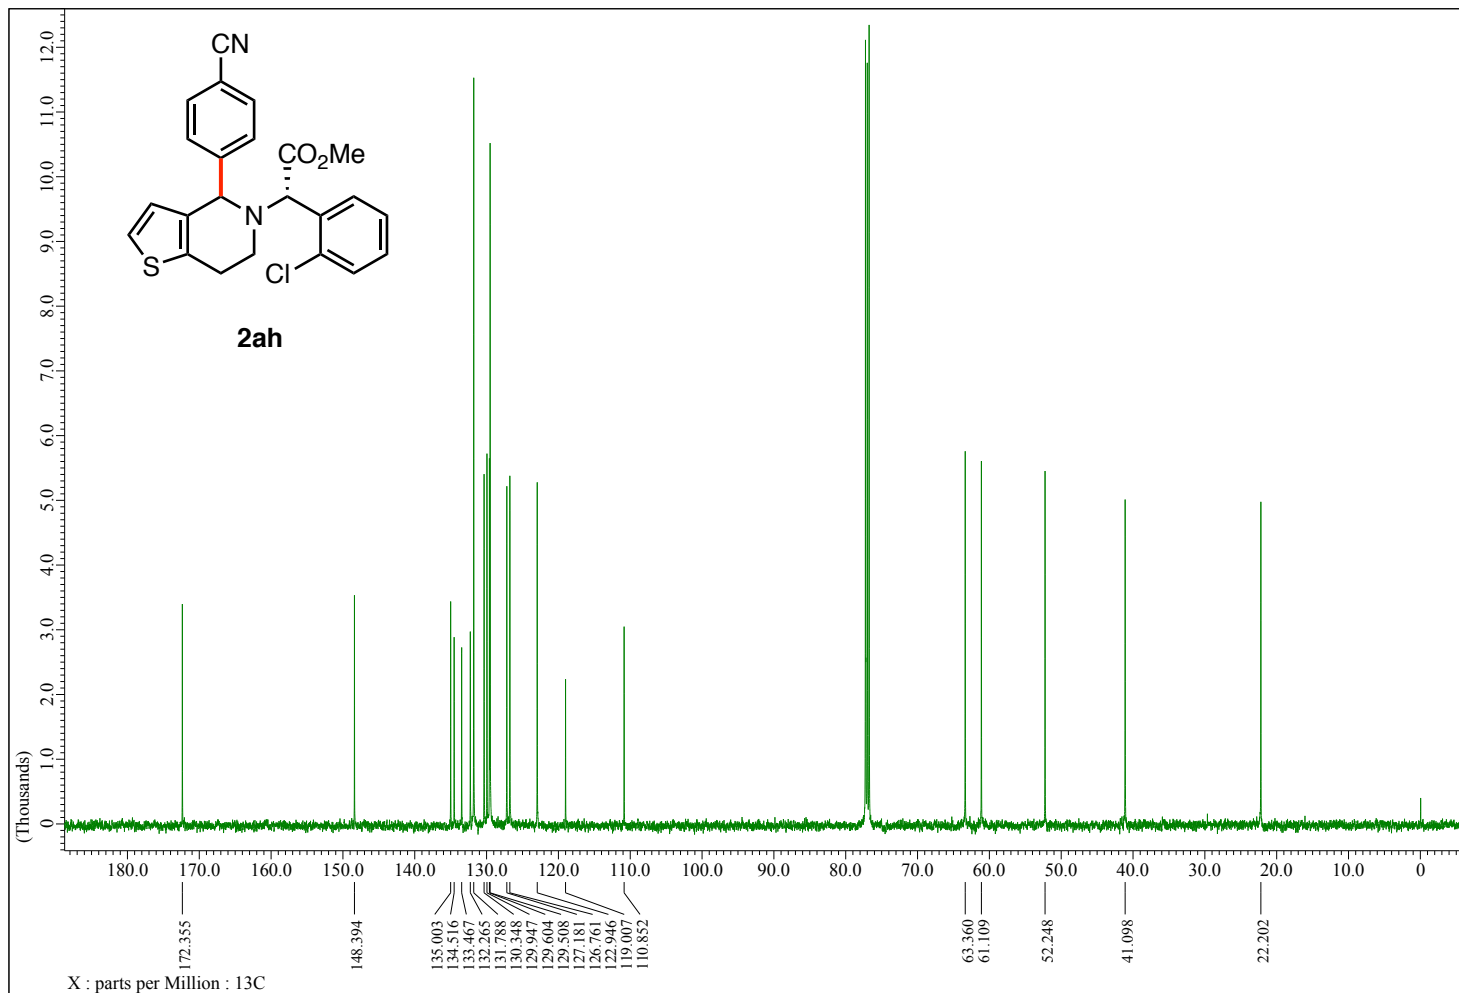

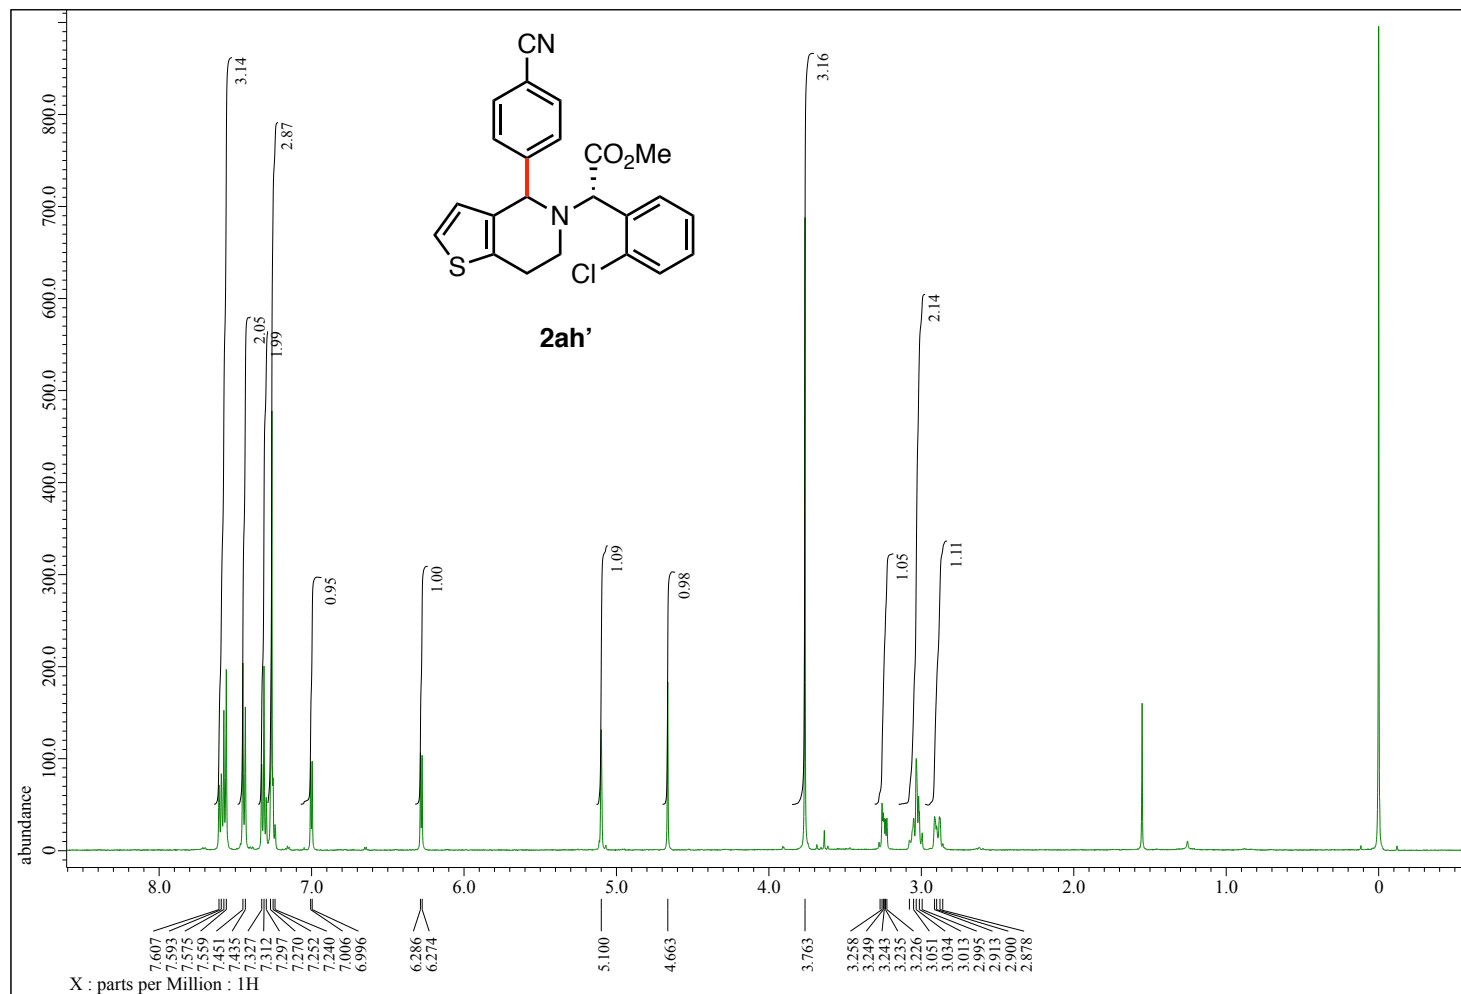

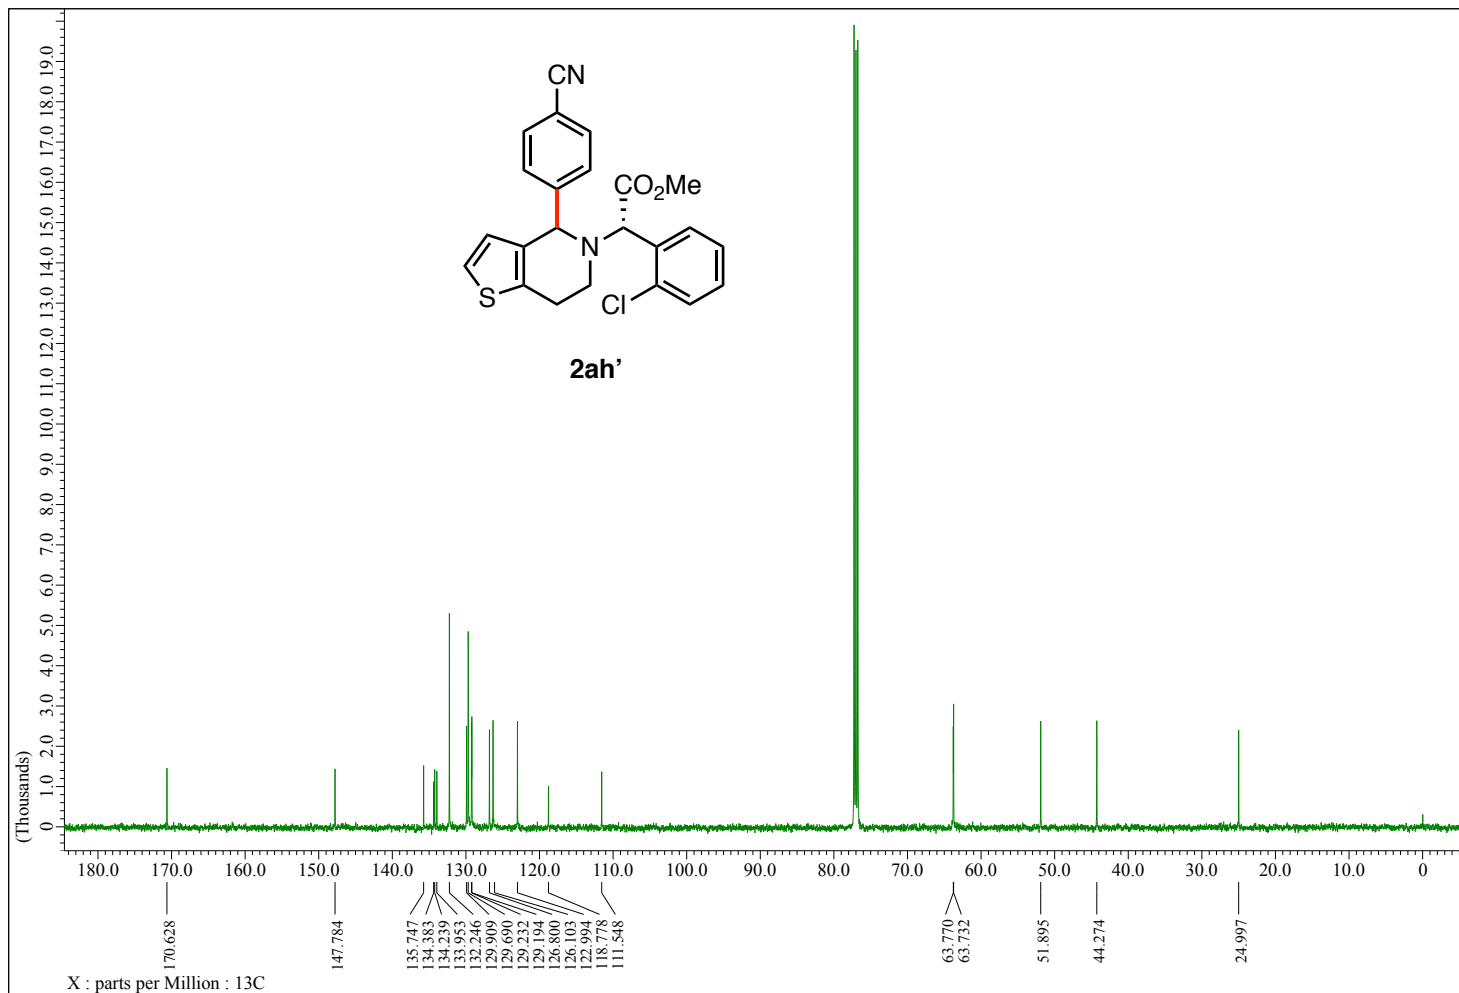

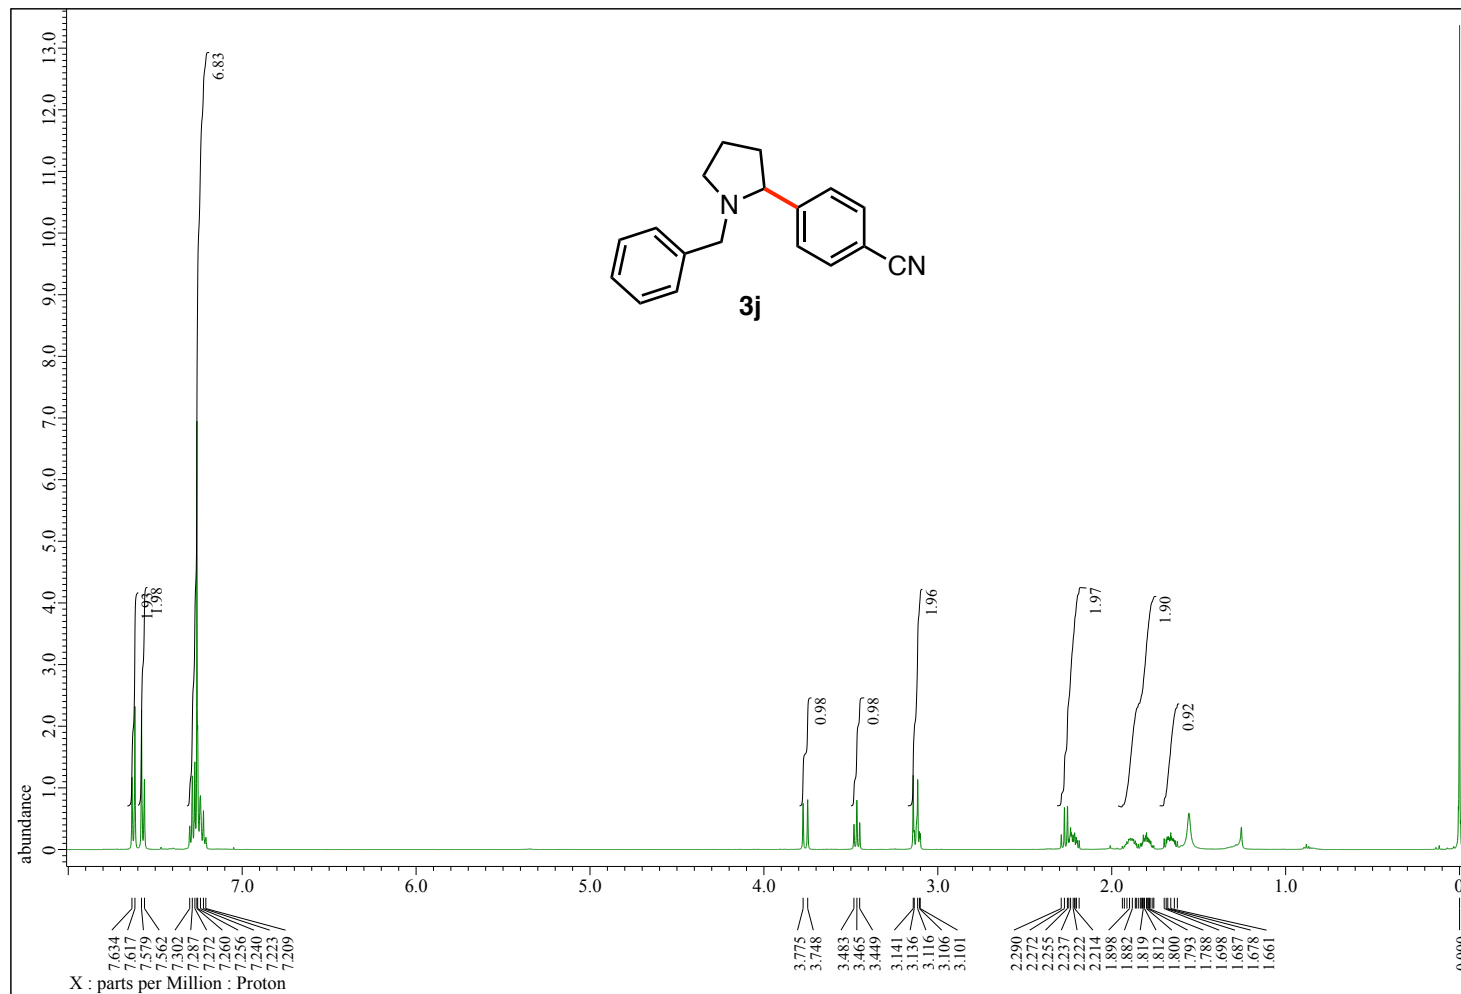

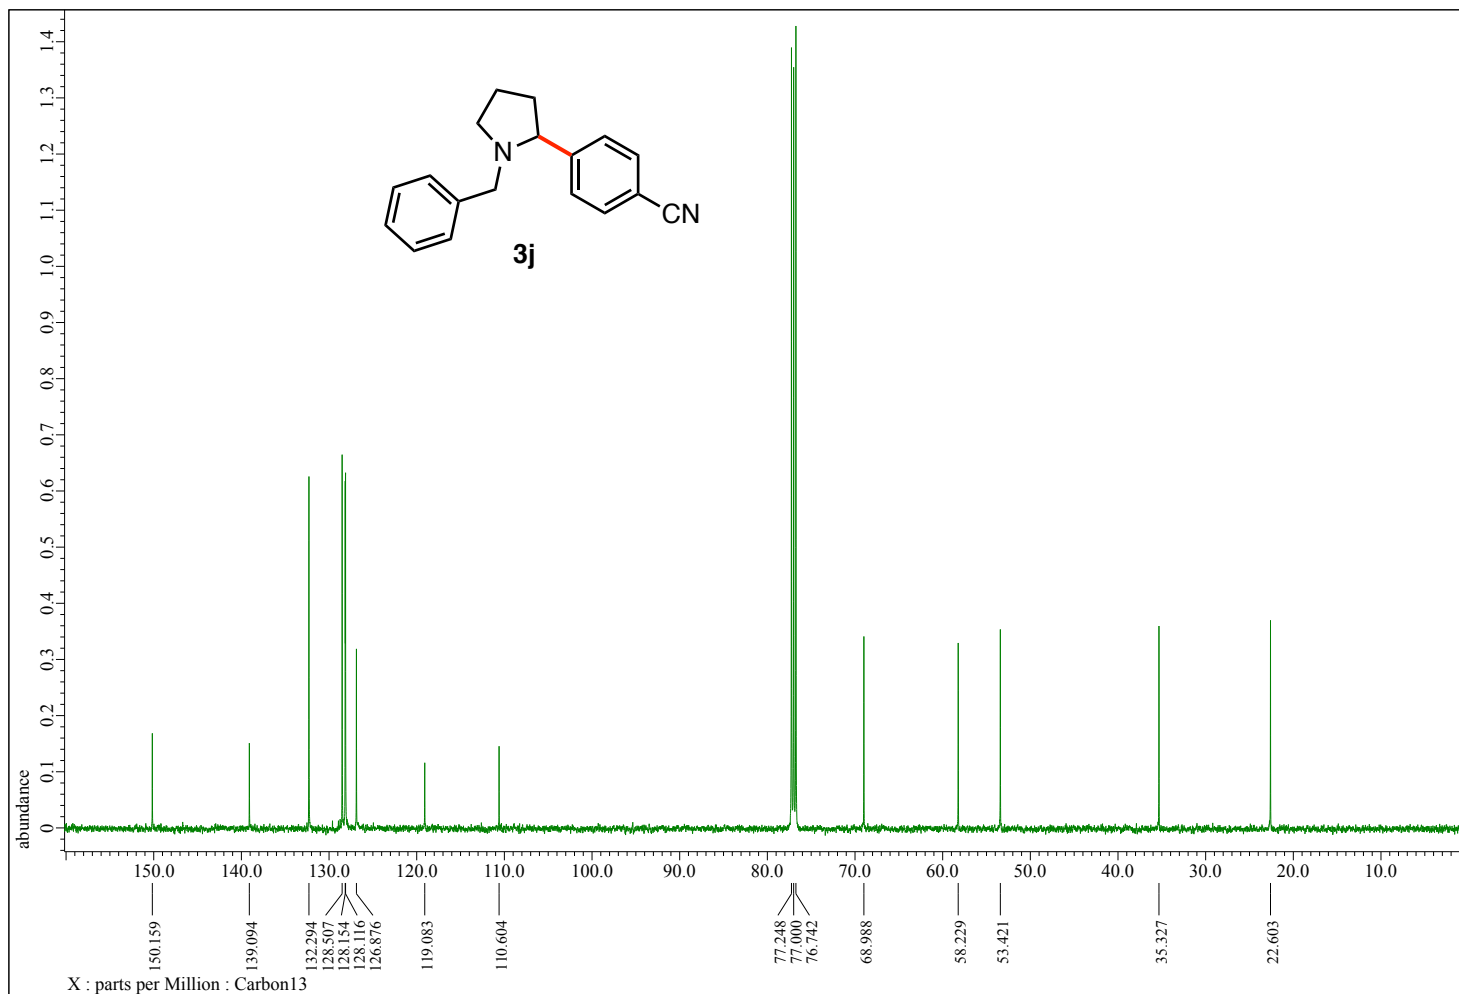

Supplement: SC-009-C8SC02965B-s001.pdf [file SC-009-C8SC02965B-s001.pdf]
